# Supplementary material
Source: PubMed Central journal article supplement (PMC3234370)
Supplement: mmc1.pdf [file mmc1.pdf]

The American Journal of Human Genetics, Volume 89

Supplemental Data

## Blood Pressure Loci Identified with a Gene-Centric Array

Toby Johnson, Tom R. Gaunt, Stephen J. Newhouse, Sandosh Padmanabhan, Maciej Tomaszewski, Meena Kumari, Richard W. Morris, Ioanna Tzoulaki, Eoin T. O'Brien, Neil R. Poulter, Peter Sever, Denis C. Shields, Simon Thom, Sasiwarang G. Wannamethee, Peter H. Whincup, Morris J. Brown, John M. Connell, Richard J. Dobson, Philip J. Howard, Charles A. Mein, Abiodun Onipinla, Sue Shaw-Hawkins, Yun Zhang, George Davey Smith, Ian N.M. Day, Debbie A. Lawlor, Alison H. Goodall, The Cardiogenics Consortium, F. Gerald Fowkes, Gonçalo R. Abecasis, Paul Elliott, Vesela Gateva, The Global BPgen Consortium, Peter S. Braund, Paul R. Burton, Christopher P. Nelson, Martin D. Tobin, Pim van der Harst, Nicola Glorioso, Hani Neuvirth, Erika Salvi, Jan A. Staessen, Andrea Stucchi, Nabila Devos, Xavier Jeunemaitre, Pierre-François Plouin, Jean Tichet, Peeter Juhanson, Elin Org, Margus Putku, Siim Sõber, Gudrun Veldre, Margus Viigimaa, Anna Levinsson, Annika Rosengren, Dag S. Thelle, Claire E. Hastie, Thomas Hedner, Wai K. Lee, Olle Melander, Björn Wahlstrand, Rebecca Hardy, Andrew Wong, Jackie A. Cooper, Jutta Palmen, Li Chen, Alexandre F.R. Stewart, George A. Wells, Harm-Jan Westra, Marcel G.M. Wolfs, Robert Clarke, Maria Grazia Franzosi, Anuj Goel, Anders Hamsten, Mark Lathrop, John F. Peden, Udo Seedorf, Hugh Watkins, Willem H. Ouwehand, Jennifer Sambrook, Jonathan Stephens, Juan-Pablo Casas, Fotios Drenos, Michael V. Holmes, Mika Kivimaki, Sonia Shah, Tina Shah, Philippa J. Talmud, John Whittaker, Chris Wallace, Christian Delles, Maris Laan, Diana Kuh, Steve E. Humphries, Fredrik Nyberg, Daniele Cusi, Robert Roberts, Christopher Newton-Cheh, Lude Franke, Alice V. Stanton, Anna F. Dominiczak, Martin Farrall, Aroon D. Hingorani, Nilesh J. Samani, Mark J. Caulfield, and Patricia B. Munroe

## Contents

|          |                                                                |           |
|----------|----------------------------------------------------------------|-----------|
| <b>1</b> | <b>Supplemental Figures</b>                                    | <b>3</b>  |
| <b>2</b> | <b>Supplemental Tables</b>                                     | <b>20</b> |
| <b>3</b> | <b>Acknowledgments</b>                                         | <b>54</b> |
| <b>4</b> | <b>Internet resources</b>                                      | <b>57</b> |
| <b>5</b> | <b>Author contributions</b>                                    | <b>58</b> |
| <b>6</b> | <b>Global BPgen (GBPG) consortium members and affiliations</b> | <b>58</b> |
| <b>7</b> | <b>Cardiogenics WP5 members and affiliations</b>               | <b>62</b> |

# 1 Supplemental Figures

## List of Figures

|     |                                                                                                   |    |
|-----|---------------------------------------------------------------------------------------------------|----|
| S1  | QQ plots for DBP by study . . . . .                                                               | 4  |
| S2  | QQ plots for MAP by study . . . . .                                                               | 5  |
| S3  | QQ plots for PP by study . . . . .                                                                | 6  |
| S4  | QQ plots for SBP by study . . . . .                                                               | 7  |
| S5  | QQ plots for dichotomous hypertension (HTN) by study . . . . .                                    | 8  |
| S6  | Effect size estimate inflation and phenotypic variance inflation in ascertained samples . . . . . | 9  |
| S7  | QQ plots of meta-analysis results for dichotomous hypertension (HTN) . . . . .                    | 10 |
| S8  | Manhattan plot showing the best $P$ value over the five phenotypes studied . . . . .              | 11 |
| S9  | Forest plots for 10 SNPs followed up . . . . .                                                    | 12 |
| S9  | Forest plots for 10 SNPs followed up (continued) . . . . .                                        | 13 |
| S10 | Coverage of HumanCVD BeadChip content by standard GWAS meta-analysis . . . . .                    | 14 |
| S11 | Regional association plot for chromosomal region 11p15.2-11p15.1 . . . . .                        | 15 |
| S12 | Regional association plot at the AGT locus . . . . .                                              | 16 |
| S13 | Density of aligned reads from ChIP-Seq experiments . . . . .                                      | 17 |
| S14 | Relationship between Bayes Factors and pairwise LD . . . . .                                      | 18 |
| S15 | Relationship between Bayes Factors and $P$ values . . . . .                                       | 19 |

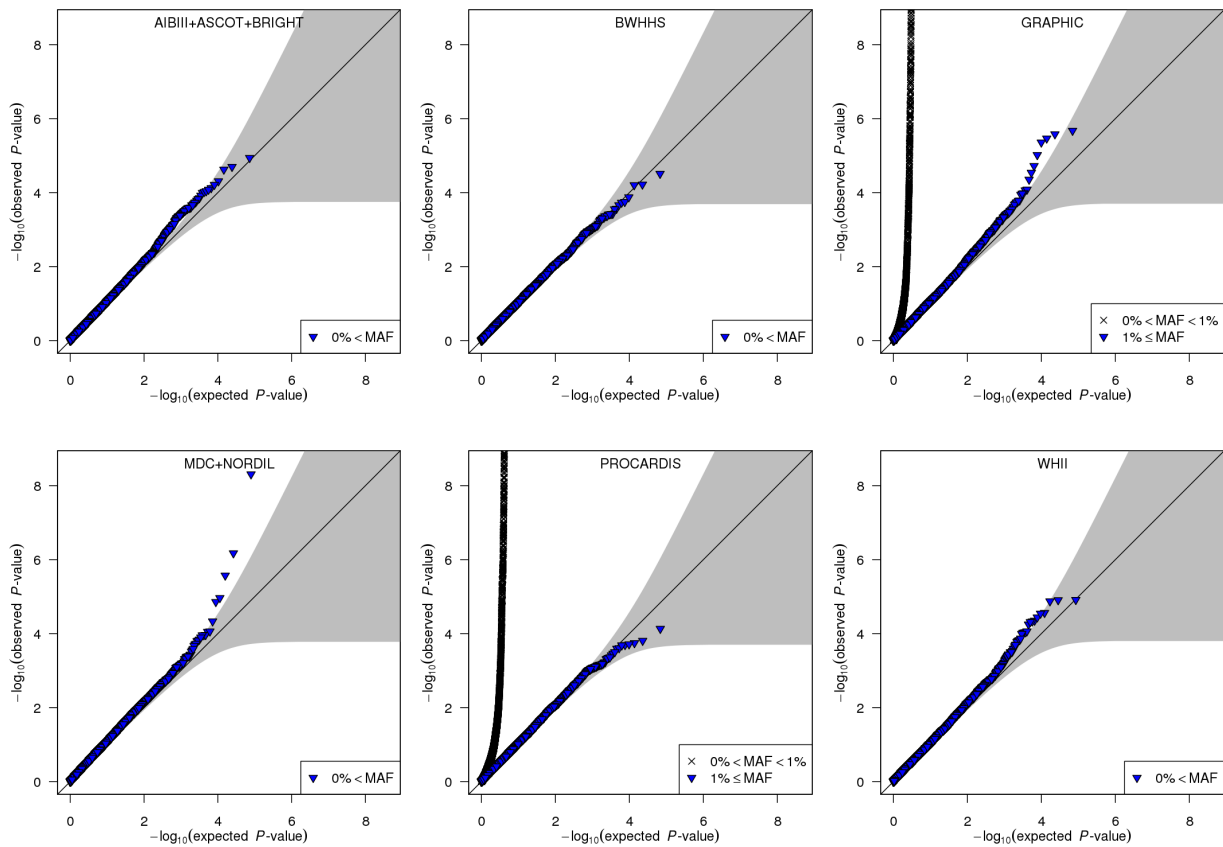

Fig. S1: QQ plots for DBP by study after exclusion of SNPs on basis of Hardy-Weinberg proportions ( $P < 10^{-6}$ ), missingness (call rate  $< 0.98$  for single cohort studies and call rate  $< 0.9975$  for studies combining case and control cohorts), and differential missingness ( $P < 10^{-6}$ ). Grey shaded regions are 99% probability envelopes for no association. Inspection of these plots indicated that, in cohorts with related individuals (GRAPHIC and PROCARDIS), SNPs with MAF  $< 0.01$  should be excluded because they showed gross departure from null expectations, whereas in studies with unrelated individuals no exclusion on the basis of MAF was necessary.

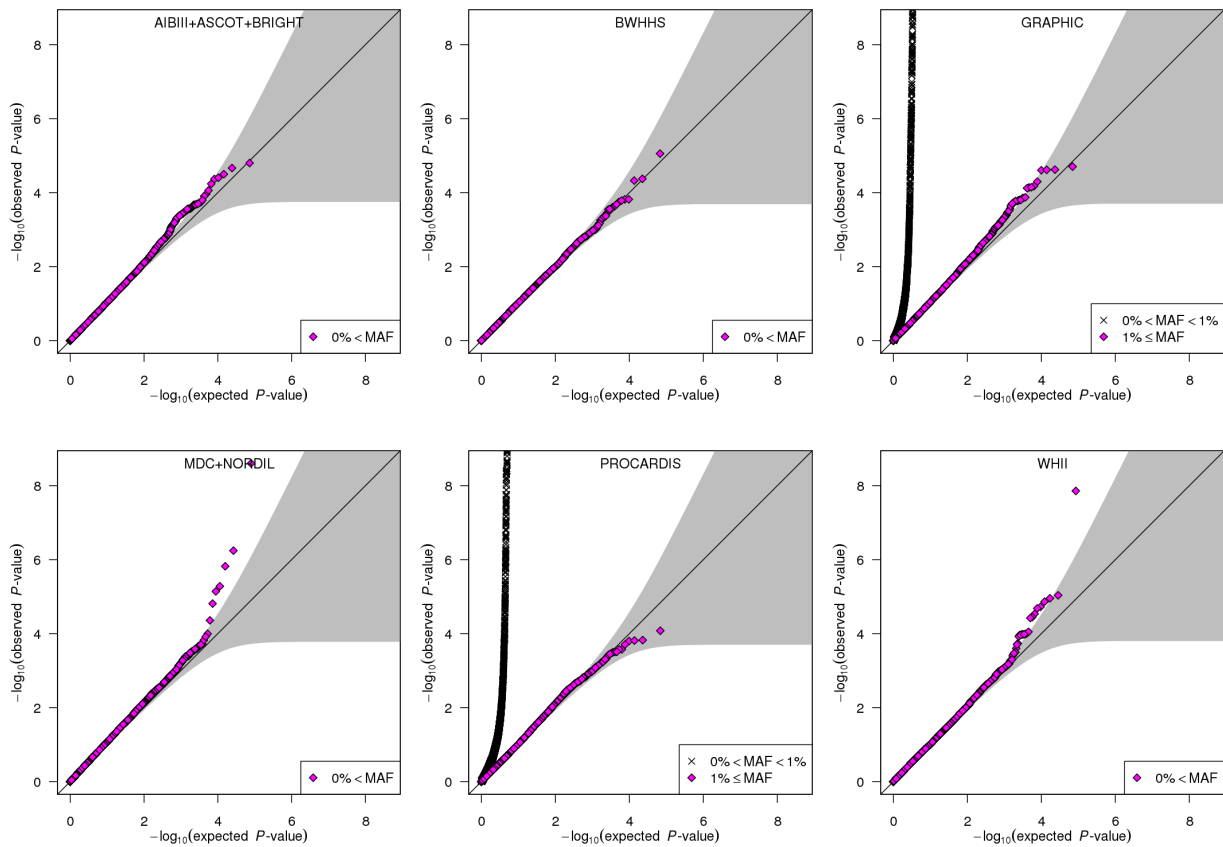

Fig. S2: QQ plots for MAP by study after exclusion of SNPs on basis of Hardy-Weinberg proportions ( $P < 10^{-6}$ ), missingness (call rate  $< 0.98$  for single cohort studies and call rate  $< 0.9975$  for studies combining case and control cohorts), and differential missingness ( $P < 10^{-6}$ ). Grey shaded regions are 99% probability envelopes for no association. Inspection of these plots indicated that, in cohorts with related individuals (GRAPHIC and PROCARDIS), SNPs with MAF  $< 0.01$  should be excluded because they showed gross departure from null expectations, whereas in studies with unrelated individuals no exclusion on the basis of MAF was necessary.

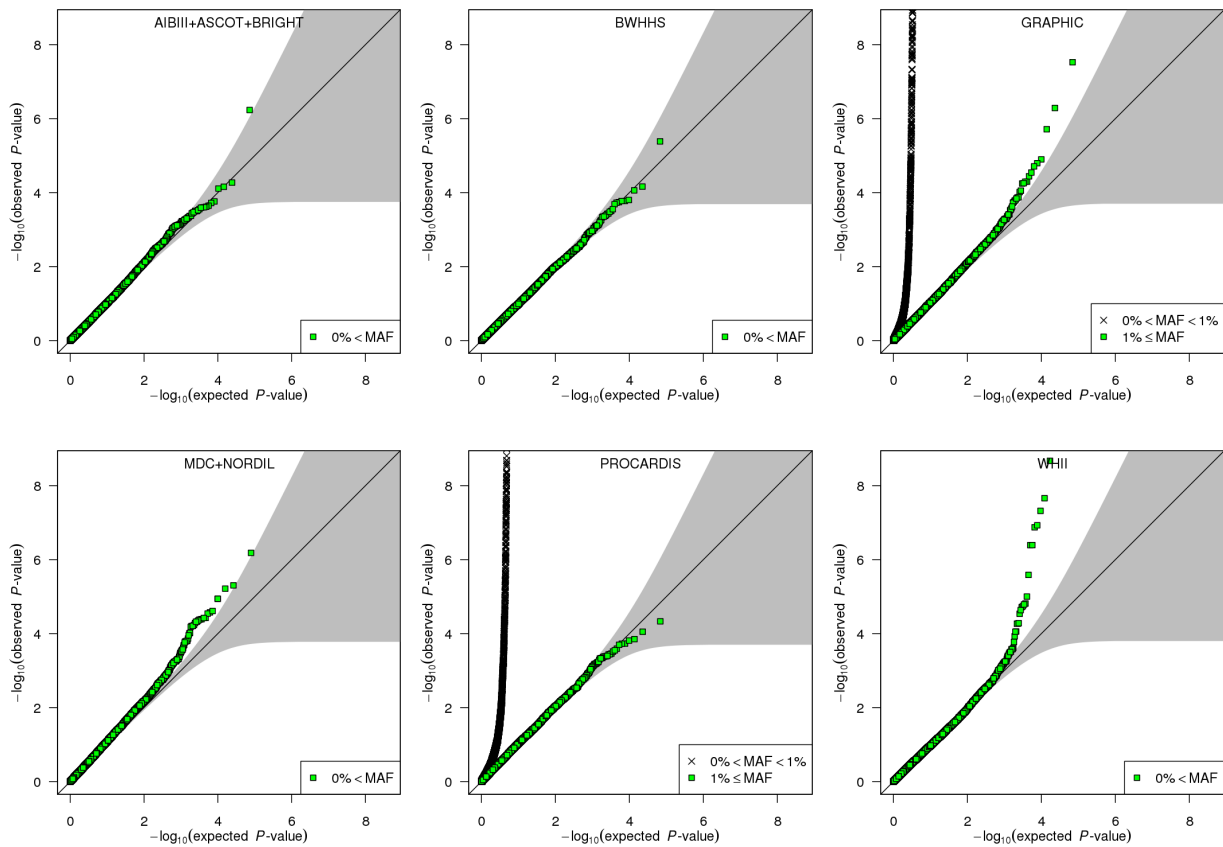

Fig. S3: QQ plots for PP by study after exclusion of SNPs on basis of Hardy-Weinberg proportions ( $P < 10^{-6}$ ), missingness (call rate  $< 0.98$  for single cohort studies and call rate  $< 0.9975$  for studies combining case and control cohorts), and differential missingness ( $P < 10^{-6}$ ). Grey shaded regions are 99% probability envelopes for no association. Inspection of these plots indicated that, in cohorts with related individuals (GRAPHIC and PROCARDIS), SNPs with MAF  $< 0.01$  should be excluded because they showed gross departure from null expectations, whereas in studies with unrelated individuals no exclusion on the basis of MAF was necessary.

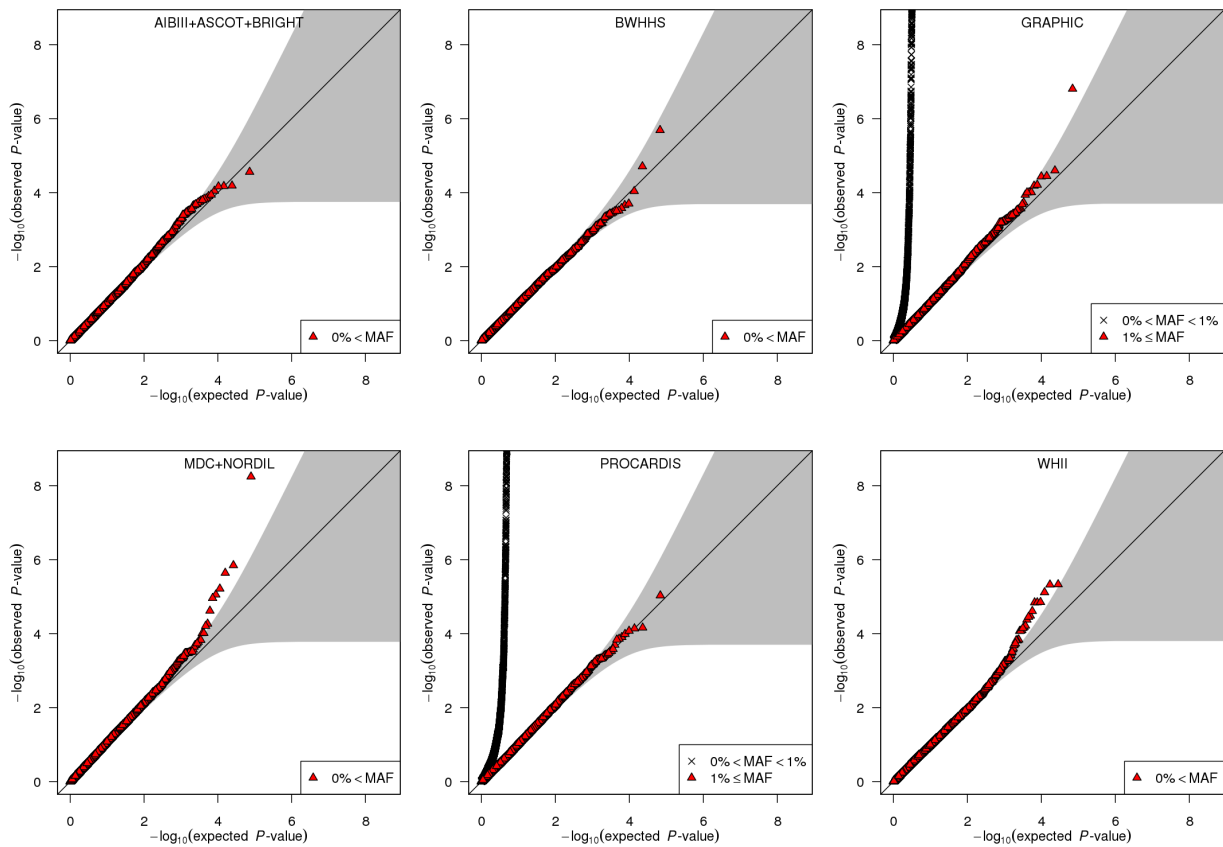

Fig. S4: QQ plots for SBP by study after exclusion of SNPs on basis of Hardy-Weinberg proportions ( $P < 10^{-6}$ ), missingness (call rate  $< 0.98$  for single cohort studies and call rate  $< 0.9975$  for studies combining case and control cohorts), and differential missingness ( $P < 10^{-6}$ ). Grey shaded regions are 99% probability envelopes for no association. Inspection of these plots indicated that, in cohorts with related individuals (GRAPHIC and PROCARDIS), SNPs with MAF  $< 0.01$  should be excluded because they showed gross departure from null expectations, whereas in studies with unrelated individuals no exclusion on the basis of MAF was necessary.

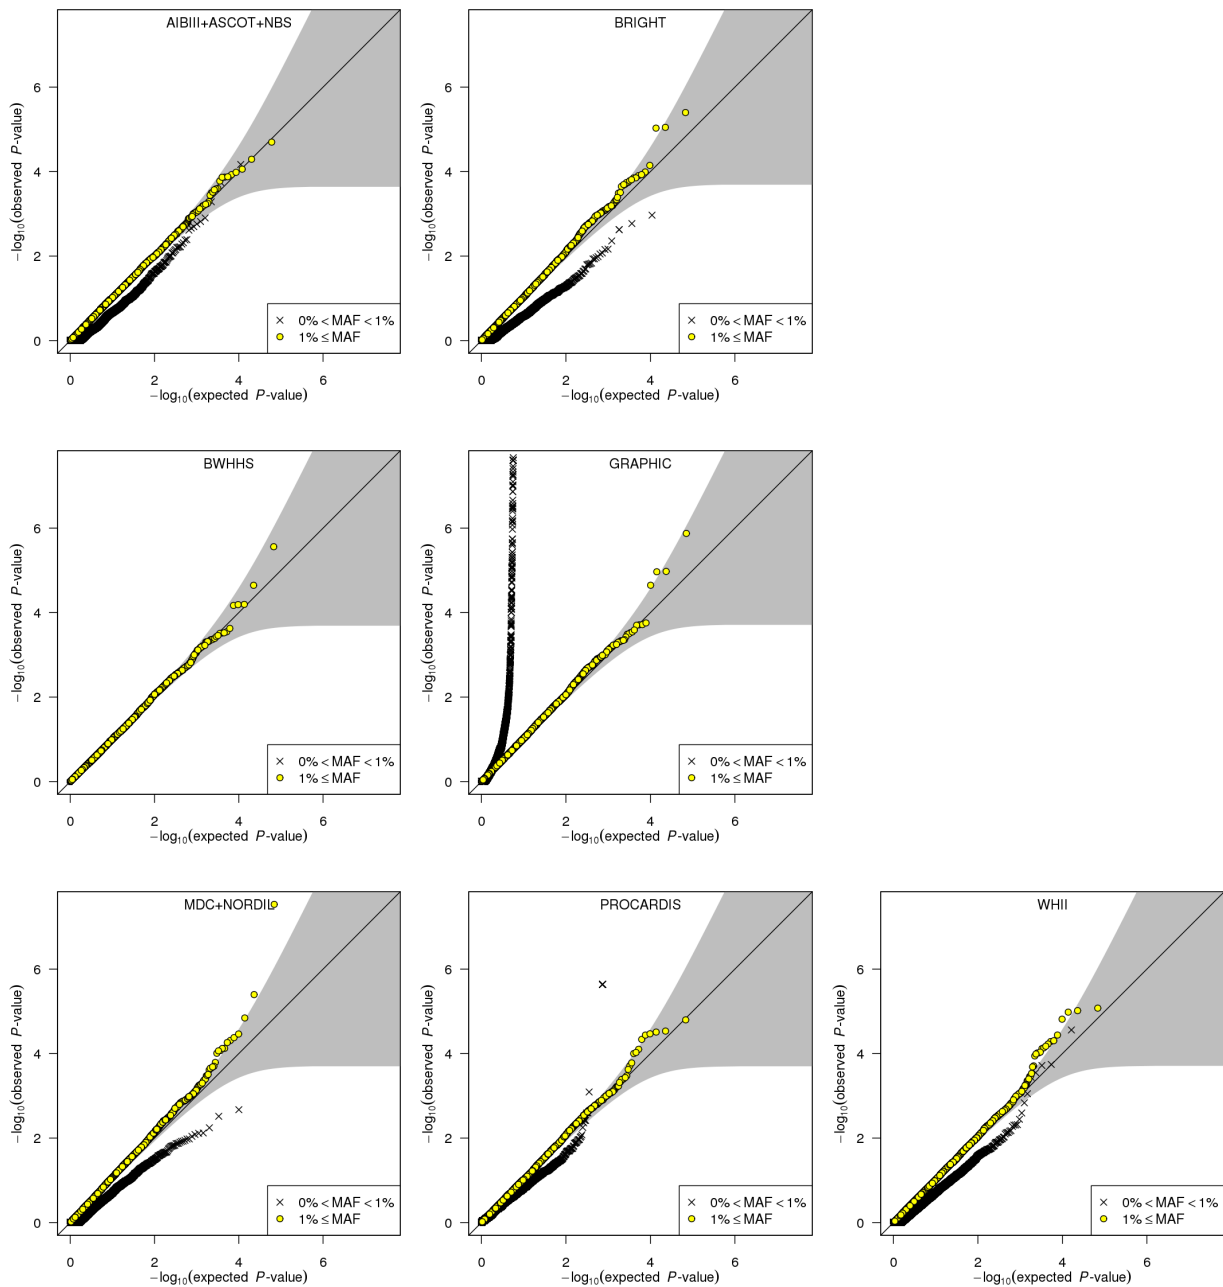

Fig. S5: QQ plots for dichotomous hypertension (HTN) by study after exclusion of SNPs on basis of Hardy-Weinberg proportions ( $P < 10^{-6}$ ), missingness (call rate  $< 0.98$  for single cohort studies and call rate  $< 0.9975$  for studies combining case and control cohorts), and differential missingness ( $P < 10^{-6}$ ). Grey shaded regions are 99% probability envelopes for no association. We decided *a priori* to exclude SNPs with MAF  $< 0.01$  from analyses for HTN because the normal null test statistic distribution for logistic regression analyses applies only asymptotically.



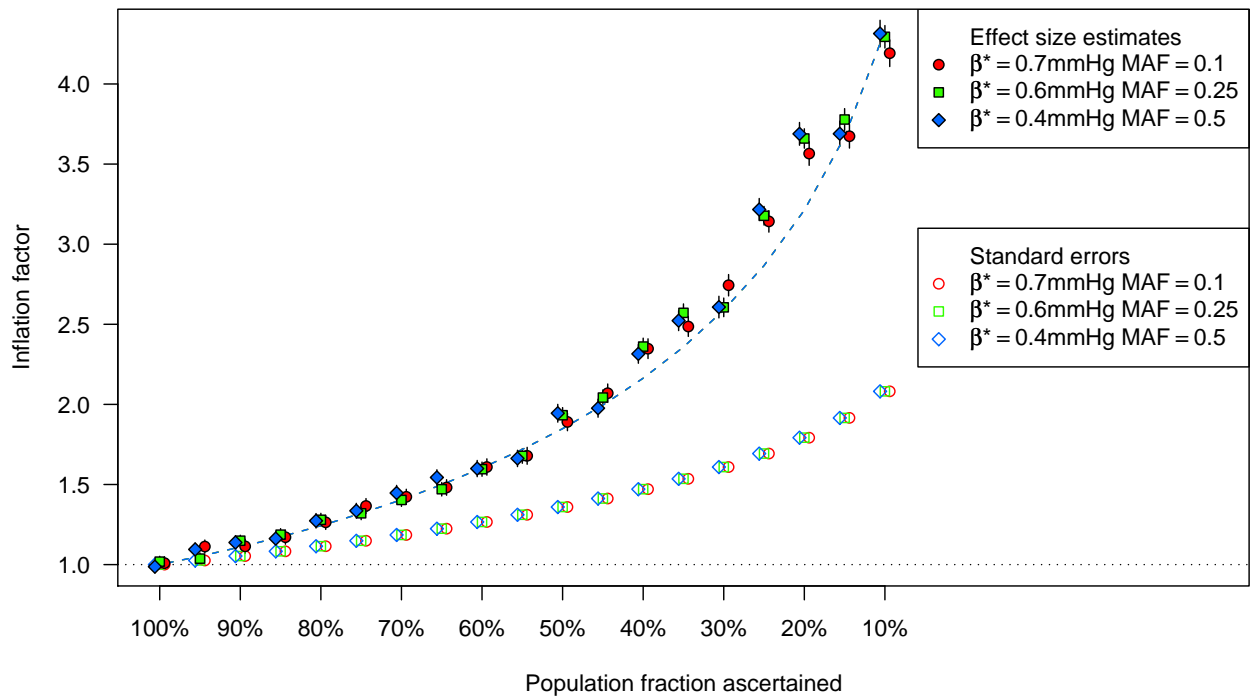

Fig. S6: **Effect size estimate inflation and phenotypic variance inflation in ascertained samples**, plotted as functions of the population fraction satisfying the sample ascertainment criteria (x-axis; 100% means no ascertainment). For each parameter combination, averages from 1000 replicate simulations are plotted, with vertical bars to show associated standard errors. For each replicate a large population was simulated and association statistics were calculated in an ascertained sample drawn from that population. Filled points show the inflation of the effect size estimate obtained in an ascertained sample, relative to the true per-allele effect size in the population from which the sample was drawn ( $\beta^*$ ). As the degree of ascertainment increases, the effect size estimate inflation increases faster than the standard error inflation (open points), and hence power increases. Although direct estimation of the effect size estimate inflation is sensitive to precise details of the ascertainment scheme (not shown), we observed that for all parameter combinations and ascertainment schemes simulated, the effect size estimate inflation is robustly estimated by the inflation in phenotypic variance in an ascertained sample, relative to the phenotypic variance in the population from which the sample was drawn (dashed curves; indistinguishable for the different  $\beta^*$  and MAF combinations).

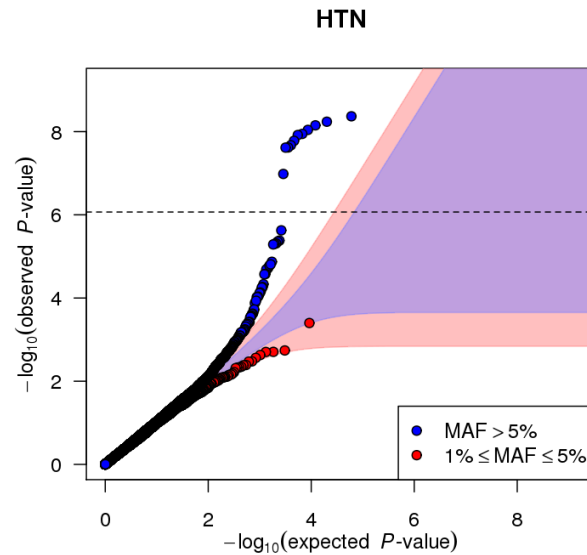

Fig. S7: **QQ plots of meta-analysis results for dichotomous hypertension (HTN)**. The plot shows common ( $\text{MAF} > 5\%$ ; blue) and some low-frequency ( $1\% < \text{MAF} \leq 5\%$ ; red) SNPs separately. SNPs with  $\text{MAF} \leq 1\%$  were not analysed for HTN; see Fig. S5. Shaded regions are 99% probability envelopes for no association, which depend on the number of SNPs and hence are different sizes for common and low-frequency SNPs. The horizontal dashed line indicates our overall study-specific significance threshold  $P < 8.56 \times 10^{-7}$ .

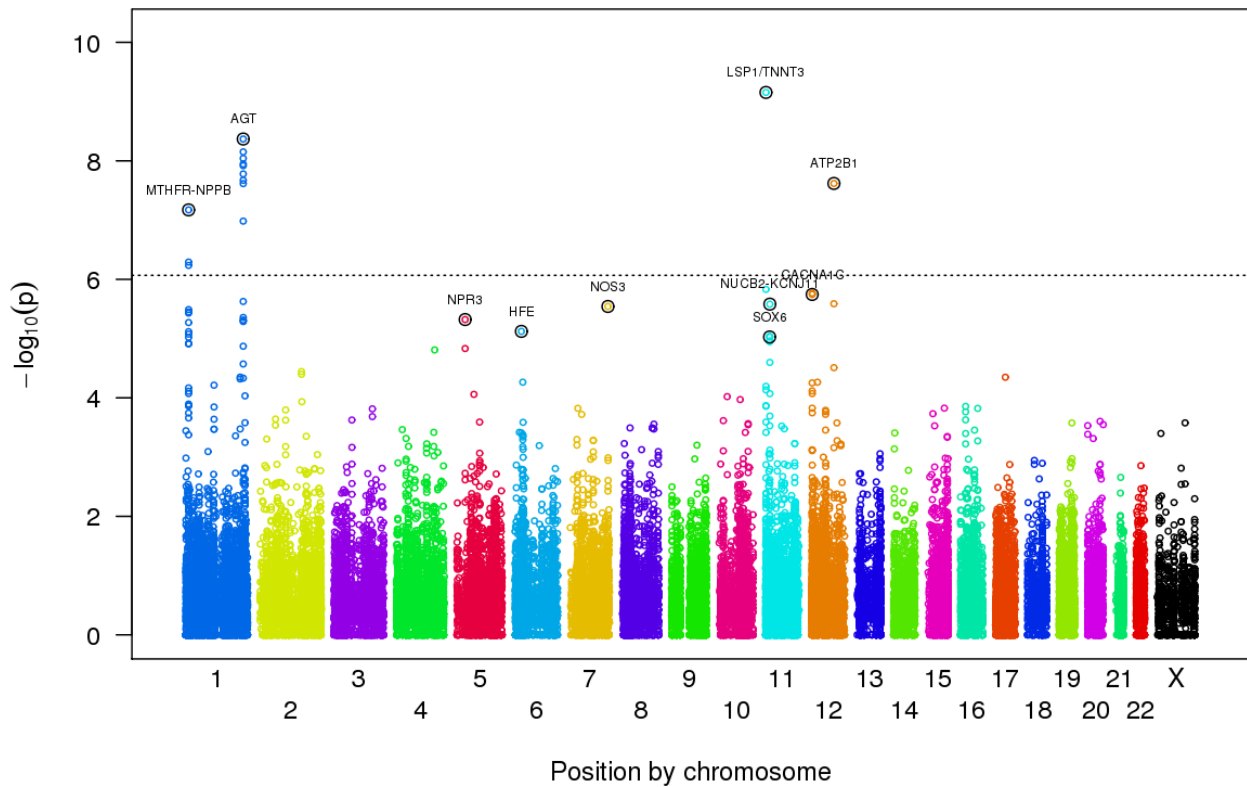

Fig. S8: **Manhattan plot showing the best  $P$  value over the five phenotypes studied.** The plot shows the best  $P$  value over association analyses for DBP, MAP, PP, SBP and HTN, for each SNP in the discovery meta-analysis. Although these “best”  $P$  values do not have a standard distribution (uniform on the  $[0, 1]$  interval) under the null hypothesis of no association, we estimated an appropriate significance threshold  $P < 8.56 \times 10^{-7}$  (horizontal dashed line) taking into account multiple testing over the five phenotypes and over the 49,452 SNPs on the HumanCVD BeadChip, to control the overall study-wise false positive rate (FWER) at 5%. The ten SNPs targeted for followup analysis are labelled.

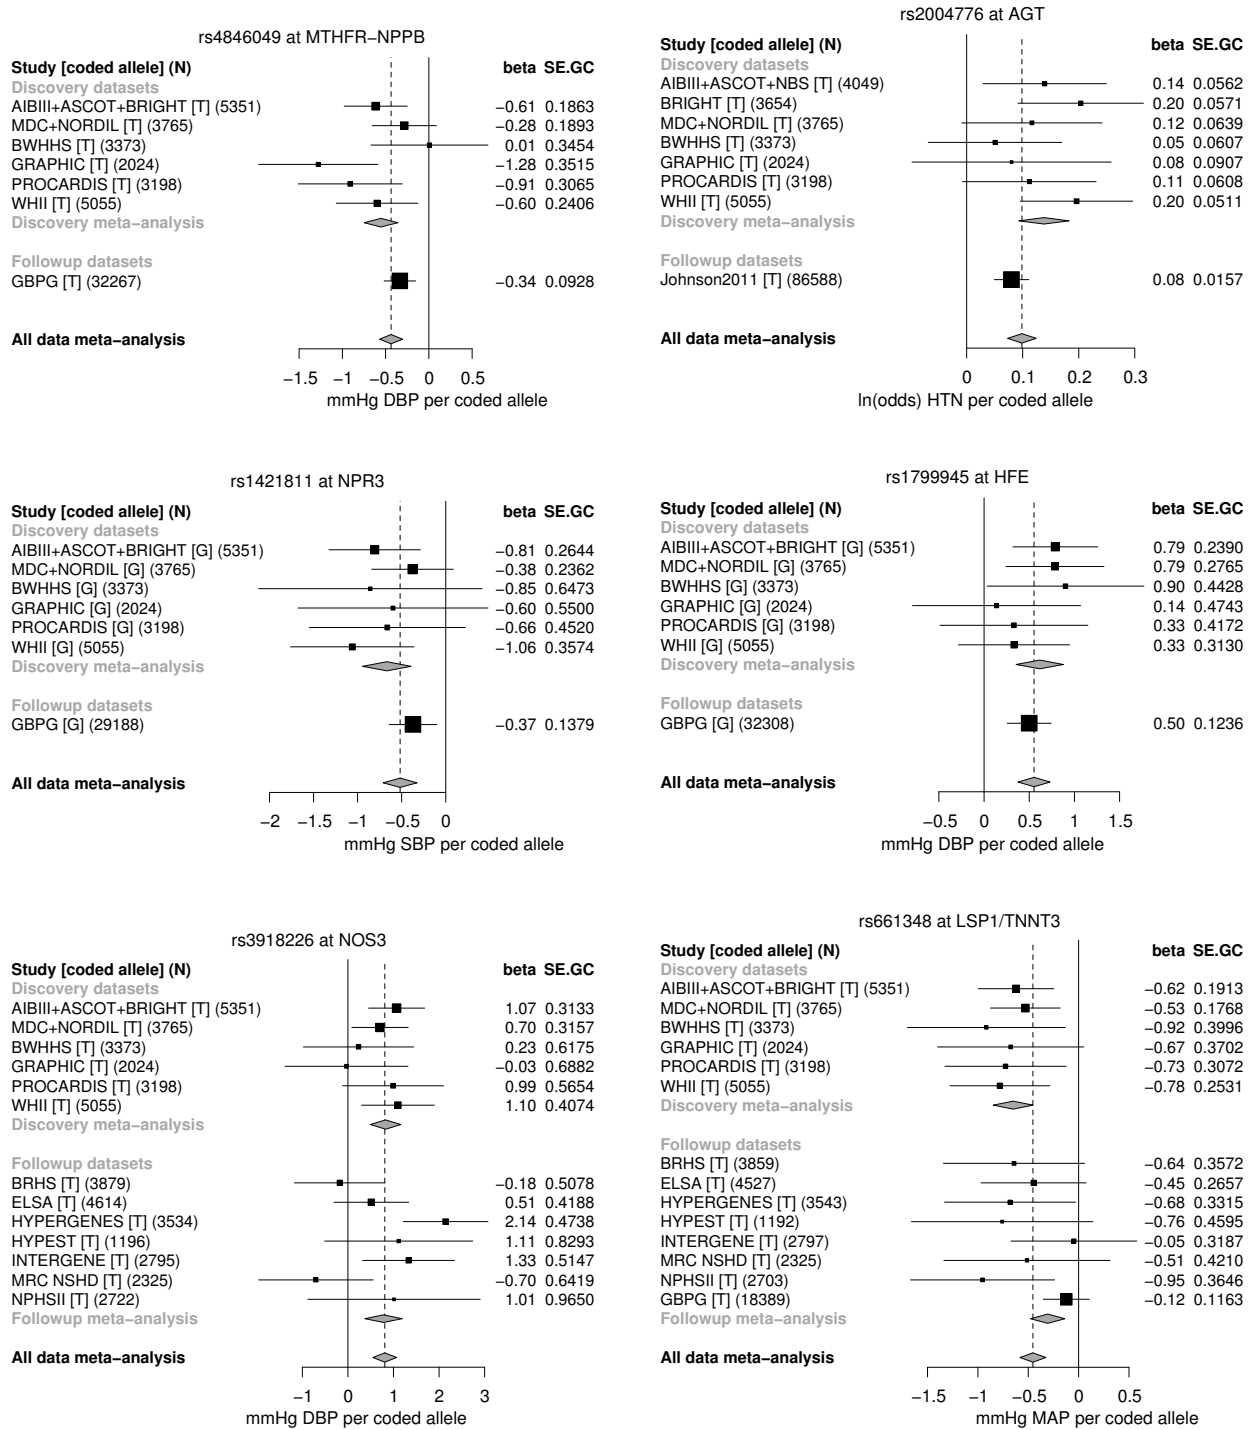

Fig. S9: Forest plots for 10 SNPs followed up (continued and with legend on next page).

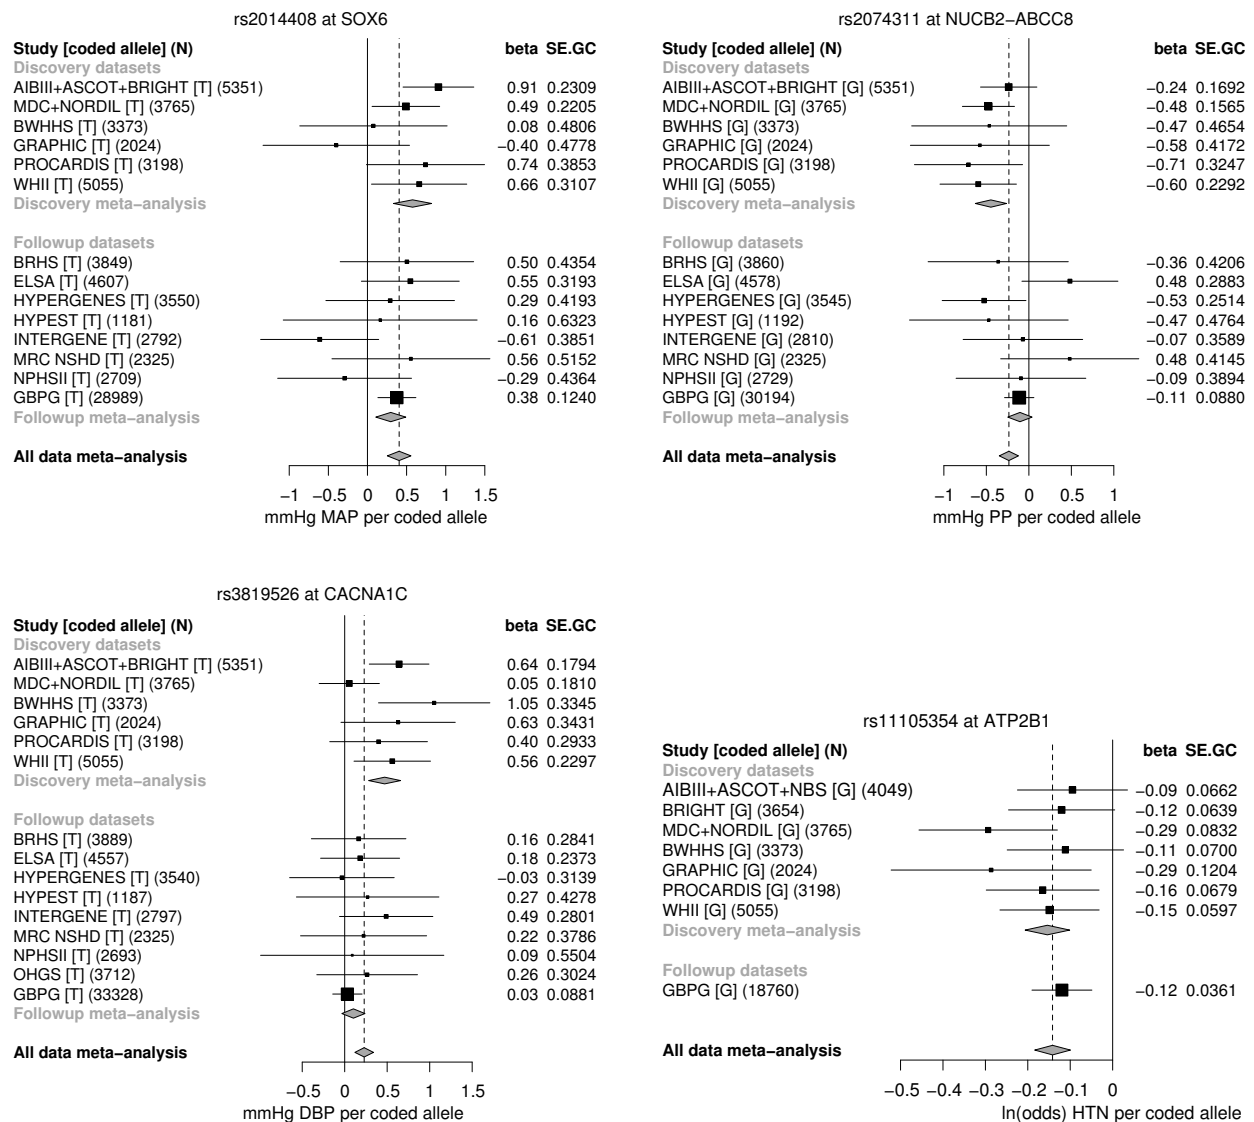

Fig. S9: Forest plots for 10 SNPs followed up (continued from previous page). For each of the 10 SNPs targeted for followup, allelic effect sizes and 95% confidence intervals are plotted for each study analysed. Meta-analyses for discovery studies combined, for followup studies combined, and for all studies combined, are plotted as diamond symbols, with a vertical dashed line for the effect size estimate from all studies combined. Numerical values for the allelic effect size ( $\beta$ ) and standard error after genomic control was applied (SE.GC) are given. Results are shown only for the primary phenotype for each SNP.

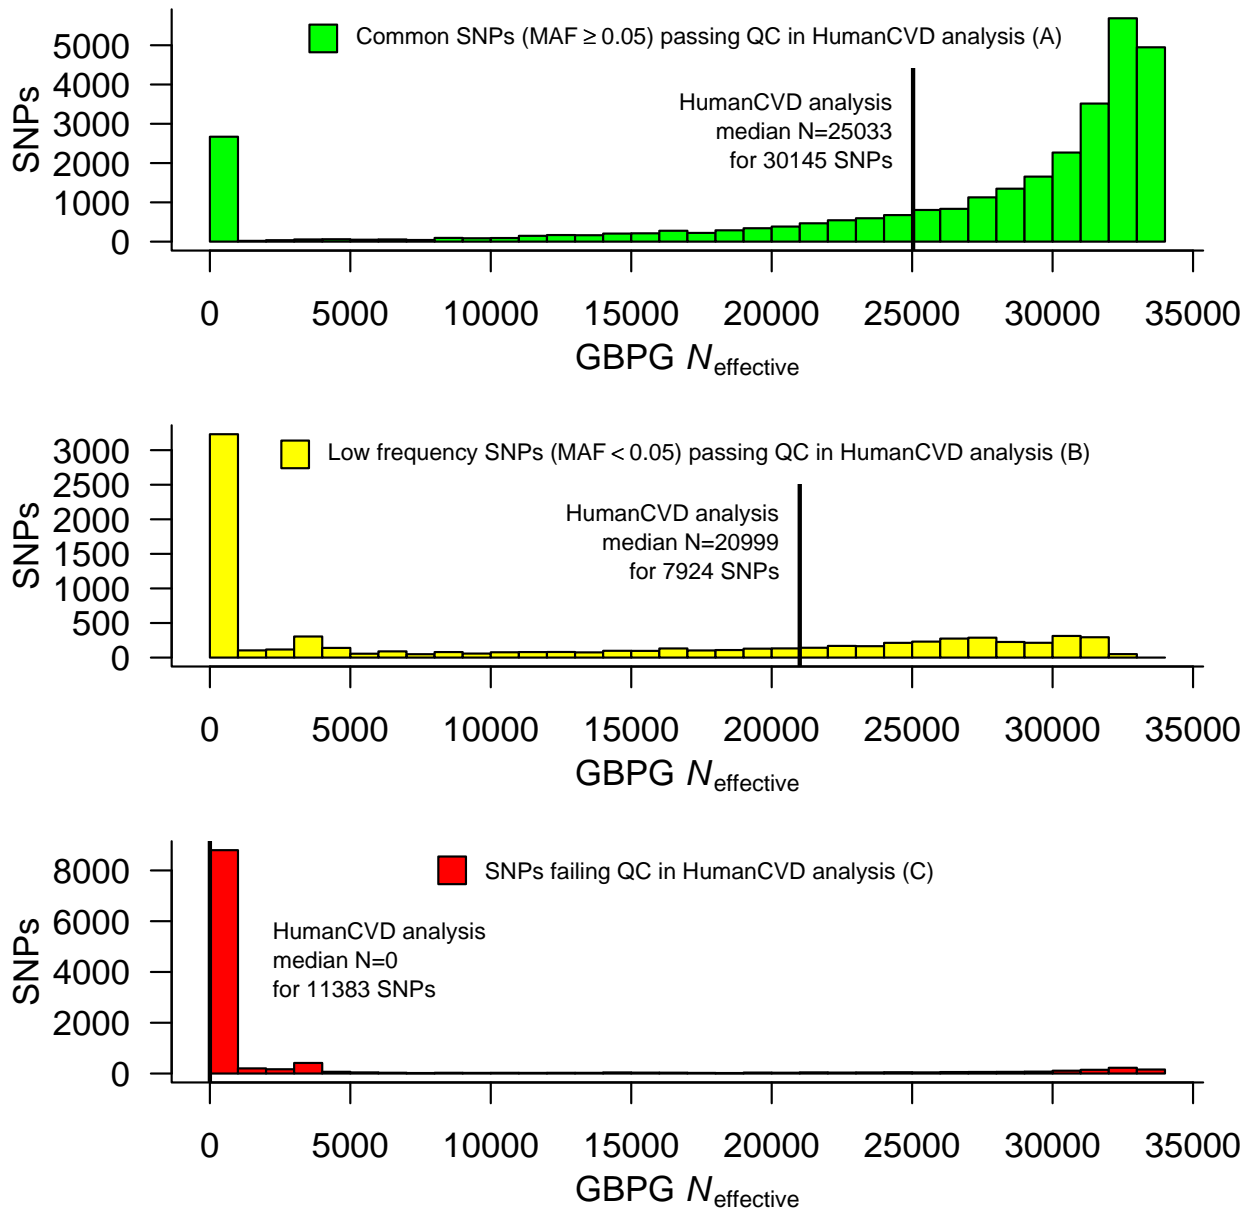

Fig. S10: **Coverage of HumanCVD BeadChip content by standard GWAS meta-analysis.** Coverage of the 49,452 SNPs genotyped on the HumanCVD BeadChip was measured using the Global BPgen (GBPG; Newton-Cheh *et al.* 2009) meta-analysis effective sample size ( $N_{\text{effective}}$ ), which is typical of standard GWAS meta-analyses. SNPs that are on the HumanCVD BeadChip but were not analysed by GBPG because they are not present in the HapMap versions used for genotype imputation have GBPG  $N_{\text{effective}} = 0$ . Common SNPs successfully genotyped on the HumanCVD BeadChip (median  $N = 25,033$ ) are mostly well-covered by standard GWAS meta-analysis (panel A; 86% have GBPG  $N_{\text{effective}} \geq 0.5N_{\text{total}}$ ). Low frequency SNPs successfully genotyped on the HumanCVD BeadChip (median  $N = 20,999$ ) are not well-covered by standard GWAS meta-analysis (panel B; 39% have GBPG  $N_{\text{effective}} \geq 0.5N_{\text{total}}$ ). SNPs failing QC in our analysis (median  $N = 0$ ) are not well-covered by standard GWAS meta-analysis (panel C), mostly because they are monomorphic in populations of European ancestry.

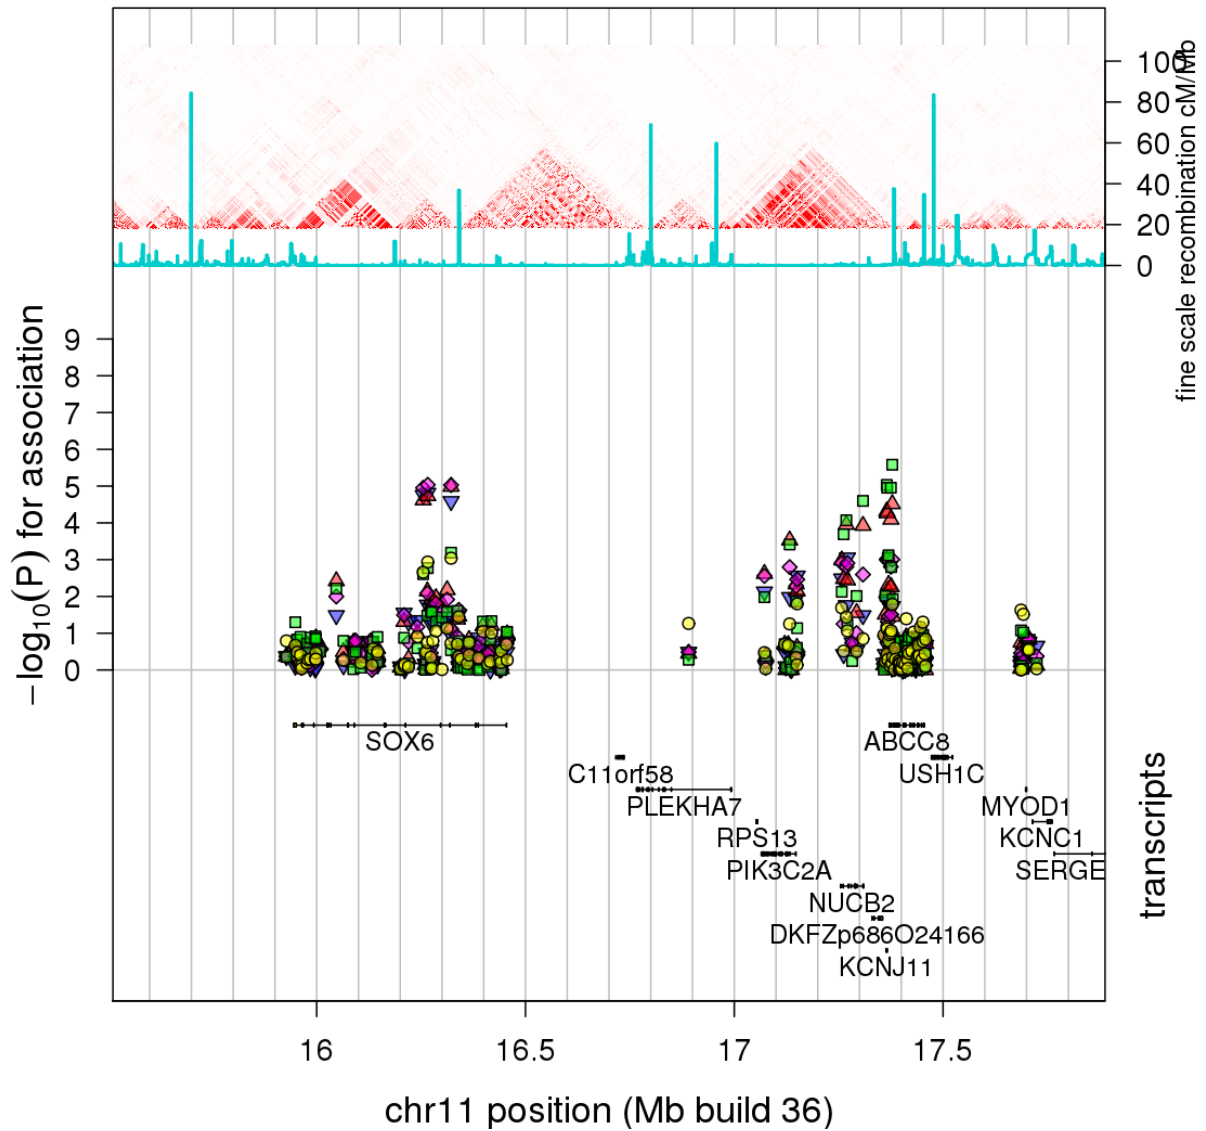

Fig. S11: **Regional association plot for chromosomal region 11p15.2-11p15.1.** The previously reported association at the PLEKHA7 locus (Levy *et al.* 2009) was rs381815 at 16,858,844 Mb, in a different LD block to the signals at the SOX6 and NUCB2-ABCC8 loci identified in our discovery analysis. (Note only the signal at the SOX6 locus was significant in combined discovery and followup data). See legend to main Figure 2 for further explanation of figure elements.

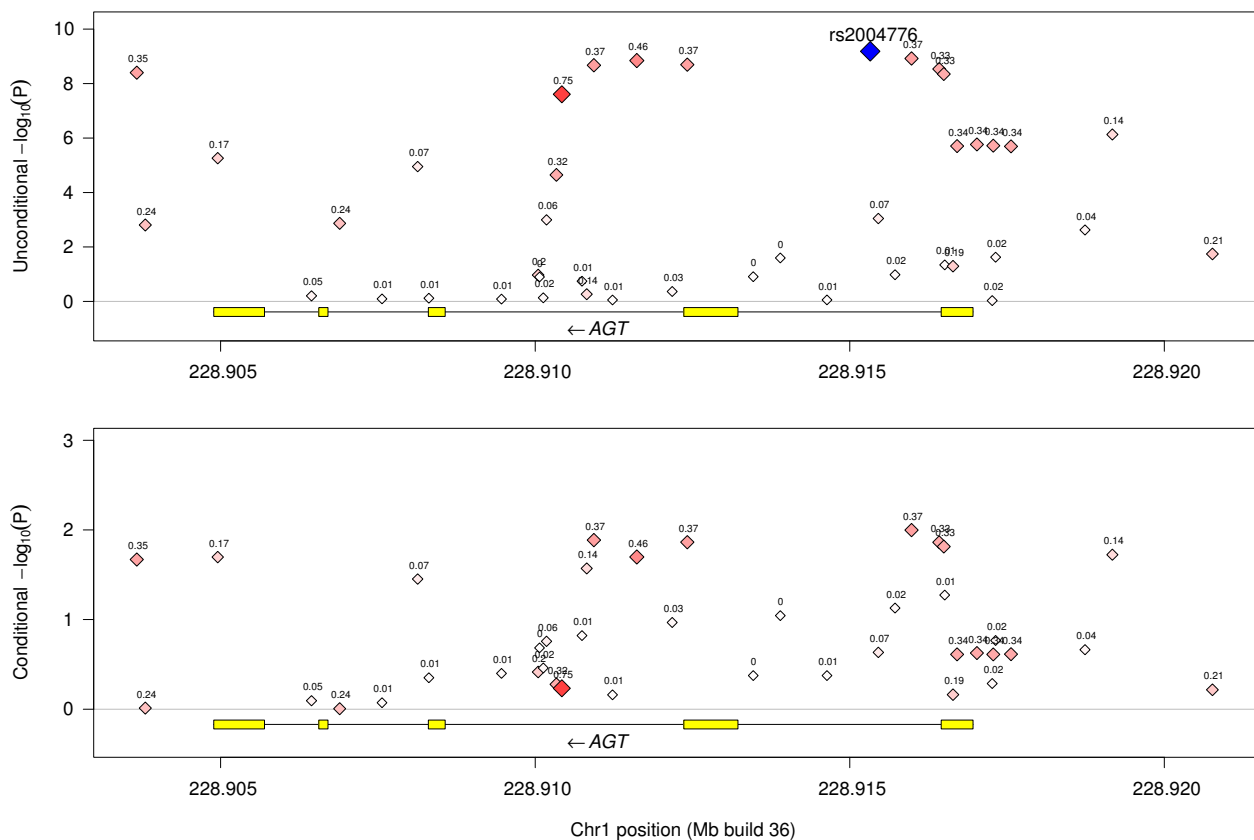

Fig. S12: **Regional association plot at the *AGT* locus.** Individual SNP association  $P$ -values are plotted for analyses without (upper panel) and with (lower panel) conditioning on the most significantly associated SNP at this locus. For SNPs in the local region around the *AGT* transcript (shown for reference, with exons drawn as yellow blocks), we performed a conditional analysis for dichotomous hypertension (the most significantly associated phenotype), conditioning on the most significantly associated SNP in our discovery meta-analysis, rs2004776 (plotted in blue in upper panel). The conditional meta-analysis was identical to unconditional discovery meta-analysis, except that each study included rs2004776 genotype as an additional covariate (coded 0/1/2). In both panels, symbols for each SNP are coloured and annotated according to the pairwise LD with rs2004776 ( $r^2 = 0$  white;  $r^2 = 1$  red). There are 41 SNPs excluding rs2004776 that passed QC in our discovery analysis in this local region, and in the conditional analysis no SNPs reached a significance threshold  $P < 0.05/41 = 0.0012$  at which we could declare a significant secondary signal at this locus.



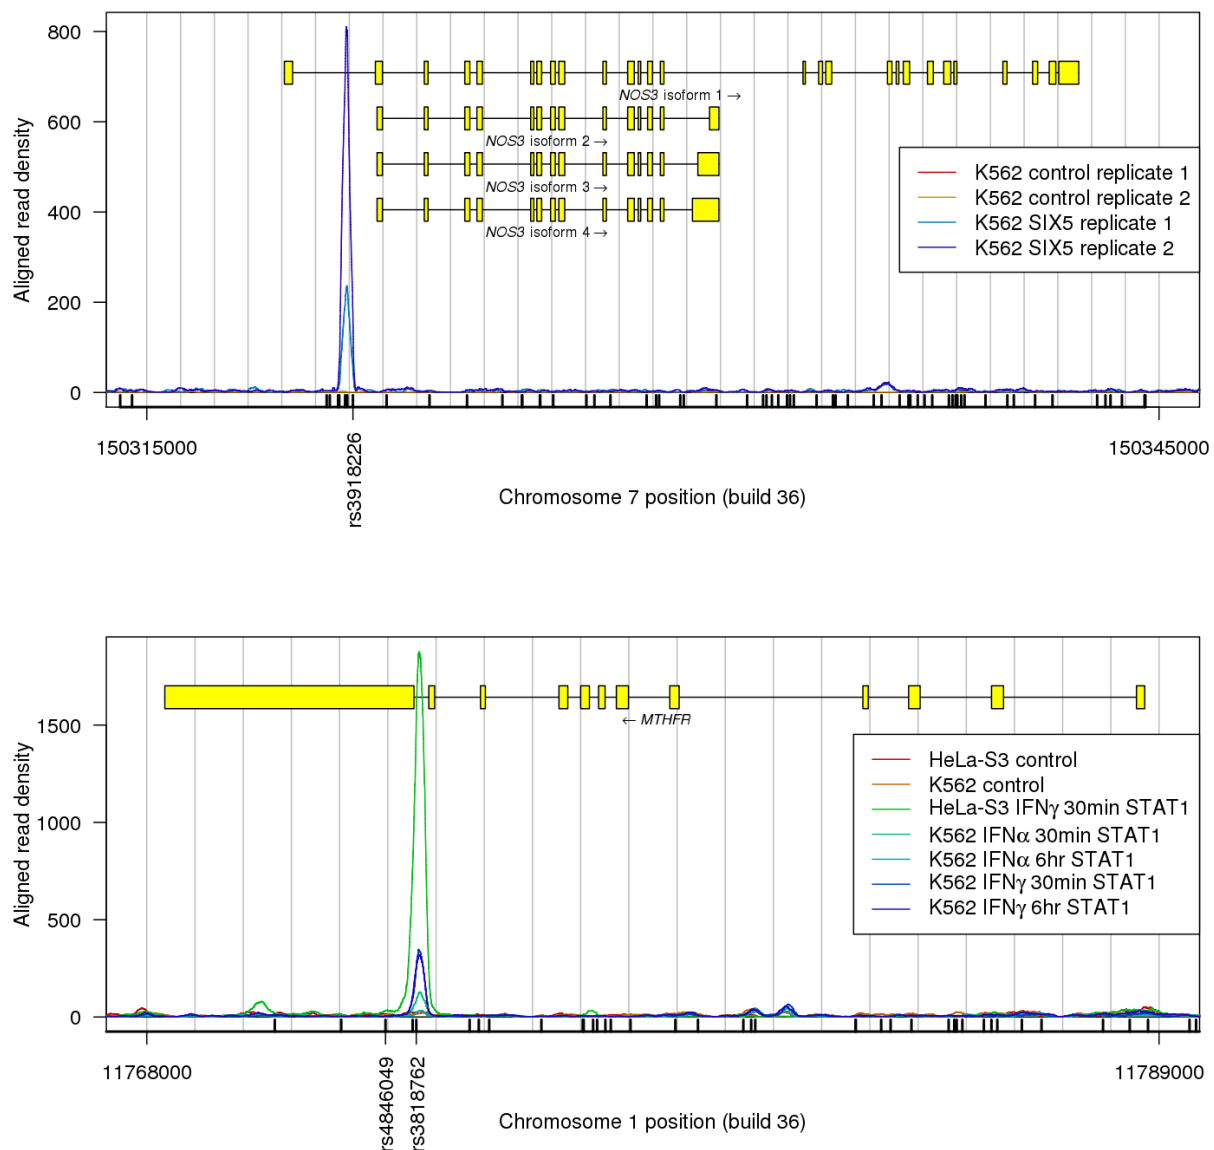

Fig. S13: **Density of aligned reads from ChIP-Seq experiments.** The density of aligned reads from chromatin immunoprecipitation followed by tag sequencing (ChIP-Seq) is plotted in the context of SNPs significantly associated with BP, and gene structure with exons (coding and untranslated) drawn as yellow blocks. Grey vertical lines are plotted every 1Kb and small ticks above the x-axis represent all SNPs on the HumanCVD BeadChip. The upper panel shows data from experiments in K562 cell lines, for controls with no IP and for experiments using an antibody against the *SIX5* transcription factor (Euskirchen *et al.* 2007, Rozowsky *et al.* 2009), relative to the only significantly associated SNP at this locus in our data (rs3918226). Note the first exon of *NOS3* isoform 1 is untranslated. The lower panel shows data from experiments in HeLa-S3 and K562 cell lines, for controls with no IP and for experiments with IFN $\alpha$  and IFN $\gamma$  growth factor treatments and using an antibody against the growth factor responsive *STAT1* transcription activator (Johnson *et al.* 2007, Valouev *et al.* 2008, Zhang *et al.* 2008), relative to the most significantly associated SNP at this locus in our data (rs4846049;  $P = 6.7 \times 10^{-8}$  for DBP) and a less significantly associated SNP (rs3818762;  $P = 5.8 \times 10^{-7}$  for DBP).

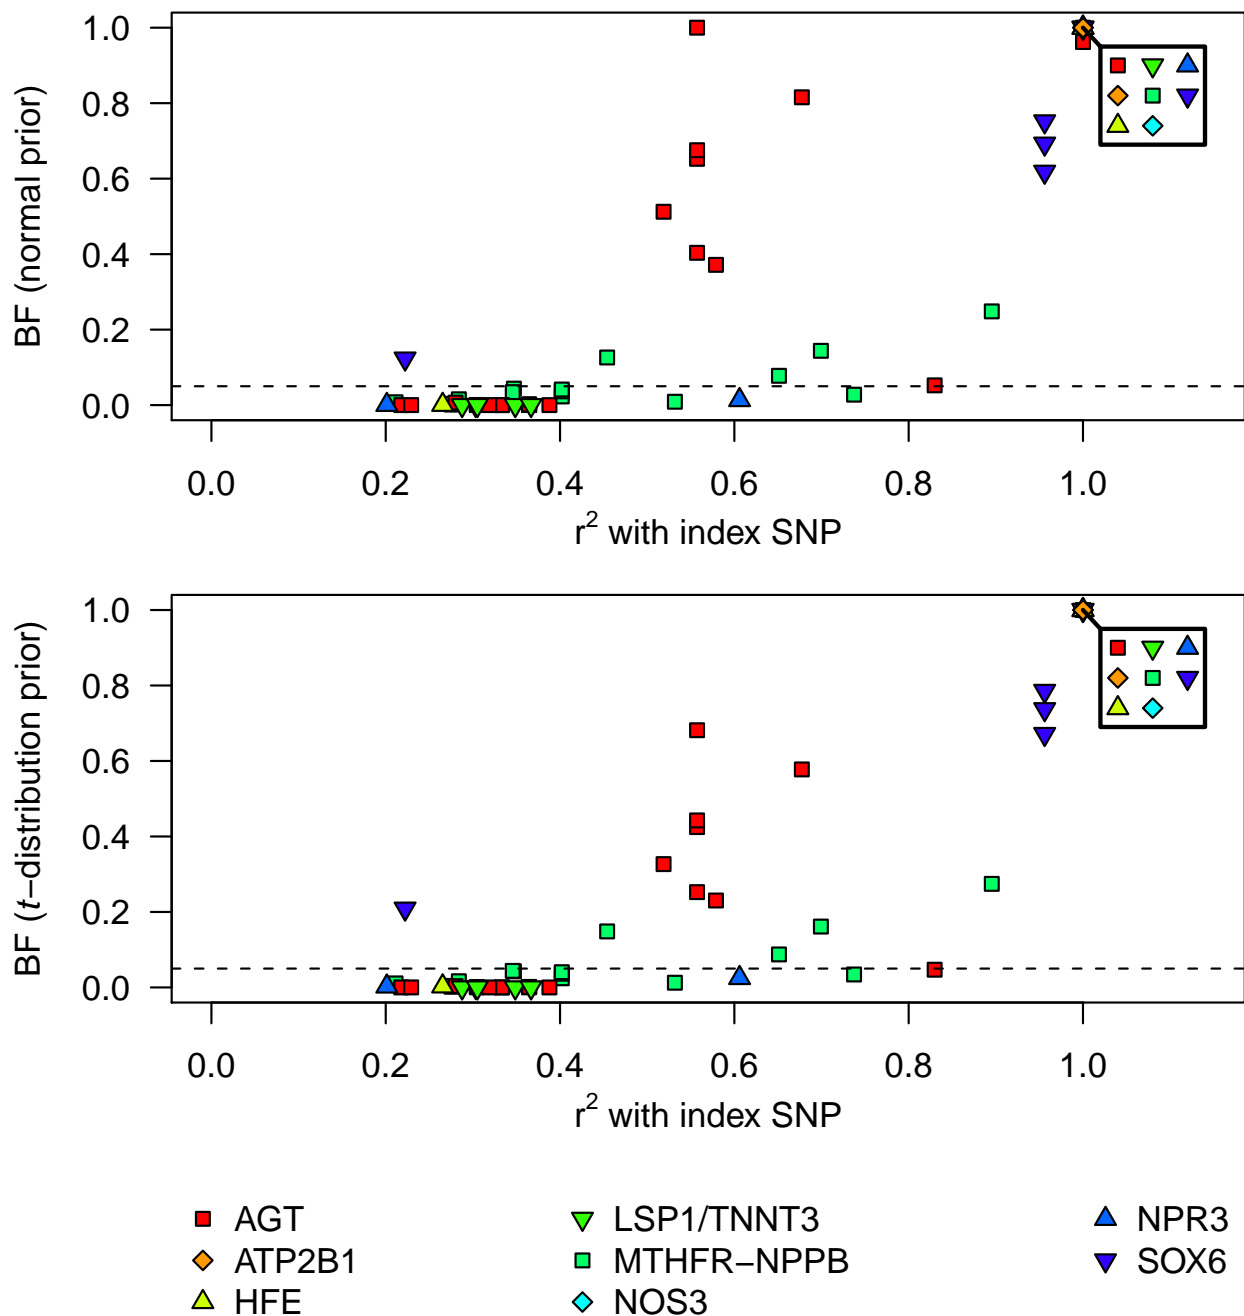

Fig. S14: **Relationship between Bayes Factors and pairwise LD.** SNPs in Table S13 at the eight loci discovered here are plotted by Bayes Factor (BF) and by pairwise LD ( $r^2$ ) with the index SNP at their locus, with the BF calculated assuming a normal prior (upper panel) and assuming a  $t$ -distribution prior (lower panel) on effect sizes. For each locus there is (at least) one SNP with  $BF \simeq 1$  and  $r^2 = 1$ . The BF is a model based, theoretically sound and interpretable criterion for excluding that SNPs cannot credibly be the sole causal variant at each locus. We use  $BF < 0.05$  (horizontal dashed line) as our operational criterion. Pairwise  $r^2$  is widely used as a criterion for similar purposes but is not theoretically well grounded. In our data we see SNPs with pairwise  $r^2$  as low as 0.2 that have BF high enough that they cannot credibly be excluded as potential causal variants.

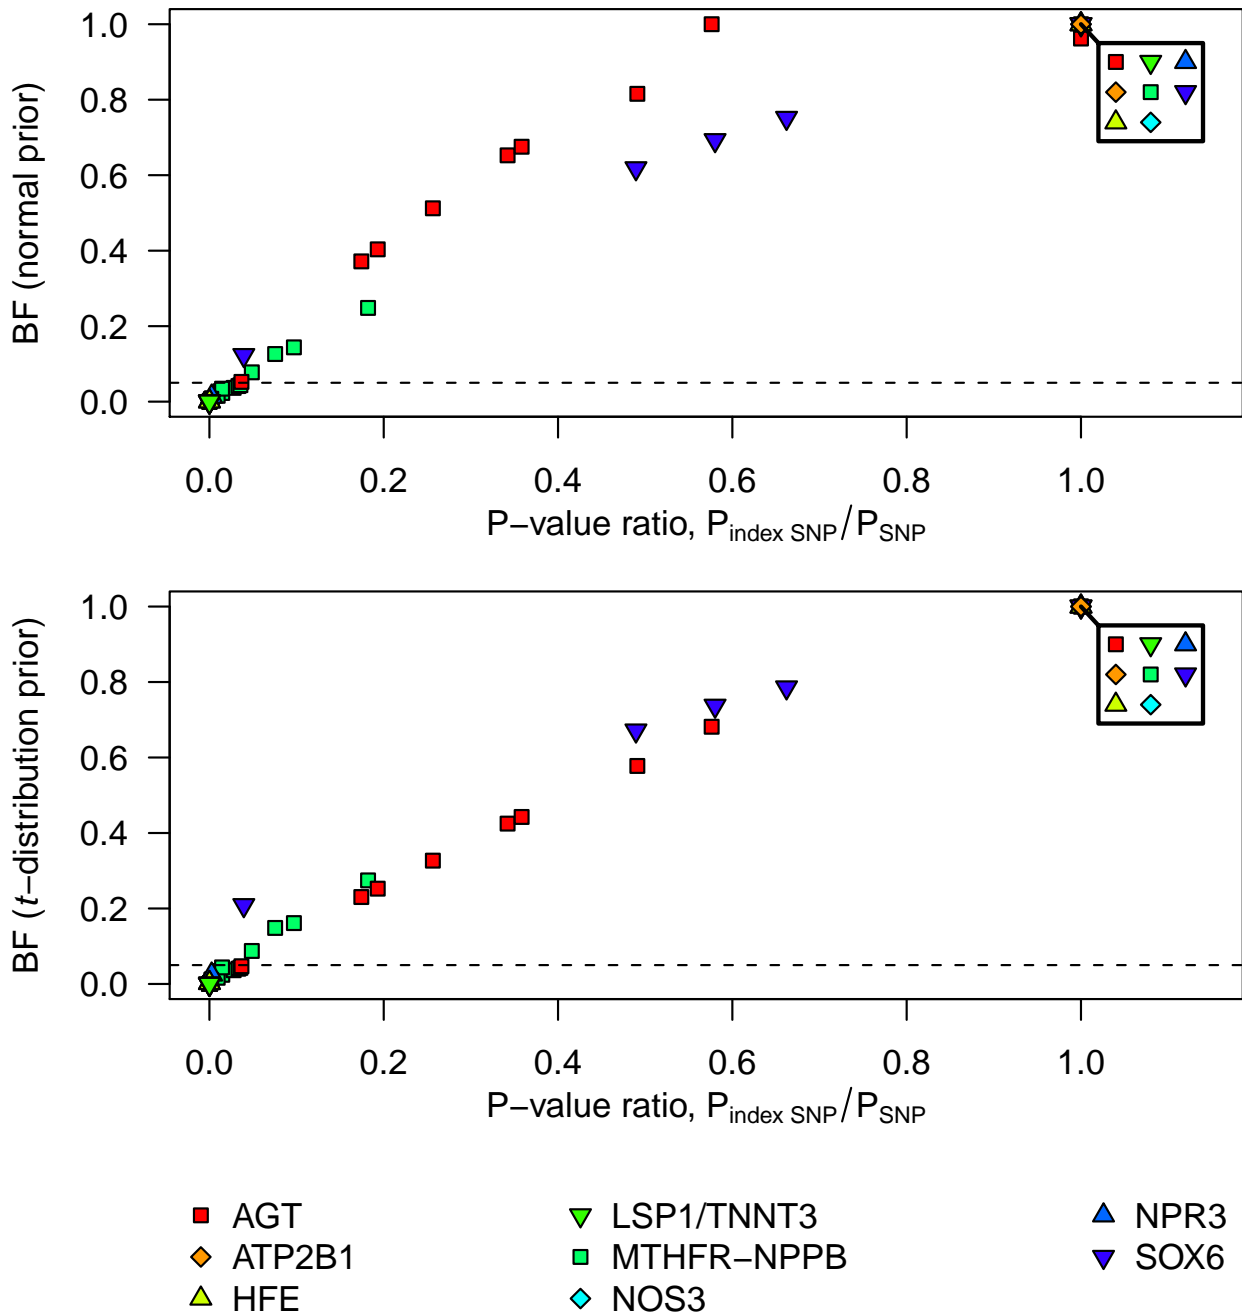

Fig. S15: **Relationship between Bayes Factors and  $P$  values.** SNPs in Table S13 at the eight loci discovered here are plotted by Bayes Factor (BF) and by  $P$ -value ratio relative to the index SNP at their locus, with the BF calculated assuming a normal prior (upper panel) and assuming a  $t$ -distribution prior (lower panel) on effect sizes. For the  $t$ -distribution prior the relationship is roughly linear, and hence our operational criterion for excluding that SNPs cannot credibly be the sole causal variant at each locus,  $\text{BF} < 0.05$  (horizontal dashed line), is roughly equivalent to excluding SNPs with  $P$ -values  $> 20\times$  greater (less significant) than the index SNP, when data from the same individuals (and hence same total  $N$ ) are analysed for all SNPs at each locus.

## 2 Supplemental Tables

### List of Tables

|     |                                                                                       |    |
|-----|---------------------------------------------------------------------------------------|----|
| S1  | Demographic data for discovery and followup cohorts . . . . .                         | 21 |
| S2  | Recruitment and phenotyping for discovery and followup cohorts . . . . .              | 22 |
| S3  | Genotyping quality control and association . . . . .                                  | 28 |
| S4  | Estimates of non-ascertained phenotypic SDs for ascertained studies . . . . .         | 32 |
| S5  | Inter-trait test statistic correlation matrix . . . . .                               | 33 |
| S6  | Effective number of tests by chromosome . . . . .                                     | 34 |
| S7  | Discovery results for top 10 SNPs and 5 BP phenotypes . . . . .                       | 35 |
| S8  | Followup results for top 10 SNPs and 5 BP phenotypes . . . . .                        | 36 |
| S9  | Discovery and followup combined results for top 10 SNPs and 5 BP phenotypes . . . . . | 37 |
| S10 | Low frequency variant associations tested using gene dosage model . . . . .           | 38 |
| S11 | CNV tag-SNP results . . . . .                                                         | 40 |
| S12 | Association results for previously reported SNPs . . . . .                            | 41 |
| S13 | Identification of credibly causal SNPs . . . . .                                      | 44 |
| S14 | <i>LSP1</i> p.[Ala38Thr, Ala100Thr] non-synonymous SNP . . . . .                      | 48 |
| S15 | Individual TFBS containing credibly causal SNPs . . . . .                             | 49 |
| S16 | eSNP analyses in monocytes and the whole blood and tissue panel . . . . .             | 52 |
| S17 | MTHFR-NPPB locus conditional analysis . . . . .                                       | 53 |

Table S1: Demographic data for discovery and followup cohorts.

| Cohort <sup>a</sup>                                            | <i>N</i> <sup>b</sup> | Female [%] | Age [years] | (SD) [years] | BMI [kg/m <sup>2</sup> ] | (SD) [kg/m <sup>2</sup> ] | SBP [mmHg] | (SD) [mmHg] | DBP [mmHg] | (SD) [mmHg] | MAP [mmHg] | (SD) [mmHg] | PP [mmHg] | (SD) [mmHg] | BP med. <sup>c</sup> [%] | HTN <sup>d</sup> [%] |
|----------------------------------------------------------------|-----------------------|------------|-------------|--------------|--------------------------|---------------------------|------------|-------------|------------|-------------|------------|-------------|-----------|-------------|--------------------------|----------------------|
| <b>Discovery studies, Ascertained cohorts</b>                  |                       |            |             |              |                          |                           |            |             |            |             |            |             |           |             |                          |                      |
| AIBII (controls)                                               | 458                   | 54.4       | 52.8        | (9.2)        | 25.7                     | (3.6)                     | 119.9      | (13.7)      | 75.4       | (7.6)       | 90.2       | (7.6)       | 44.5      | (10.3)      | 0                        | 10.3                 |
| ASCOT (cases)                                                  | 1239                  | 18.1       | 63.0        | (8.1)        | 29.1                     | (4.6)                     | 161.4      | (17.8)      | 92.9       | (9.9)       | 115.7      | (10.6)      | 68.5      | (16.1)      | 89.2                     | 100                  |
| BRIGHT (cases)                                                 | 1919                  | 59.6       | 58.0        | (10.3)       | 27.4                     | (3.8)                     | 154.3      | (21.1)      | 93.9       | (11.3)      | 114.0      | (13.3)      | 60.4      | (15.7)      | 92.5                     | 100                  |
| BRIGHT (controls)                                              | 1735                  | 62.7       | 58.7        | (8.9)        | 25.3                     | (3.3)                     | 123.0      | (10.5)      | 76.4       | (7.2)       | 91.9       | (7.5)       | 46.7      | (8.3)       | 0                        | 0                    |
| MDC (controls)                                                 | 1846                  | 58.2       | 57.8        | (5.9)        | 24.3                     | (3.3)                     | 115.6      | (5.8)       | 73.6       | (5.3)       | 87.6       | (4.7)       | 42.0      | (6.0)       | 0                        | 0                    |
| NBS (controls)                                                 | 2352                  | 50.3       | 41.4        | (12.4)       | NA                       | NA                        | NA         | NA          | NA         | NA          | NA         | NA          | NA        | NA          | NA                       | NA                   |
| NORDIL (cases)                                                 | 1919                  | 51.0       | 56.0        | (4.0)        | 28.3                     | (4.6)                     | 177.3      | (14.6)      | 105.9      | (5.5)       | 129.7      | (7.1)       | 71.5      | (13.6)      | 0 <sup>e</sup>           | 100                  |
| <b>Discovery studies, Non-ascertained (population) cohorts</b> |                       |            |             |              |                          |                           |            |             |            |             |            |             |           |             |                          |                      |
| BWHHS                                                          | 3373                  | 100        | 68.9        | (5.5)        | 27.3                     | (6.0)                     | 146.5      | (26.6)      | 79.2       | (12.9)      | 102.0      | (15.0)      | 67.6      | (19.0)      | 30.2                     | 61.4                 |
| GRAPHIC                                                        | 2024                  | 49.6       | 39.3        | (14.5)       | 26.1                     | (4.6)                     | 127.1      | (17.8)      | 79.1       | (11.0)      | 95.1       | (12.5)      | 48.0      | (11.9)      | 6.7                      | 28.5                 |
| PROCARDIS                                                      | 3198                  | 51.1       | 59.3        | (9.9)        | 26.8                     | (4.4)                     | 130.8      | (17.1)      | 79.6       | (10.0)      | 96.7       | (11.2)      | 51.1      | (13.4)      | 19.3                     | 43.9                 |
| WHII                                                           | 5055                  | 36.5       | 60.9        | (6.0)        | 26.7                     | (4.3)                     | 128.1      | (16.7)      | 74.6       | (10.5)      | 92.4       | (11.8)      | 53.5      | (11.2)      | 22.8                     | 39.0                 |
| <b>Followup studies, Ascertained cohorts</b>                   |                       |            |             |              |                          |                           |            |             |            |             |            |             |           |             |                          |                      |
| HYPERGEINES (cases)                                            | 1828                  | 33.5       | 48.5        | (9.6)        | 27.2                     | (3.9)                     | 150.8      | (15.4)      | 96.6       | (10.2)      | 116.4      | (9.4)       | 54.9      | (11.0)      | 14.8                     | 100                  |
| HYPERGEINES (controls)                                         | 1722                  | 40.1       | 60.9        | (8.8)        | 25.6                     | (3.6)                     | 123.4      | (9.0)       | 77.5       | (6.2)       | 92.8       | (6.3)       | 45.9      | (7.7)       | 0                        | 0                    |
| HYPEST (cases)                                                 | 715                   | 59.6       | 50.8        | (13.2)       | 27.6                     | (3.8)                     | 149.3      | (17.5)      | 91.1       | (10.4)      | 114.6      | (11.6)      | 59.9      | (14.0)      | 35.1                     | 100                  |
| HYPEST (controls)                                              | 489                   | 74.6       | 38.7        | (9.1)        | 24.4                     | (3.3)                     | 126.9      | (7.9)       | 79.5       | (5.7)       | 95.3       | (5.7)       | 47.4      | (6.7)       | 0                        | 0                    |
| OHGS (cases)                                                   | 2234                  | 35.9       | 52.1        | (7.2)        | 29.7                     | (5.4)                     | 138.0      | (18.7)      | 82.7       | (11.9)      | NA         | NA          | NA        | NA          | 53.1                     | 59.4                 |
| OHGS (controls)                                                | 1522                  | 47.8       | 72.6        | (5.2)        | 25.8                     | (4.0)                     | 124.5      | (10.0)      | 73.5       | (7.7)       | NA         | NA          | NA        | NA          | 0                        | 0                    |
| <b>Followup studies, Non-ascertained (population) cohorts</b>  |                       |            |             |              |                          |                           |            |             |            |             |            |             |           |             |                          |                      |
| BRHS                                                           | 3945                  | 0          | 68.8        | (5.5)        | 26.9                     | (3.7)                     | 149.1      | (24.2)      | 85.2       | (11.2)      | 106.5      | (14.2)      | 64.0      | (18.4)      | 28.0                     | 73.5                 |
| EAS                                                            | 904                   | 50.4       | 64.3        | (5.6)        | 25.5                     | (3.8)                     | 143.0      | (23.5)      | 77.1       | (12.2)      | 99.1       | (14.3)      | 65.8      | (18.9)      | 12.5                     | 54.1                 |
| ELSA                                                           | 4643                  | 54.4       | 66.2        | (9.1)        | 27.8                     | (4.7)                     | 134.9      | (18.5)      | 75.3       | (10.9)      | 95.2       | (12.0)      | 59.6      | (14.9)      | 14.0                     | 45.0                 |
| INTERGENE                                                      | 2845                  | 53.6       | 51.0        | (13.5)       | 26.0                     | (4.0)                     | 131.7      | (21.5)      | 82.2       | (10.5)      | 98.7       | (12.9)      | 49.5      | (16.6)      | 12.23                    | 41.4                 |
| MRC NSHD                                                       | 2269                  | 49.4       | 53.0        | (0)          | 27.3                     | (4.5)                     | 136.2      | (19.7)      | 84.6       | (12.1)      | 103.4      | (14.9)      | 52.3      | (13.9)      | 13.8                     | 49.9                 |
| NPHSII                                                         | 2775                  | 0          | 56.1        | (3.4)        | 26.5                     | (3.5)                     | 138.5      | (19.1)      | 84.6       | (11.2)      | 102.5      | (12.9)      | 53.8      | (14.3)      | 8.5                      | 52.9                 |

Notes: **a.** Demographics are presented by cohort, identified by the short names defined in Table S2. For the ascertained studies demographics are presented separately for hypertensive case cohorts and for control cohorts, but for the non-ascertained studies each consisting of a single cohort, demographics are presented for all individuals combined. **b.** Number of samples analysed, i.e. with both genotype and phenotype data. **c.** Percentage of individuals taking antihypertensive or BP lowering medication, when BP was measured. **d.** Percentage of hypertensive individuals (defined as SBP  $\geq$  140mmHg, or DBP  $\geq$  90mmHg, or taking antihypertensive or BP lowering medication for any reason). **e.** No medication for two weeks prior to when BP was measured.

Table S2: **Recruitment, ascertainment and phenotyping.** We describe criteria used to ascertain individuals on the basis of BP values (including age limits at which the values must have been observed), other ascertainment criteria, and methods of BP measurement.

| Study                                      | Details                                                                                                                                                                                                                                                                                                                                                                                        |
|--------------------------------------------|------------------------------------------------------------------------------------------------------------------------------------------------------------------------------------------------------------------------------------------------------------------------------------------------------------------------------------------------------------------------------------------------|
| <b>AIBIII:</b> Controls from the           | <b>Allied Irish Bank (AIBIII) study</b>                                                                                                                                                                                                                                                                                                                                                        |
| <b>BP ascertainment:</b>                   | $\leq 160\text{mmHg}$ SBP and $\leq 90\text{mmHg}$ DBP.                                                                                                                                                                                                                                                                                                                                        |
| <b>Other ascertainment:</b>                | Current and retired bank employees and spouses; 18–80 years of age; recruited between June 2003 and June 2004; had suffered no cardiovascular events; were not taking any vasoactive medication; Caucasian; Irish.                                                                                                                                                                             |
| <b>BP measurement:</b>                     | Sitting clinic BP, measured from the right arm using a regularly calibrated validated Omron HEM-705CP instrument (Omron Healthcare Inc., Vernon Hills, IL); measured in the brachial artery 3 times at 5 minute intervals; the mean of the last 2 measurements was used for this work.                                                                                                         |
| <b>ASCOT:</b> Hypertensive cases from the  | <b>Anglo-Scandinavian Cardiac Outcomes Trial</b>                                                                                                                                                                                                                                                                                                                                               |
| <b>BP ascertainment:</b>                   | $\geq 160\text{mmHg}$ SBP or $\geq 100\text{mmHg}$ DBP untreated; or $\geq 140\text{mmHg}$ SBP or $\geq 90\text{mmHg}$ DBP treated with one or more antihypertensive therapy.                                                                                                                                                                                                                  |
| <b>Other ascertainment:</b>                | ASCOT participants recruited in UK and Ireland; $\geq 40$ years of age; $\geq 3$ additional cardiovascular risk factors (Sever <i>et al.</i> 2001).                                                                                                                                                                                                                                            |
| <b>Exclusions:</b>                         | As detailed by Sever <i>et al.</i> (2001), including: contraindications to antihypertensive therapies; secondary or malignant hypertension; previous clinical myocardial infarction or current treated angina; cerebrovascular event within previous 3 months; heart failure; uncontrolled arrhythmias; clinically important haematological or biochemical abnormalities.                      |
| <b>BP measurement:</b>                     | Measured seated, 3 times using an Omron HEM-705CP instrument at the trial randomisation visit; the mean of the 2nd and 3rd measurements was used for this work.                                                                                                                                                                                                                                |
| <b>References:</b>                         | Sever <i>et al.</i> (2001, 2003), Dahlöf <i>et al.</i> (2005)                                                                                                                                                                                                                                                                                                                                  |
| <b>BRIGHT:</b> Hypertensive cases from the | <b>BRITish Genetics of HyperTension study</b>                                                                                                                                                                                                                                                                                                                                                  |
| <b>BP ascertainment:</b>                   | $\geq 150\text{mmHg}$ SBP and $\geq 100\text{mmHg}$ DBP for a single reading; or $\geq 145\text{mmHg}$ SBP and $\geq 95\text{mmHg}$ DBP for 3 consecutive readings on a single visit; prior to 50 years of age.                                                                                                                                                                                |
| <b>Other ascertainment:</b>                | From families with more than 1 hypertensive affected sibling (by definition above); 1 individual from each family was used for this work; recruited from 6 UK geographical regions.                                                                                                                                                                                                            |
| <b>Exclusions:</b>                         | BMI $> 35$ ; diabetes; secondary hypertension; co-existing illness.                                                                                                                                                                                                                                                                                                                            |
| <b>BP measurement:</b>                     | Clinic BP was measured in triplicate by trained research nurses, in the seated position, after at least 5 minutes rest and having refrained from smoking and exercise, using an Omron HEM-705CP instrument with an appropriate size cuff applied on the non-dominant arm, with an interval of at least 3 minutes between readings. The mean of the 2nd and 3rd readings was used in this work. |
| <b>References:</b>                         | Caulfield <i>et al.</i> (2003), Wellcome Trust Case Control Consortium (2007)                                                                                                                                                                                                                                                                                                                  |
| <b>BRIGHT:</b> Controls from the           | <b>BRITish Genetics of HyperTension study</b>                                                                                                                                                                                                                                                                                                                                                  |
| <b>BP Ascertainment:</b>                   | $\leq 140\text{mmHg}$ SBP and $\leq 90\text{mmHg}$ DBP and not taking any antihypertensive medications.                                                                                                                                                                                                                                                                                        |
| <b>Other ascertainment:</b>                | From similar UK geographical regions as the BRIGHT hypertensive cases                                                                                                                                                                                                                                                                                                                          |
| <b>BP measurement:</b>                     | Identically as for the BRIGHT cases (above).                                                                                                                                                                                                                                                                                                                                                   |
| <b>References:</b>                         | Newhouse <i>et al.</i> (2009)                                                                                                                                                                                                                                                                                                                                                                  |

| Study                                                                                                                                                 | Details                                                                                                                                                                                                                                                                                                                                                                                 |
|-------------------------------------------------------------------------------------------------------------------------------------------------------|-----------------------------------------------------------------------------------------------------------------------------------------------------------------------------------------------------------------------------------------------------------------------------------------------------------------------------------------------------------------------------------------|
| <b>MDC:</b> Controls from the <b>M</b> almö <b>D</b> iet and <b>C</b> ancer study                                                                     |                                                                                                                                                                                                                                                                                                                                                                                         |
| <b>BP ascertainment:</b>                                                                                                                              | $\leq 120$ mmHg SBP and $\leq 80$ mmHg DBP and not on any antihypertensive medication.                                                                                                                                                                                                                                                                                                  |
| <b>Other ascertainment:</b>                                                                                                                           | At least 50 years of age; free from cardiovascular events (coronary events and stroke) during 10 years of followup.                                                                                                                                                                                                                                                                     |
| <b>BP measurement:</b>                                                                                                                                | In the recumbent position, after 5–10 minutes rest, using a manual sphygmomanometer.                                                                                                                                                                                                                                                                                                    |
| <b>References:</b>                                                                                                                                    | Berglund <i>et al.</i> (1993), Kathiresan <i>et al.</i> (2008)                                                                                                                                                                                                                                                                                                                          |
| <b>NBS:</b> Controls from the <b>N</b> ational <b>B</b> lood <b>S</b> ervice                                                                          |                                                                                                                                                                                                                                                                                                                                                                                         |
| <b>BP ascertainment:</b>                                                                                                                              | None (no measures available).                                                                                                                                                                                                                                                                                                                                                           |
| <b>Other ascertainment:</b>                                                                                                                           | Blood donors in the UK.                                                                                                                                                                                                                                                                                                                                                                 |
| <b>NORDIL:</b> Hypertensive cases from the <b>N</b> ORDic <b>D</b> iltiazem trial                                                                     |                                                                                                                                                                                                                                                                                                                                                                                         |
| <b>BP ascertainment:</b>                                                                                                                              | $\geq 160$ mmHg SBP and $\geq 100$ mmHg DBP, for at least 2 consecutive measurements, at less than 63 years of age.                                                                                                                                                                                                                                                                     |
| <b>Other ascertainment:</b>                                                                                                                           | NORDIL trial participants.                                                                                                                                                                                                                                                                                                                                                              |
| <b>BP measurement:</b>                                                                                                                                | Measured at the trial randomisation visit (1992–1999), after antihypertensive medication had been withdrawn for a 2 week period.                                                                                                                                                                                                                                                        |
| <b>References:</b>                                                                                                                                    | Hansson <i>et al.</i> (2000)                                                                                                                                                                                                                                                                                                                                                            |
| <b>BWHHS:</b> The <b>B</b> ritish <b>W</b> omens <b>H</b> eart and <b>H</b> ealth <b>S</b> tudy                                                       |                                                                                                                                                                                                                                                                                                                                                                                         |
| <b>BP ascertainment:</b>                                                                                                                              | None.                                                                                                                                                                                                                                                                                                                                                                                   |
| <b>Other ascertainment:</b>                                                                                                                           | Female; Consent for genetic testing.                                                                                                                                                                                                                                                                                                                                                    |
| <b>Exclusions:</b>                                                                                                                                    | Defined by the examining nurse as non-white.                                                                                                                                                                                                                                                                                                                                            |
| <b>BP measurement:</b>                                                                                                                                | A Dinamap 1846SX vital signs monitor was used. Arm circumference was measured and the appropriate cuff size was used. Measurements were taken twice in succession, using the right arm, with the participant seated and the arm supported on a cushion. Since the Dinamap 1846SX is known to systematically overestimate SBP by 8mmHg, this was subtracted from values before analysis. |
| <b>References:</b>                                                                                                                                    | <a href="http://www.lshtm.ac.uk/eph/ncde/research/bwhhs">http://www.lshtm.ac.uk/eph/ncde/research/bwhhs</a>                                                                                                                                                                                                                                                                             |
| <b>GRAPHIC:</b> The <b>G</b> enetic <b>R</b> egulation of <b>A</b> rterial <b>P</b> ressure of <b>H</b> umans <b>I</b> n the <b>C</b> ommunity cohort |                                                                                                                                                                                                                                                                                                                                                                                         |
| <b>BP ascertainment:</b>                                                                                                                              | None                                                                                                                                                                                                                                                                                                                                                                                    |
| <b>Other ascertainment:</b>                                                                                                                           | Through general practices in Leicestershire (UK); nuclear families that consisted of both parents (aged 40–60 years) and two adult offspring (18 years); white European.                                                                                                                                                                                                                |
| <b>Exclusions:</b>                                                                                                                                    | Previous history of chronic kidney disease.                                                                                                                                                                                                                                                                                                                                             |
| <b>BP measurement:</b>                                                                                                                                | Clinic BP was measured in triplicate by trained research nurses using an Omron HEM-705CP instrument with an appropriate size cuff applied on the non-dominant arm, with an interval of at least 3 minutes between readings. The mean of the 2nd and 3rd readings was used in this work.                                                                                                 |
| <b>References:</b>                                                                                                                                    | Tobin <i>et al.</i> (2008)                                                                                                                                                                                                                                                                                                                                                              |
| <b>PROCARDIS:</b> The <b>P</b> Recocious <b>C</b> oronary <b>A</b> Rtery <b>D</b> ISease study                                                        |                                                                                                                                                                                                                                                                                                                                                                                         |
| <b>BP ascertainment:</b>                                                                                                                              | None.                                                                                                                                                                                                                                                                                                                                                                                   |
| <b>Other ascertainment:</b>                                                                                                                           | CAD free controls from CAD case-control study; German, Italian, Swedish and British.                                                                                                                                                                                                                                                                                                    |
| <b>BP measurement:</b>                                                                                                                                | Measured twice using various sphygmomanometers, in the seated position after at least 5 minutes rest; the second of the 2 measurements was used in this work.                                                                                                                                                                                                                           |
| <b>References:</b>                                                                                                                                    | Clarke <i>et al.</i> (2009), <a href="http://www.procardis.org">http://www.procardis.org</a>                                                                                                                                                                                                                                                                                            |

| Study                                                                                                          | Details                                                                                                                                                                                                                                                                                                                                          |
|----------------------------------------------------------------------------------------------------------------|--------------------------------------------------------------------------------------------------------------------------------------------------------------------------------------------------------------------------------------------------------------------------------------------------------------------------------------------------|
| <b>WHII: The WhiteHall II</b>                                                                                  | study                                                                                                                                                                                                                                                                                                                                            |
| <b>BP ascertainment:</b>                                                                                       | None.                                                                                                                                                                                                                                                                                                                                            |
| <b>Other ascertainment:</b>                                                                                    | Recruited between 1985 and 1989, from 20 London (UK) based civil service departments.                                                                                                                                                                                                                                                            |
| <b>BP measurement:</b>                                                                                         | Measures from phase 7 (2003–2004) of the longitudinal study; measured 3 times with participant in a seated position following a 10 minute rest period, by a nurse using an OMRON HEM-907 instrument; the mean of 3 measurements was used for this work.                                                                                          |
| <b>HYPERGENES: Hypertensive cases from the HYPERGENES European Network for Genetic-Epidemiological Studies</b> |                                                                                                                                                                                                                                                                                                                                                  |
| <b>BP ascertainment:</b>                                                                                       | > 140mmHg SBP or > 90mmHg DBP or taking antihypertensive treatment, before 50 years of age.                                                                                                                                                                                                                                                      |
| <b>Other ascertainment:</b>                                                                                    | North European, Sardinian and South European.                                                                                                                                                                                                                                                                                                    |
| <b>BP measurement:</b>                                                                                         | Using a sphygmomanometer for 3–5 times per visit for more than 1 visit; for this work, where available the last off-medication measurement was used, otherwise an on-medication measurement adjusted by +15mmHg SBP and +10mmHg DBP was used.                                                                                                    |
| <b>References:</b>                                                                                             | <a href="http://www.hypergenes.eu">http://www.hypergenes.eu</a>                                                                                                                                                                                                                                                                                  |
| <b>HYPERGENES: Controls from the HYPERGENES European Network for Genetic-Epidemiological Studies</b>           |                                                                                                                                                                                                                                                                                                                                                  |
| <b>BP ascertainment:</b>                                                                                       | ≤ 130mmHg SBP and ≤ 85mmHg DBP for all measurements during 10 years (average) followup.                                                                                                                                                                                                                                                          |
| <b>Other ascertainment:</b>                                                                                    | Healthy subjects older than 55 years of age; North European, Sardinian and South European (matched to the HYPERGENES Hypertensive cases).                                                                                                                                                                                                        |
| <b>BP measurement:</b>                                                                                         | Using a sphygmomanometer for 3–5 times per visit for more than 1 visit; for this work the earliest measurement available after age 55 was used.                                                                                                                                                                                                  |
| <b>References:</b>                                                                                             | <a href="http://www.hypergenes.eu">http://www.hypergenes.eu</a>                                                                                                                                                                                                                                                                                  |
| <b>HYPEST: The HYPertension in ESTonia study</b>                                                               |                                                                                                                                                                                                                                                                                                                                                  |
| <b>BP ascertainment:</b>                                                                                       | Mixed hypertensive individuals and general population sample; essential hypertension patients selected based on the clinical diagnosis and profile of BP specialists during the patients ambulatory visits or hospitalization at the North Estonia Medical Center, Centre of Cardiology, or at the Cardiology Clinic, Tartu University Hospital. |
| <b>Other ascertainment:</b>                                                                                    | Recruited in Estonia between 2004 and 2007; general population sample were long-term blood donors.                                                                                                                                                                                                                                               |
| <b>BP measurement:</b>                                                                                         | After resting in the seated position, measured by a trained clinician using a standard mercury column sphygmomanometer with arm circumference adjusted cuffs; median value over multiple readings (on average 4.3 per individual over a mean of 3.2 years) was used for this work                                                                |
| <b>References:</b>                                                                                             | Org <i>et al.</i> (2009)                                                                                                                                                                                                                                                                                                                         |
| <b>OHGS: Hypertensive cases from the Ottawa Heart Genomic Study</b>                                            |                                                                                                                                                                                                                                                                                                                                                  |
| <b>BP ascertainment:</b>                                                                                       | ≥ 140mmHg SBP, or ≥ 90mmHg DBP, or taking antihypertensive or BP lowering medication, before 65 years of age.                                                                                                                                                                                                                                    |
| <b>BP measurement:</b>                                                                                         | Using a Philips IntelliVue MP5 at the time of consent (before any angiography was performed) or as close to the consenting date as possible.                                                                                                                                                                                                     |
| <b>OHGS: Controls from the Ottawa Heart Genomic Study</b>                                                      |                                                                                                                                                                                                                                                                                                                                                  |
| <b>BP ascertainment:</b>                                                                                       | Not hypertensive and not currently receiving prescribed medication for hypertension, ≥ 65 years of age.                                                                                                                                                                                                                                          |
| <b>BP measurement:</b>                                                                                         | Using a Philips IntelliVue MP5 at the time of consent (before any angiography was performed) or as close to the consenting date as possible.                                                                                                                                                                                                     |



| Study                                                        | Details                                                                                                                                                                                                                                                                                                                                                                                                           |
|--------------------------------------------------------------|-------------------------------------------------------------------------------------------------------------------------------------------------------------------------------------------------------------------------------------------------------------------------------------------------------------------------------------------------------------------------------------------------------------------|
| <b>BRHS: The British Regional Heart Study</b>                |                                                                                                                                                                                                                                                                                                                                                                                                                   |
| <b>BP ascertainment:</b>                                     | None.                                                                                                                                                                                                                                                                                                                                                                                                             |
| <b>Other ascertainment:</b>                                  | Male; recruited from general practices across Great Britain from 1978-1980.                                                                                                                                                                                                                                                                                                                                       |
| <b>BP measurement:</b>                                       | At re-examination in 1998-2000 (20 years after recruitment); measured twice in succession on the right arm, with the subject seated and the arm supported, using a Dinamap 1846 oscillometric BP recorder; the mean of 2 readings was used for this work; over-reading of SBP by the instrument was corrected in the analysis and readings were adjusted for observer variation within each town                  |
| <b>References:</b>                                           | <a href="http://www.ucl.ac.uk/pcph/research-groups-themes/brhs-pub">http://www.ucl.ac.uk/pcph/research-groups-themes/brhs-pub</a>                                                                                                                                                                                                                                                                                 |
| <b>EAS: The Edinburgh Artery Study</b>                       |                                                                                                                                                                                                                                                                                                                                                                                                                   |
| <b>BP ascertainment:</b>                                     | None.                                                                                                                                                                                                                                                                                                                                                                                                             |
| <b>Other ascertainment:</b>                                  | Age stratified random sample of men and women, 55-74 years of age; selected between August 1987 and September 1988 from age-sex registers of ten general practices with a geographical and socio-economical catchment population spread throughout the city of Edinburgh, UK.                                                                                                                                     |
| <b>Exclusions:</b>                                           | Unfit to participate (e.g. due to severe mental illness or terminal disease); excluded individuals were replaced by other randomly sampled subjects.                                                                                                                                                                                                                                                              |
| <b>BP measures:</b>                                          | Performed by specially trained research nurses, using standardised operating procedures. Systolic and diastolic (phase V) BP was recorded once in the right arm, after 10 minutes rest in the supine position, using a Hawksley random zero sphygmomanometer.                                                                                                                                                     |
| <b>ELSA: The English Longitudinal Study of Ageing</b>        |                                                                                                                                                                                                                                                                                                                                                                                                                   |
| <b>BP ascertainment:</b>                                     | None.                                                                                                                                                                                                                                                                                                                                                                                                             |
| <b>Other ascertainment:</b>                                  | Over 50 years of age; recruited from the Health Surveys for England in 1998, 1999, and 2001. Genetic data were collected at wave 2 of the study (2004/5); the phenotype measurements taken at wave 2 were used for this study.                                                                                                                                                                                    |
| <b>BP measurement:</b>                                       | Participants were visited in the home; heavy physical activity, smoking, and alcohol use were avoided for 30 minutes prior to measurement; 3 measurements in the seated position following 10 minutes of rest were taken using an OMRON HEM-907 instrument by a nurse; the mean was used for this work.                                                                                                           |
| <b>GBPG: The Global BP Genetics consortium meta-analysis</b> |                                                                                                                                                                                                                                                                                                                                                                                                                   |
| <b>BP ascertainment:</b>                                     | None.                                                                                                                                                                                                                                                                                                                                                                                                             |
| <b>BP measurement:</b>                                       | As described by Newton-Cheh <i>et al.</i> (2009); dichotomous hypertension (HTN) analyses were conducted using individuals with $\geq 140$ mmHg SBP or $\geq 90$ mmHg DBP or taking antihypertensive medication as cases, and using individuals with $\leq 120$ mmHg SBP and $\leq 85$ mmHg DBP and not taking antihypertensive medication as controls, and excluding individuals not matching either definition. |
| <b>References:</b>                                           | (Newton-Cheh <i>et al.</i> 2009)                                                                                                                                                                                                                                                                                                                                                                                  |

| Study                               | Details                                                                                                                                                                                                                                                                                                                                                         |
|-------------------------------------|-----------------------------------------------------------------------------------------------------------------------------------------------------------------------------------------------------------------------------------------------------------------------------------------------------------------------------------------------------------------|
| <b>INTERGENE:</b>                   | The study of the <b>INTER</b> play between <b>GENE</b> tic susceptibility and environmental factors for the risk of chronic diseases                                                                                                                                                                                                                            |
| <b>BP ascertainment:</b>            | None.                                                                                                                                                                                                                                                                                                                                                           |
| <b>Other ascertainment:</b>         | Randomly sampled women and men 25-74 years of age and living in the Västra Götaland region of Western Sweden, between 2001 and 2004, were invited to participate.                                                                                                                                                                                               |
| <b>BP measurement:</b>              | Measured twice in the sitting position after a 5 minute rest by trained research nurses, with a validated OMROM 711 Automatic IS instrument (Golaro <i>et al.</i> 2002); the mean of 2 valid measurements was used for this work.                                                                                                                               |
| <b>References:</b>                  | Berg <i>et al.</i> (2009), Strandhagen <i>et al.</i> (2010)                                                                                                                                                                                                                                                                                                     |
| <b>MRC NSHD:</b>                    | The Medical Research Council National Survey of Health and Development                                                                                                                                                                                                                                                                                          |
| <b>BP ascertainment:</b>            | None.                                                                                                                                                                                                                                                                                                                                                           |
| <b>Other ascertainment:</b>         | Birth cohort study consisting of a stratified random sample of all births in England, Scotland and Wales in 1 week in March 1946                                                                                                                                                                                                                                |
| <b>BP measurement:</b>              | In 1999 when cohort members were 53 years of age; measured twice, seated and after 5 minutes of rest, in their own homes by research nurses using an Omron HEM-705 instrument; the 2nd reading was used for this work.                                                                                                                                          |
| <b>References:</b>                  | Wadsworth <i>et al.</i> (2006), <a href="http://www.nshd.mrc.ac.uk">http://www.nshd.mrc.ac.uk</a>                                                                                                                                                                                                                                                               |
| <b>NPHSII:</b>                      | The Northwick Park Heart Study                                                                                                                                                                                                                                                                                                                                  |
| <b>BP ascertainment:</b>            | None.                                                                                                                                                                                                                                                                                                                                                           |
| <b>Other ascertainment:</b>         | Prospective study of healthy middle-aged men, 50-64 years of age at recruitment; sampled from nine United Kingdom general practices between 1989 and 1994                                                                                                                                                                                                       |
| <b>Exclusions:</b>                  | History of unstable angina or acute myocardial infarction; a major Q wave on the ECG; regular antiplatelet or anticoagulant therapy; cerebrovascular disease; life-threatening malignancy.                                                                                                                                                                      |
| <b>BP measures:</b>                 | Recorded with a random-zero sphygmomanometer (average of 2 measurements) at study baseline.                                                                                                                                                                                                                                                                     |
| <b>References:</b>                  | Cooper <i>et al.</i> (2000)                                                                                                                                                                                                                                                                                                                                     |
| <b>Whole blood and tissue panel</b> |                                                                                                                                                                                                                                                                                                                                                                 |
| <b>Samples:</b>                     | Combination of $N = 1469$ peripheral whole blood samples, and tissue panel from $N = 85$ individuals with subcutaneous and visceral adipose tissue, liver tissue and muscle tissue; all samples from unrelated individuals of European ancestry.                                                                                                                |
| <b>RNA measurement:</b>             | Complementary RNA hybridized to Illumina HumanRef-8 v2 arrays ( $N = 229$ peripheral blood samples) or to Illumina HumanHT-12 arrays ( $N = 1,240$ peripheral blood samples, $N = 83$ subcutaneous adipose samples, $N = 77$ visceral adipose samples, $N = 74$ liver samples, $N = 62$ muscle samples), and scanned on the Illumina BeadArray Reader.          |
| <b>Normalisation:</b>               | Raw probe intensities extracted using Illumina BeadStudio Gene Expression module v3.2 (no background correction applied, no probes with low expression removed); HumanRef-8 and HumanHT-12 datasets quantile normalized separately to the median distribution; expression values $\log_2$ transformed then affinely scaled to have zero mean and unit variance. |
| <b>Batch effects:</b>               | HumanRef-8 and HumanHT-12 datasets separately analysed using PCA; residual expression levels calculated by regressing onto 50 PCs that strongly affect gene expression levels but reflect among others technical (batch) effects; for each individual in the tissue panel, residuals then averaged over tissues.                                                |

---

| Study                        | Details                                                                                                                                                                                                                                                                                                           |
|------------------------------|-------------------------------------------------------------------------------------------------------------------------------------------------------------------------------------------------------------------------------------------------------------------------------------------------------------------|
| <b>Monocytes</b>             |                                                                                                                                                                                                                                                                                                                   |
| <b>Samples:</b>              | Monocytes from $N = 758$ individuals, comprising $N = 395$ healthy blood donors (recruited from one Centre) and $N = 363$ patients with premature myocardial infarction (recruited from 4 centres), assembled by the Cardiogenics consortium; all subjects of white European descent.                             |
| <b>RNA measurement:</b>      | RNA extracted from monocytes isolated from whole blood with CD14 micro beads (AutoMacs Pro, Miltenyi); mRNA amplified and labelled using Illumina Total Prep RNA Amplification Kit (Ambion, Inc., Austin, TX); hybridized to Illumina HumanRef-8 arrays, and scanned using the Illumina BeadArray Reader.         |
| <b>Normalisation:</b>        | Probe intensities extracted using the Illumina Bead Studio Gene Expression module. Variance Stabilization Transformation (VST) was applied to the raw intensities and quantile normalization was performed in the R statistical environment (R Development Core Team 2004) using the Lumi and Beadarray packages. |
| <b>Level quantification:</b> | Transcripts were categorised according to whether expression was within the top 20%, the bottom 20% or between 20-80% of genes expressed to give an indication of the relative level of expression (high, low or medium, respectively) for that gene in monocytes.                                                |

Table S3: Genotyping, quality control and association analyses.

| Study                                                                | Details                                                                                                                                                                                                                                                                                                                                                                                                                                                      |
|----------------------------------------------------------------------|--------------------------------------------------------------------------------------------------------------------------------------------------------------------------------------------------------------------------------------------------------------------------------------------------------------------------------------------------------------------------------------------------------------------------------------------------------------|
| <b>AIBIII, ASCOT, BRIGHT cases and controls, MDC, NBS and NORDIL</b> |                                                                                                                                                                                                                                                                                                                                                                                                                                                              |
| <b>Genotyping:</b>                                                   | Illumina HumanCVD BeadChip (Illumina, San Diego, CA) following manufacturer's protocol.                                                                                                                                                                                                                                                                                                                                                                      |
| <b>Genotype calling:</b>                                             | Intensity data normalised using Illumina BeadStudio; genotypes called using Illuminus (Teo <i>et al.</i> 2007) in two batches, corresponding to UK/Irish ancestry (AIBIII, ASCOT, BRIGHT and NBS) and to Nordic ancestry (MDC and NORDIL), for a total of $N = 12420$ samples.                                                                                                                                                                               |
| <b>Sample call rate:</b>                                             | Excluded samples on whole/half plates with low call rate ( $N = 204$ ); excluded samples with genotyping rate $< 0.98$ (taken over SNPs with good clustering, defined as Illuminus perturbation score $> 0.9$ ; $N = 116$ ).                                                                                                                                                                                                                                 |
| <b>Sample duplicates:</b>                                            | Merged genotypes for deliberate duplicate pairs ( $N = 17$ ); excluded samples with inconsistent data across duplicates ( $N = 2$ ); excluded accidental duplicates ( $N = 144$ ).                                                                                                                                                                                                                                                                           |
| <b>Sample relatedness:</b>                                           | Excluded lower-call-rate samples from first degree relative pairs ( $N = 87$ ).                                                                                                                                                                                                                                                                                                                                                                              |
| <b>Sample ancestry:</b>                                              | Ancestry PCA (Price <i>et al.</i> 2006) in two batches corresponding to UK/Irish ancestry and to Nordic ancestry, using an LD-pruned set of $\sim 14,000$ SNPs; excluded outliers (defined as $> 6$ standard deviations from the mean in any of the first 10 dimensions) over 5 iterated rounds of ancestry PCA ( $N = 220$ ).                                                                                                                               |
| <b>Sample sex checks:</b>                                            | Excluded samples with X chromosome heterozygosity inconsistent with phenotypic sex ( $N = 153$ ).                                                                                                                                                                                                                                                                                                                                                            |
| <b>SNP exclusions:</b>                                               | Separately for UK/Irish ancestry and for Nordic ancestry samples: Excluded SNPs with call rate $< 0.9975$ ; excluded SNPs with Hardy-Weinberg $P < 10^{-6}$ in either cases alone, controls alone, or cases and controls combined; excluded SNPs with differential missingness between cases and controls at $P < 10^{-6}$ ; excluded SNPs with MAF $< 0.01$ for dichotomous hypertension analyses.                                                          |
| <b>Association analyses:</b>                                         | Normal linear model and logistic regression using PLINK (Purcell <i>et al.</i> 2007); analysed as 3 groups (ASCOT vs. AIBIII+NBS, BRIGHT cases vs. controls, NORDIL vs. MDC) for dichotomous hypertension; analysed as 2 groups (AIBIII+ASCOT+BRIGHT, MDC+NORDIL) for continuous trait analyses to maintain approximate balance between high and low BP individuals because no BP phenotype data for NBS; first 10 PCs from ancestry PCA used as covariates. |
| <b>BWHHS</b>                                                         |                                                                                                                                                                                                                                                                                                                                                                                                                                                              |
| <b>Genotyping:</b>                                                   | Illumina HumanCVD BeadChip following manufacturer's protocol (Illumina, San Diego, CA).                                                                                                                                                                                                                                                                                                                                                                      |
| <b>Genotype calling:</b>                                             | Intensity data normalised and genotypes called using Illumina BeadStudio (v3) Genotyping Module.                                                                                                                                                                                                                                                                                                                                                             |
| <b>Sample ancestry:</b>                                              | Ancestry PCA Price <i>et al.</i> (2006) confirmed self-reported ethnicity; excluded individuals on the basis of non-European ancestry ( $N = 32$ ).                                                                                                                                                                                                                                                                                                          |
| <b>SNP exclusions:</b>                                               | Excluded SNPs with call rate $< 0.98$ ; excluded SNPs with Hardy-Weinberg $P < 10^{-6}$ in combined sample. excluded SNPs with MAF $< 0.01$ for dichotomous hypertension analyses.                                                                                                                                                                                                                                                                           |
| <b>Association analyses:</b>                                         | Normal linear model and logistic regression using PLINK (Purcell <i>et al.</i> 2007); age, age <sup>2</sup> and BMI used as covariates.                                                                                                                                                                                                                                                                                                                      |
| <b>GRAPHIC</b>                                                       |                                                                                                                                                                                                                                                                                                                                                                                                                                                              |
| <b>Genotyping:</b>                                                   | Illumina HumanCVD BeadChip following manufacturer's protocol (Illumina, San Diego, CA).                                                                                                                                                                                                                                                                                                                                                                      |
| <b>Genotype calling:</b>                                             | Intensity data normalised and genotypes called using Illumina BeadStudio (v3) Genotyping Module.                                                                                                                                                                                                                                                                                                                                                             |

| Study                                     | Details                                                                                                                                                                                                                                                                                                              |
|-------------------------------------------|----------------------------------------------------------------------------------------------------------------------------------------------------------------------------------------------------------------------------------------------------------------------------------------------------------------------|
| <b>Sample call rate:</b>                  | Excluded individuals with $< 0.90$ overall genotyping call rate ( $N = 13$ ).                                                                                                                                                                                                                                        |
| <b>SNP exclusions:</b>                    | Excluded SNPs with call rate $< 0.98$ ; excluded SNPs with Hardy-Weinberg $P < 10^{-6}$ in combined sample. excluded SNPs with MAF $< 0.01$ for all analyses.                                                                                                                                                        |
| <b>Association analyses:</b>              | Normal linear regression and logistic regression, fitted using generalized estimating equations with exchangeable correlation structure to account for familial correlations; sex, age, age <sup>2</sup> and BMI used as covariates.                                                                                 |
| <b>PROCARDIS</b>                          |                                                                                                                                                                                                                                                                                                                      |
| <b>Genotyping:</b>                        | Illumina HumanCVD BeadChip following manufacturer's protocol (Illumina, San Diego, CA).                                                                                                                                                                                                                              |
| <b>Genotype calling:</b>                  | Intensity data normalised and genotypes called using Illumina BeadStudio (v3) Genotyping Module.                                                                                                                                                                                                                     |
| <b>Sample call rate:</b>                  | Excluded individuals with $< 0.95$ call rate ( $N = 2$ ).                                                                                                                                                                                                                                                            |
| <b>Sample duplicates:</b>                 | Excluded duplicate samples ( $N = 6$ ).                                                                                                                                                                                                                                                                              |
| <b>Sample relatedness:</b>                | Identity-by-state (IBS) analysis identified cryptically closely-related individuals as well as providing information to confirm or revise self-reported full/half-sib relationships between some (21%) individuals.                                                                                                  |
| <b>Sample sex checks:</b>                 | Sex codes revised to genotype sex for 20 individuals. Males with heterozygous X-chromosome genotypes were excluded (on a marker by marker basis).                                                                                                                                                                    |
| <b>SNP exclusions:</b>                    | Excluded SNPs with call rate $< 0.98$ ; excluded SNPs with Hardy-Weinberg $P < 10^{-6}$ in combined sample. excluded SNPs with MAF $< 0.01$ for all analyses.                                                                                                                                                        |
| <b>Association analyses:</b>              | Normal linear model and logistic regression, with robust sandwich estimators of variance (Williams 2000) to allow for familial clustering (full and half-siblings), calculated using Stata (version 10.1); country-of-origin used as a categorical covariate; sex, age, age <sup>2</sup> and BMI used as covariates. |
| <b>WHII</b>                               |                                                                                                                                                                                                                                                                                                                      |
| <b>Genotyping:</b>                        | DNA was stored from over 6,000 participants that provided a blood sample at phase 7; Illumina HumanCVD BeadChip following manufacturer's protocol (Illumina, San Diego, CA).                                                                                                                                         |
| <b>Genotype calling:</b>                  | Intensity data normalised and genotypes called using Illumina BeadStudio (v3) Genotyping Module.                                                                                                                                                                                                                     |
| <b>Sample call rate:</b>                  | Excluded samples with call rate $< 0.80$ .                                                                                                                                                                                                                                                                           |
| <b>Sample ancestry:</b>                   | Excluded outliers in a multidimensional scaling analysis based on the genome-wide identity-by-state, as implemented in PLINK (Purcell <i>et al.</i> 2007).                                                                                                                                                           |
| <b>SNP exclusions:</b>                    | Excluded SNPs with call rate $< 0.98$ ; excluded SNPs with Hardy-Weinberg $P < 10^{-6}$ in combined sample. excluded SNPs with MAF $< 0.01$ for dichotomous hypertension analyses.                                                                                                                                   |
| <b>Association analyses:</b>              | Normal linear model and logistic regression using PLINK (Purcell <i>et al.</i> 2007); sex, age, age <sup>2</sup> and BMI used as covariates.                                                                                                                                                                         |
| <b>BRHS, ELSA, INTERGENE and MRC NSHD</b> |                                                                                                                                                                                                                                                                                                                      |
| <b>Genotyping:</b>                        | KASPAR assay at KBiosciences.                                                                                                                                                                                                                                                                                        |
| <b>Genotype calling:</b>                  | By KBiosciences.                                                                                                                                                                                                                                                                                                     |
| <b>SNP exclusions:</b>                    | Excluded SNPs with call rate $< 0.95$ ; excluded SNPs with Hardy-Weinberg $P < 0.005$ .                                                                                                                                                                                                                              |
| <b>Association analyses:</b>              | Analysed by cohort; normal linear regression and logistic regression using PLINK (Purcell <i>et al.</i> 2007) and R (R Development Core Team 2004); sex, age, age <sup>2</sup> and BMI used as covariates when not invariant.                                                                                        |
| <b>EAS, HYPEST and NPHSII</b>             |                                                                                                                                                                                                                                                                                                                      |
| <b>Genotyping:</b>                        | KASPAR assay at Bart's and the London Genome Center.                                                                                                                                                                                                                                                                 |

| Study                                | Details                                                                                                                                                                                                                                                                                                                                                                                                                                                                      |
|--------------------------------------|------------------------------------------------------------------------------------------------------------------------------------------------------------------------------------------------------------------------------------------------------------------------------------------------------------------------------------------------------------------------------------------------------------------------------------------------------------------------------|
| <b>Genotype calling:</b>             | Image processing and genotype calling using SDS (Applied Biosystems); genotype calling using Autocaller (Applied Biosystems); genotypes discrepant between the two calling algorithms manually inspected and corrected.                                                                                                                                                                                                                                                      |
| <b>SNP exclusions:</b>               | Excluded SNPs with call rate < 0.95; excluded SNPs with Hardy-Weinberg $P < 0.005$ .                                                                                                                                                                                                                                                                                                                                                                                         |
| <b>Association analyses:</b>         | Analysed by cohort; normal linear regression and logistic regression; sex, age, age <sup>2</sup> and BMI used as covariates for population cohorts (EAS and NPHSII).                                                                                                                                                                                                                                                                                                         |
| <b>HYPERGENES cases and controls</b> |                                                                                                                                                                                                                                                                                                                                                                                                                                                                              |
| <b>Genotyping:</b>                   | Human 1M-duo BeadChip (Illumina Inc, San Diego, CA, USA).                                                                                                                                                                                                                                                                                                                                                                                                                    |
| <b>Sample call rate:</b>             | Excluded if call rate $\leq 0.95$ .                                                                                                                                                                                                                                                                                                                                                                                                                                          |
| <b>Sample ancestry:</b>              | 25 outliers excluded in ancestry PCA (Price <i>et al.</i> 2006).                                                                                                                                                                                                                                                                                                                                                                                                             |
| <b>SNP exclusions:</b>               | Excluded if call rate < 0.99 or Hardy-Weinberg $P < 10^{-8}$ or MAF < 0.01.                                                                                                                                                                                                                                                                                                                                                                                                  |
| <b>SNP imputation:</b>               | Not needed because the Human 1M-duo BeadChip includes all SNPs on the HumanCVD BeadChip.                                                                                                                                                                                                                                                                                                                                                                                     |
| <b>Association analyses:</b>         | Normal linear regression and logistic regression; first 10 PCs from ancestry PCA used as covariates.                                                                                                                                                                                                                                                                                                                                                                         |
| <b>OHGS cases and controls</b>       |                                                                                                                                                                                                                                                                                                                                                                                                                                                                              |
| <b>Genotyping:</b>                   | Genechip® Human Mapping 500K Array set (Affymetrix, Santa Clara, CA); Genome-Wide Human SNP Array 6.0 (Affymetrix, Santa Clara, CA)                                                                                                                                                                                                                                                                                                                                          |
| <b>Genotype calling:</b>             | Dynamic module algorithm and BRLMM algorithm for 500K Array set; Birdseed algorithm for 6.0 Array.                                                                                                                                                                                                                                                                                                                                                                           |
| <b>Sample call rate:</b>             | All samples > 0.93 for dynamic module algorithm, > 0.98 for BRLMM algorithm; mean call rate 0.993 for Birdseed algorithm.                                                                                                                                                                                                                                                                                                                                                    |
| <b>Sample ancestry:</b>              | Outliers excluded in ancestry PCA (Price <i>et al.</i> 2006).                                                                                                                                                                                                                                                                                                                                                                                                                |
| <b>SNP exclusions:</b>               | Only 482,251 SNPs common between 500K Array set and 6.0 Arrays were used; SNPs excluded if call rate < 0.95; or if Hardy-Weinberg $P < 10^{-4}$ ; or if MAF < 0.01.                                                                                                                                                                                                                                                                                                          |
| <b>SNP imputation:</b>               | Using IMPUTE (version 0.5.0; Marchini <i>et al.</i> 2007) and a HapMap CEU reference panel International HapMap Consortium (2007).                                                                                                                                                                                                                                                                                                                                           |
| <b>Association analyses:</b>         | Normal linear model and logistic regression, using the “-proper” option in SNPTEST to account for uncertainty in imputed genotypes (Marchini <i>et al.</i> 2007); first 10 PCs from ancestry PCA used as covariates.                                                                                                                                                                                                                                                         |
| <b>GBPG</b>                          |                                                                                                                                                                                                                                                                                                                                                                                                                                                                              |
| <b>Genotyping etc.:</b>              | Genotyping, QC, and SNP imputation have all been described previously (Newton-Cheh <i>et al.</i> 2009).                                                                                                                                                                                                                                                                                                                                                                      |
| <b>Association analyses:</b>         | Normal linear regression and logistic regression by individual cohorts (Newton-Cheh <i>et al.</i> 2009). To avoid double counting of samples, we re-ran the GBPG meta-analyses, excluding results from $N = 795$ individuals from the PROCARDIS study that had been genotyped on the Illumina Human1M-Duo BeadChip, and that partly overlap with the $N = 3,198$ individuals from the PROCARDIS study genotyped on the HumanCVD BeadChip and used in our discovery analysis. |
| <b>Whole blood and tissue panel</b>  |                                                                                                                                                                                                                                                                                                                                                                                                                                                                              |
| <b>SNP Genotyping:</b>               | Using HumanHap300, HumanHap370, Human 610-Quad, and Omni1-Quad BeadChips (Illumina, San Diego, USA), according to standard protocols from Illumina.                                                                                                                                                                                                                                                                                                                          |
| <b>SNP exclusions:</b>               | Analysis confined to 294,757 SNPs that are genotyped by all the genotyping arrays used; excluded SNPs with call rate < 0.95, Hardy-Weinberg $P < 0.001$ , or MAF < 0.05.                                                                                                                                                                                                                                                                                                     |
| <b>SNP imputation:</b>               | Using IMPUTE (v2.0; Marchini <i>et al.</i> 2007) and phased haplotypes from the HapMap II release 22 CEU reference panel (International HapMap Consortium 2007).                                                                                                                                                                                                                                                                                                             |

| Study                        | Details                                                                                                                                                                                                                                                                                                                                       |
|------------------------------|-----------------------------------------------------------------------------------------------------------------------------------------------------------------------------------------------------------------------------------------------------------------------------------------------------------------------------------------------|
| <b>Association analysis:</b> | Meta-analysis of all samples (final sample size $N = 1,554$ ) performed for association with each transcript in turn, using normal linear regression models and testing all SNPs within a window extending 500kb either side of the probe centre.                                                                                             |
| <b>Multiple testing:</b>     | False discovery rate (FDR) controlled at 5%, by permuting the data 100 times using the average of the expression of the four tissues in the panel (Tusher <i>et al.</i> 2001), giving significance threshold $P < 10^{-3}$ for <i>cis</i> -acting eSNPs.                                                                                      |
| <b>Trans-analysis:</b>       | For the SOX6 index SNP we searched for <i>trans</i> -acting effects using an identical analysis except that all probes were tested for association, and applied FDR control separately for this analysis because of the larger multiple testing burden.                                                                                       |
| <b>Monocytes</b>             |                                                                                                                                                                                                                                                                                                                                               |
| <b>SNP genotyping:</b>       | Genomic DNA was extracted from peripheral blood by standard procedures. Whole-genome genotyping was carried out using either the Human Custom 1.2M or the Human Quad Custom 670 arrays from Illumina.                                                                                                                                         |
| <b>Proxy SNPs:</b>           | Where the index SNP was not directly genotyped, proxy SNPs (with $r^2 > 0.9$ ) were used where available: rs1801131 ( $r^2 = 0.93$ with rs4846048 at MTHFR-NPPB); rs129128 ( $r^2 = 1$ with rs1799945 at HFE); rs2681472 ( $r^2 = 1$ with rs11105354 at ATP2B1); no good proxy was available for rs3918226 at NOS3 or rs661348 at LSP1/TNNT3. |
| <b>Association analyses:</b> | <i>cis</i> -associations tested for all transcripts within 1 Mb of each index SNP; association tested using additive regression models adjusted for age, gender and centre status using Stata (version 11).                                                                                                                                   |
| <b>Multiple testing:</b>     | Raw (unadjusted) association $P$ -values for all transcripts were reported; in the text we refer only to associations with $P \leq 10^{-4}$ .                                                                                                                                                                                                 |

Table S4: Estimates of non-ascertained phenotypic SDs for ascertained studies.

| Study                      | Phenotypic SD                            | — Phenotype — |       |       |       |
|----------------------------|------------------------------------------|---------------|-------|-------|-------|
|                            |                                          | DBP           | MAP   | PP    | SBP   |
| <b>AIBIII+ASCOT+BRIGHT</b> |                                          |               |       |       |       |
|                            | Ascertained (observed data)              | 16.09         | 19.77 | 17.50 | 29.32 |
|                            | Nonascertained (estimated <sup>a</sup> ) | 12.02         | 13.86 | 12.31 | 19.71 |
|                            | Ratio <sup>b</sup>                       | 1.34          | 1.43  | 1.42  | 1.49  |
| <b>MDC+NORDIL</b>          |                                          |               |       |       |       |
|                            | Ascertained (observed data)              | 16.99         | 21.87 | 18.13 | 32.80 |
|                            | Nonascertained (estimated <sup>a</sup> ) | 11.79         | 13.32 | 11.28 | 18.41 |
|                            | Ratio <sup>b</sup>                       | 1.44          | 1.64  | 1.61  | 1.78  |
| <b>HYPERGENES</b>          |                                          |               |       |       |       |
|                            | Ascertained (observed data)              | 12.86         | 14.27 | 10.54 | 18.82 |
|                            | Nonascertained (estimated <sup>a</sup> ) | 12.81         | 14.46 | 12.75 | 20.18 |
|                            | Ratio <sup>b,c</sup>                     | 1.00          | 0.99  | 0.83  | 0.93  |
| <b>OHGS</b>                |                                          |               |       |       |       |
|                            | Ascertained (observed data)              | 11.35         |       |       | 17.12 |
|                            | Nonascertained (estimated <sup>a</sup> ) | 11.94         |       |       | 19.72 |
|                            | Ratio <sup>b,c</sup>                     | 0.95          |       |       | 0.87  |

Notes: **a.** For each ascertained study, the SD of the corresponding population or non-ascertained BP trait distribution was estimated, using the following linear regression models that were estimated in a non-ascertained cohort (WHII):

$$\begin{aligned}
 \text{DBP} &= \text{const} - 2.36 \times \text{SEX} + 1.03 \times \text{AGE} - 0.00678 \times \text{AGE}^2 + 0.933 \times \text{BMI} + E \\
 \text{MAP} &= \text{const} - 2.60 \times \text{SEX} + 0.682 \times \text{AGE} - 0.00212 \times \text{AGE}^2 + 1.01 \times \text{BMI} + E \\
 \text{PP} &= \text{const} - 0.746 \times \text{SEX} - 1.05 \times \text{AGE} + 0.0140 \times \text{AGE}^2 + 0.220 \times \text{BMI} + E \\
 \text{SBP} &= \text{const} - 3.10 \times \text{SEX} - 0.019 \times \text{AGE} + 0.00721 \times \text{AGE}^2 + 1.153 \times \text{BMI} + E
 \end{aligned}$$

We assume the population phenotypic variance can be decomposed into a component for the specific demographic composition of each ascertained study (calculated using coefficients estimated in a non-ascertained sample; for SEX coded 1 for males and 2 for females; AGE in years; and BMI in kg/m<sup>2</sup>), and a further independent component (again estimated in a non-ascertained sample; with SD( $E$ ) = 10.9mmHg for DBP; 12.3mmHg for MAP; 10.8mmHg for PP; and 17.2mmHg for SBP). **b.** As illustrated in Figure S6, we estimated each inflation correction factor  $r_i$  as the ratio of phenotypic variances, i.e. the square of the ratio of phenotypic SDs. For non-ascertained studies  $r_i = 1$ . If  $\hat{\beta}_i$  and  $s_i$  are the effect size estimate and standard error for the  $i$ -th study, standard inverse variance weighted (IVW) meta-analysis gives

$$\hat{\beta}_{\text{IVW}} = \frac{\sum_i \hat{\beta}_i s_i^{-2}}{\sum_i s_i^{-2}} \quad \text{with} \quad s_{\text{IVW}} = \sqrt{1 / \sum_i s_i^{-2}}$$

Our alternatively weighted (AW) meta-analysis replaces  $\hat{\beta}_i$  by  $\hat{\beta}_i / r_i$ , and therefore replaces  $s_i$  by  $s_i / r_i$ , and thus gives

$$\hat{\beta}_{\text{AW}} = \frac{\sum_i r_i \hat{\beta}_i s_i^{-2}}{\sum_i r_i^2 s_i^{-2}} \quad \text{with} \quad s_{\text{AW}} = \sqrt{1 / \sum_i r_i^2 s_i^{-2}}$$

Note that our alternative weighting does not affect the false positive rate (because a well calibrated standard error can be calculated for any linear combination of the  $\hat{\beta}_i$ , assuming well calibrated  $s_i$  and independence of the  $\hat{\beta}_i$ ), and that it maximises power when all studies (ascertained and non-ascertained) are unbiasedly estimating equivalent population parameters after rescaling. **c.** Because we have estimated the ratio of phenotypic SDs using a demographic model with coefficients estimated in a convenience population, and not from the actual populations from which the ascertained samples were drawn, the estimated ratio can be less than one due to imprecision or bias. In these cases we used no inflation correction i.e. we used  $r_i = 1$ .



Table S5: Inter-trait test statistic correlation matrix.

| — Spearman correlation — <sup>a</sup> |     |                   |                   |                   |                   |
|---------------------------------------|-----|-------------------|-------------------|-------------------|-------------------|
|                                       | DBP | SBP               | MAP               | PP                | HTN               |
| DBP                                   | 1   | 0.83 <sup>b</sup> | 0.96 <sup>c</sup> | 0.45              | 0.67 <sup>d</sup> |
| SBP                                   |     | 1                 | 0.95 <sup>c</sup> | 0.86 <sup>c</sup> | 0.70 <sup>d</sup> |
| MAP                                   |     |                   | 1                 | 0.66              | 0.72 <sup>d</sup> |
| PP                                    |     |                   |                   | 1                 | 0.53 <sup>d</sup> |
| HTN                                   |     |                   |                   |                   | 1                 |

  

| — Eigenvalues — |      |      |      |       |                     |
|-----------------|------|------|------|-------|---------------------|
|                 | 3.96 | 0.64 | 0.39 | 0.015 | 0.0012 <sup>e</sup> |

  

| — Effective number of tests — |                         |
|-------------------------------|-------------------------|
| $M_{\text{eff}}$              | $= 2.7577$ <sup>f</sup> |

Notes: **a.** We calculated the Spearman correlation ( $\rho$ ) between meta-analysis association statistics (for our full discovery dataset) for each pairwise combination of phenotypes, over all SNPs analysed. For clarity only the upper triangle of the correlation matrix is shown. The Spearman correlation is relatively robust to “outliers” caused by true positive associations, and when association statistics for most SNPs follow the multivariate normal null distribution, it provides a robust estimate of the Pearson correlation ( $r$ ) between null test statistics. Extremely similar results were observed when we calculated the correlations only over SNPs with meta-analysis sample sizes  $> 50\%$  of the maximum sample size (not shown). **b.** The correlation between DBP and SBP is higher than the phenotypic correlation typically observed in general population samples, because of the inclusion of samples ascertained from the extremes of the BP distribution in our analysis. **c.** As expected, there is a strong correlation between MAP and both DBP and SBP, and between PP and SBP. Thus, testing these four continuous BP phenotypes in parallel will have at best a minor power advantage over simply testing DBP and SBP as in most previous studies, and would potentially incur a power disadvantage unless the inter-phenotype correlations are taken into account when correcting for multiple testing. **d.** The weaker correlation with dichotomous hypertension (HTN) arises in part because of the additional cohort (NBS) used in that analysis, and hence in our study the correlation is lower than would be observed if a common set of individuals were used for all analyses. **e.** The near rank deficiency of the  $5 \times 5$  correlation matrix is expected because the PP and MAP phenotype vectors are linear combinations of the DBP and SBP phenotype vectors, and hence normal linear model association test statistics for PP and MAP are linear combinations of the association test statistics for DBP and SBP, and so the  $5 \times 5$  Pearson correlation matrix for association test statistics computed for a single study with unrelated individuals has rank 3. **f.** The generally high inter-trait correlations imply that the effective number of tests is  $M_{\text{eff}} = 2.7577$  when all 5 traits are tested in parallel, using the estimate of Nyholt (2004). For small correlation matrices, we prefer the method of Nyholt (2004) because it gives an effective number of tests that is an analytically continuous function of the Eigenvalues of the correlation matrix, whereas the method of Li and Ji (2005) is extremely sensitive to any individual Eigenvalue changing from slightly-above to slightly-below any integer value.

Table S6: Effective number of tests by chromosome.

| Chromosome | — BRIGHT — <sup>a</sup> |                                   |                        | — NORDIL+MDC — <sup>b</sup> |                                   |                        |
|------------|-------------------------|-----------------------------------|------------------------|-----------------------------|-----------------------------------|------------------------|
|            | #SNPs <sup>c</sup>      | — $M_{\text{eff}}$ — <sup>d</sup> |                        | #SNPs <sup>c</sup>          | — $M_{\text{eff}}$ — <sup>d</sup> |                        |
|            |                         | Nyholt                            | Li and Ji <sup>e</sup> |                             | Nyholt                            | Li and Ji <sup>e</sup> |
| 1          | 5078                    | 5072.75                           | 2284.34                | 5002                        | 4996.78                           | 2259.20                |
| 2          | 2821                    | 2816.96                           | 1476.75                | 2812                        | 2807.83                           | 1448.33                |
| 3          | 2062                    | 2058.49                           | 1135.90                | 2037                        | 2033.48                           | 1120.43                |
| 4          | 1939                    | 1934.34                           | 1027.98                | 1894                        | 1889.27                           | 996.64                 |
| 5          | 2030                    | 2025.75                           | 1076.77                | 2035                        | 2030.58                           | 1067.17                |
| 6          | 2538                    | 2531.06                           | 1212.77                | 2549                        | 2541.86                           | 1210.64                |
| 7          | 2003                    | 1998.71                           | 1064.69                | 2010                        | 2005.65                           | 1066.37                |
| 8          | 2126                    | 2118.93                           | 990.93                 | 2108                        | 2100.75                           | 980.14                 |
| 9          | 1576                    | 1571.88                           | 874.47                 | 1574                        | 1569.8                            | 871.38                 |
| 10         | 2084                    | 2079.16                           | 1061.63                | 2064                        | 2059.11                           | 1046.21                |
| 11         | 2760                    | 2755.97                           | 1394.61                | 2717                        | 2712.97                           | 1374.25                |
| 12         | 2520                    | 2515.44                           | 1288.66                | 2518                        | 2513.25                           | 1259.52                |
| 13         | 909                     | 905.99                            | 540.88                 | 899                         | 895.91                            | 532.26                 |
| 14         | 853                     | 849.87                            | 523.89                 | 850                         | 846.75                            | 512.08                 |
| 15         | 1383                    | 1378.25                           | 712.53                 | 1381                        | 1376.1                            | 697.21                 |
| 16         | 1461                    | 1456.8                            | 768.54                 | 1451                        | 1446.67                           | 756.90                 |
| 17         | 1839                    | 1835.6                            | 1026.95                | 1825                        | 1821.61                           | 1009.50                |
| 18         | 570                     | 567.46                            | 365.40                 | 566                         | 563.36                            | 358.67                 |
| 19         | 1633                    | 1630.05                           | 960.81                 | 1603                        | 1600.08                           | 951.42                 |
| 20         | 990                     | 987.49                            | 611.05                 | 965                         | 962.51                            | 598.38                 |
| 21         | 639                     | 632.89                            | 326.28                 | 632                         | 625.62                            | 316.55                 |
| 22         | 752                     | 749.22                            | 454.58                 | 735                         | 732.12                            | 435.11                 |
| Totals     | 40566                   | 40473.06                          | 21180.41               | 40227                       | 40132.04                          | 20868.36               |

Notes: **a.** Genotype data from the  $N=3,657$  BRIGHT cases and controls, which we assumed was representative of allele frequencies and LD patterns in European ancestry samples in general. **b.** Genotype data from the  $N = 3,771$  NORDIL/MDC cases and controls, which gives very similar results to the BRIGHT data. **c.** Number of polymorphic SNPs. **d.** We found that it was computationally efficient to compute the Eigenvalues of the genotype correlation matrix for each chromosome directly from the singular value decomposition (SVD) of the normalised genotype matrix, thus avoiding the steps of explicitly calculating or decomposing the correlation matrix. **e.** For large correlation matrices, the method of Li and Ji (2005) has been shown in simulation tests to estimate the effective number of tests more accurately and less conservatively than the method of Nyholt (2004). The sensitivity mentioned in Table S5 note f. is less important because it averages out over the very large number of Eigenvalues.

Table S7: Discovery results for top 10 SNPs and 5 BP phenotypes.

| Locus<br>and SNP <sup>a</sup> | Phenotype        | Alleles<br>coded/<br>noncoded | <i>N</i> | — Discovery analysis — |                           |                        |                       |
|-------------------------------|------------------|-------------------------------|----------|------------------------|---------------------------|------------------------|-----------------------|
|                               |                  |                               |          | Coded<br>freq.         | $\beta_{\text{SNP}}$ (SE) | <i>P</i> value         |                       |
| NOS3                          | DBP <sup>b</sup> | T/C                           | 22693    | 0.08                   | 0.8263(0.1766)            | $2.87 \times 10^{-6}$  |                       |
|                               | SBP              | T/C                           | 22693    | 0.08                   | 0.7151(0.2570)            | $5.40 \times 10^{-3}$  |                       |
|                               | MAP              | T/C                           | 22693    | 0.08                   | 0.7470(0.1920)            | $1.00 \times 10^{-4}$  |                       |
|                               | rs3918226        | PP                            | T/C      | 22693                  | 0.08                      | 0.0572(0.1701)         | $7.37 \times 10^{-1}$ |
|                               | HTN              | T/C                           | 25050    | 0.08                   | 0.1325(0.0367)            | $3.01 \times 10^{-4}$  |                       |
| LSP1/TNNT3                    | DBP              | T/C                           | 22684    | 0.57                   | -0.5743(0.0962)           | $2.36 \times 10^{-9}$  |                       |
|                               | SBP              | T/C                           | 22684    | 0.57                   | -0.8414(0.1425)           | $3.57 \times 10^{-9}$  |                       |
|                               | MAP <sup>b</sup> | T/C                           | 22684    | 0.57                   | -0.6502(0.1055)           | $7.00 \times 10^{-10}$ |                       |
|                               | rs661348         | PP                            | T/C      | 22684                  | 0.57                      | -0.3992(0.0945)        | $2.42 \times 10^{-5}$ |
|                               | HTN              | T/C                           | 25042    | 0.57                   | -0.1183(0.0203)           | $5.78 \times 10^{-9}$  |                       |
| SOX6                          | DBP              | T/C                           | 22690    | 0.21                   | 0.4979(0.1184)            | $2.59 \times 10^{-5}$  |                       |
|                               | SBP              | T/C                           | 22690    | 0.21                   | 0.7771(0.1762)            | $1.03 \times 10^{-5}$  |                       |
|                               | MAP <sup>b</sup> | T/C                           | 22690    | 0.21                   | 0.5763(0.1301)            | $9.38 \times 10^{-6}$  |                       |
|                               | rs2014408        | PP                            | T/C      | 22690                  | 0.21                      | 0.3983(0.1168)         | $6.46 \times 10^{-4}$ |
|                               | HTN              | T/C                           | 25048    | 0.21                   | 0.0821(0.0248)            | $9.13 \times 10^{-4}$  |                       |
| NUCB2-ABCC8                   | DBP              | G/A                           | 22659    | 0.58                   | -0.2282(0.0970)           | $1.86 \times 10^{-2}$  |                       |
|                               | SBP              | G/A                           | 22659    | 0.58                   | -0.5982(0.1435)           | $3.05 \times 10^{-5}$  |                       |
|                               | MAP              | G/A                           | 22659    | 0.58                   | -0.3497(0.1062)           | $9.94 \times 10^{-4}$  |                       |
|                               | rs2074311        | PP <sup>b</sup>               | G/A      | 22659                  | 0.58                      | -0.4468(0.0951)        | $2.62 \times 10^{-6}$ |
|                               | HTN              | G/A                           | 25017    | 0.58                   | -0.0488(0.0203)           | $1.64 \times 10^{-2}$  |                       |
| CACNA1C                       | DBP <sup>b</sup> | T/C                           | 22662    | 0.61                   | 0.4703(0.0985)            | $1.80 \times 10^{-6}$  |                       |
|                               | SBP              | T/C                           | 22662    | 0.61                   | 0.5889(0.1453)            | $5.07 \times 10^{-5}$  |                       |
|                               | MAP              | T/C                           | 22662    | 0.61                   | 0.4925(0.1077)            | $4.85 \times 10^{-6}$  |                       |
|                               | rs3819526        | PP                            | T/C      | 22662                  | 0.61                      | 0.2511(0.0963)         | $9.12 \times 10^{-3}$ |
|                               | HTN              | T/C                           | 25020    | 0.61                   | 0.0765(0.0208)            | $2.31 \times 10^{-4}$  |                       |
| MTHFR-NPPB                    | DBP <sup>b</sup> | T/G                           | 22659    | 0.33                   | -0.5536(0.1025)           | $6.73 \times 10^{-8}$  |                       |
|                               | SBP              | T/G                           | 22659    | 0.33                   | -0.6930(0.1517)           | $4.91 \times 10^{-6}$  |                       |
|                               | MAP              | T/G                           | 22659    | 0.33                   | -0.5803(0.1123)           | $2.39 \times 10^{-7}$  |                       |
|                               | rs4846049        | PP                            | T/G      | 22659                  | 0.33                      | -0.2671(0.1006)        | $7.90 \times 10^{-3}$ |
|                               | HTN              | T/G                           | 25014    | 0.33                   | -0.0924(0.0217)           | $2.01 \times 10^{-5}$  |                       |
| AGT                           | DBP              | T/C                           | 22686    | 0.24                   | 0.5605(0.1123)            | $5.94 \times 10^{-7}$  |                       |
|                               | SBP              | T/C                           | 22686    | 0.24                   | 0.7299(0.1661)            | $1.11 \times 10^{-5}$  |                       |
|                               | MAP              | T/C                           | 22686    | 0.24                   | 0.5972(0.1230)            | $1.21 \times 10^{-6}$  |                       |
|                               | rs2004776        | PP                            | T/C      | 22686                  | 0.24                      | 0.3000(0.1100)         | $6.40 \times 10^{-3}$ |
|                               | HTN <sup>b</sup> | T/C                           | 25042    | 0.24                   | 0.1379(0.0235)            | $4.28 \times 10^{-9}$  |                       |
| NPR3                          | DBP              | G/C                           | 22662    | 0.39                   | -0.3903(0.0985)           | $7.39 \times 10^{-5}$  |                       |
|                               | SBP <sup>b</sup> | G/C                           | 22662    | 0.39                   | -0.6683(0.1461)           | $4.77 \times 10^{-6}$  |                       |
|                               | MAP              | G/C                           | 22662    | 0.39                   | -0.4761(0.1080)           | $1.04 \times 10^{-5}$  |                       |
|                               | rs1421811        | PP                            | G/C      | 22662                  | 0.39                      | -0.3737(0.0968)        | $1.13 \times 10^{-4}$ |
|                               | HTN              | G/C                           | 25018    | 0.39                   | -0.0895(0.0208)           | $1.66 \times 10^{-5}$  |                       |
| HFE                           | DBP <sup>b</sup> | G/C                           | 22677    | 0.15                   | 0.6164(0.1377)            | $7.56 \times 10^{-6}$  |                       |
|                               | SBP              | G/C                           | 22677    | 0.15                   | 0.6408(0.2048)            | $1.75 \times 10^{-3}$  |                       |
|                               | MAP              | G/C                           | 22677    | 0.15                   | 0.5949(0.1513)            | $8.43 \times 10^{-5}$  |                       |
|                               | rs1799945        | PP                            | G/C      | 22677                  | 0.15                      | 0.1605(0.1354)         | $2.36 \times 10^{-1}$ |
|                               | HTN              | G/C                           | 25034    | 0.15                   | 0.1089(0.0284)            | $1.25 \times 10^{-4}$  |                       |
| ATP2B1                        | DBP              | G/A                           | 22671    | 0.16                   | -0.6615(0.1319)           | $5.30 \times 10^{-7}$  |                       |
|                               | SBP              | G/A                           | 22671    | 0.16                   | -1.0013(0.1963)           | $3.37 \times 10^{-7}$  |                       |
|                               | MAP              | G/A                           | 22671    | 0.16                   | -0.7607(0.1449)           | $1.54 \times 10^{-7}$  |                       |
|                               | rs11105354       | PP                            | G/A      | 22671                  | 0.16                      | -0.4644(0.1298)        | $3.48 \times 10^{-4}$ |
|                               | HTN <sup>b</sup> | G/A                           | 25029    | 0.16                   | -0.1538(0.0276)           | $2.41 \times 10^{-8}$  |                       |

Notes: **a.** Results are shown for the 10 SNPs followed up in additional samples. **b.** Primary phenotype, which for each SNP is defined as the phenotype with smallest discovery analysis association *P* value.

Table S8: Followup results for top 10 SNPs and 5 BP phenotypes.

| Locus and SNP | Phenotype        | Alleles coded/<br>noncoded | <i>N</i> Coded<br>freq. | — Followup analysis —      |                                           |                           | Heterogeneity   |        |
|---------------|------------------|----------------------------|-------------------------|----------------------------|-------------------------------------------|---------------------------|-----------------|--------|
|               |                  |                            |                         | $\beta_{\text{SNP}}$ ( SE) | <i>P</i> value <sup>a</sup><br>one-tailed | <i>Q</i>                  | <i>P</i>        |        |
| NOS3          | DBP <sup>b</sup> | T/C                        | 21065                   | 0.09                       | 0.7820(0.2096)                            | $9.53 \times 10^{-5}$ *** | 18.96           | 0.0042 |
|               | SBP              | T/C                        | 21065                   | 0.09                       | 1.3059(0.3065)                            | $1.02 \times 10^{-5}$     | 12.31           | 0.0554 |
| rs3918226     | MAP              | T/C                        | 21065                   | 0.09                       | 0.9727(0.2312)                            | $1.30 \times 10^{-5}$     | 17.01           | 0.0093 |
|               | PP               | T/C                        | 21065                   | 0.09                       | 0.3066(0.2265)                            | $8.80 \times 10^{-2}$     | 5.23            | 0.5145 |
|               | HTN              | T/C                        | 21065                   | 0.09                       | 0.1560(0.0375)                            | $1.58 \times 10^{-5}$     | 17.79           | 0.0068 |
| LSP1/TNNT3    | DBP              | T/C                        | 39325                   | 0.55                       | -0.2245(0.0794)                           | $2.35 \times 10^{-3}$     | 9.12            | 0.17   |
|               | SBP              | T/C                        | 39345                   | 0.55                       | -0.4293(0.1162)                           | $1.11 \times 10^{-4}$     | 8.72            | 0.19   |
|               | MAP <sup>b</sup> | T/C                        | 39335                   | 0.55                       | -0.3067(0.0868)                           | $2.04 \times 10^{-4}$ **  | 9.97            | 0.13   |
| rs661348      | PP               | T/C                        | 39335                   | 0.55                       | -0.1498(0.0819)                           | $3.37 \times 10^{-2}$     | 5.21            | 0.52   |
|               | HTN              | T/C                        | 32115                   | 0.55                       | -0.0260(0.0179)                           | $7.37 \times 10^{-2}$     | 6.06            | 0.42   |
| SOX6          | DBP              | T/C                        | 53754                   | 0.19                       | 0.2628(0.0866)                            | $1.21 \times 10^{-3}$     | 9.62            | 0.21   |
|               | SBP              | T/C                        | 53750                   | 0.19                       | 0.3298(0.1287)                            | $5.19 \times 10^{-3}$     | 7.03            | 0.43   |
|               | MAP <sup>b</sup> | T/C                        | 50002                   | 0.19                       | 0.2979(0.0980)                            | $1.19 \times 10^{-3}$ *   | 8.94            | 0.18   |
| rs2014408     | PP               | T/C                        | 50002                   | 0.19                       | -0.0044(0.0899)                           | $5.19 \times 10^{-1}$     | 5.87            | 0.44   |
|               | HTN              | T/C                        | 42165                   | 0.19                       | 0.0526(0.0196)                            | $3.70 \times 10^{-3}$     | 8.46            | 0.29   |
| NUCB2-ABCC8   | DBP              | G/A                        | 51239                   | 0.58                       | -0.1713(0.0721)                           | $8.75 \times 10^{-3}$     | 11.11           | 0.09   |
|               | SBP              | G/A                        | 51228                   | 0.58                       | -0.2401(0.1063)                           | $1.19 \times 10^{-2}$     | 17.01           | 0.01   |
|               | MAP              | G/A                        | 51233                   | 0.58                       | -0.1890(0.0791)                           | $8.41 \times 10^{-3}$     | 15.35           | 0.02   |
| rs2074311     | PP <sup>b</sup>  | G/A                        | 51233                   | 0.58                       | -0.1048(0.0731)                           | $7.58 \times 10^{-2}$ NS  | 9.96            | 0.13   |
|               | HTN              | G/A                        | 38444                   | 0.58                       | -0.0246(0.0168)                           | $7.08 \times 10^{-2}$     | 9.35            | 0.15   |
| CACNA1C       | DBP <sup>b</sup> | T/C                        | 58028                   | 0.61                       | 0.1026(0.0692)                            | $6.91 \times 10^{-2}$ NS  | 3.43            | 0.84   |
|               | SBP              | T/C                        | 58024                   | 0.61                       | 0.1479(0.1024)                            | $7.43 \times 10^{-2}$     | 6.32            | 0.50   |
|               | MAP              | T/C                        | 54314                   | 0.61                       | 0.1148(0.0780)                            | $7.06 \times 10^{-2}$     | 4.55            | 0.60   |
| rs3819526     | PP               | T/C                        | 54314                   | 0.61                       | 0.0735(0.0721)                            | $1.54 \times 10^{-1}$     | 4.13            | 0.66   |
|               | HTN              | T/C                        | 43673                   | 0.61                       | 0.0155(0.0159)                            | $1.65 \times 10^{-1}$     | 4.62            | 0.71   |
| MTHFR-NPPB    | DBP <sup>b</sup> | T/G                        | 32267                   | 0.31                       | -0.3353(0.0928)                           | $1.52 \times 10^{-4}$ **  | NA <sup>c</sup> |        |
|               | SBP              | T/G                        | 32263                   | 0.31                       | -0.4831(0.1380)                           | $2.33 \times 10^{-4}$     | NA <sup>c</sup> |        |
|               | MAP              | T/G                        | 32265                   | 0.31                       | -0.3840(0.1017)                           | $7.98 \times 10^{-5}$     | NA <sup>c</sup> |        |
|               | PP               | T/G                        | 32265                   | 0.31                       | -0.0933(0.0902)                           | $1.50 \times 10^{-1}$     | NA <sup>c</sup> |        |
|               | HTN              | T/G                        | 18479                   | 0.31                       | -0.0740(0.0274)                           | $3.48 \times 10^{-3}$     | NA <sup>c</sup> |        |
| AGT           | DBP              | T/C                        | 86588                   | 0.23                       | 0.3200(0.0587)                            | $2.50 \times 10^{-8}$     | NA <sup>c</sup> |        |
|               | SBP              | T/C                        | 86588                   | 0.23                       | 0.4200(0.0909)                            | $1.90 \times 10^{-6}$     | NA <sup>c</sup> |        |
|               | MAP              | T/C                        | 32586                   | 0.23                       | 0.1014(0.1132)                            | $1.85 \times 10^{-1}$     | NA <sup>c</sup> |        |
|               | PP               | T/C                        | 32586                   | 0.23                       | 0.0213(0.1000)                            | $4.16 \times 10^{-1}$     | NA <sup>c</sup> |        |
|               | HTN <sup>b</sup> | T/C                        | 86588                   | 0.23                       | 0.0800(0.0157)                            | $1.85 \times 10^{-7}$ *** | NA <sup>c</sup> |        |
| NPR3          | DBP              | G/C                        | 29220                   | 0.38                       | -0.1560(0.0928)                           | $4.64 \times 10^{-2}$     | NA <sup>c</sup> |        |
|               | SBP <sup>b</sup> | G/C                        | 29188                   | 0.38                       | -0.3715(0.1379)                           | $3.53 \times 10^{-3}$ *   | NA <sup>c</sup> |        |
|               | MAP              | G/C                        | 29204                   | 0.38                       | -0.2372(0.1016)                           | $9.79 \times 10^{-3}$     | NA <sup>c</sup> |        |
|               | PP               | G/C                        | 29204                   | 0.38                       | -0.2185(0.0903)                           | $7.78 \times 10^{-3}$     | NA <sup>c</sup> |        |
|               | HTN              | G/C                        | 16907                   | 0.38                       | -0.0733(0.0277)                           | $4.05 \times 10^{-3}$     | NA <sup>c</sup> |        |
| HFE           | DBP <sup>b</sup> | G/C                        | 32308                   | 0.14                       | 0.4998(0.1236)                            | $2.62 \times 10^{-5}$ *** | NA <sup>c</sup> |        |
|               | SBP              | G/C                        | 32294                   | 0.14                       | 0.6619(0.1858)                            | $1.83 \times 10^{-4}$     | NA <sup>c</sup> |        |
|               | MAP              | G/C                        | 32301                   | 0.14                       | 0.5653(0.1363)                            | $1.67 \times 10^{-5}$     | NA <sup>c</sup> |        |
|               | PP               | G/C                        | 32301                   | 0.14                       | 0.1774(0.1191)                            | $6.82 \times 10^{-2}$     | NA <sup>c</sup> |        |
|               | HTN              | G/C                        | 18451                   | 0.14                       | 0.1516(0.0369)                            | $1.96 \times 10^{-5}$     | NA <sup>c</sup> |        |
| ATP2B1        | DBP              | G/A                        | 33024                   | 0.15                       | -0.3433(0.1199)                           | $2.09 \times 10^{-3}$     | NA <sup>c</sup> |        |
|               | SBP              | G/A                        | 33021                   | 0.15                       | -0.5942(0.1815)                           | $5.30 \times 10^{-4}$     | NA <sup>c</sup> |        |
|               | MAP              | G/A                        | 33022                   | 0.15                       | -0.4273(0.1328)                           | $6.44 \times 10^{-4}$     | NA <sup>c</sup> |        |
|               | PP               | G/A                        | 33022                   | 0.15                       | -0.2425(0.1152)                           | $1.76 \times 10^{-2}$     | NA <sup>c</sup> |        |
| rs11105354    | HTN <sup>b</sup> | G/A                        | 18760                   | 0.15                       | -0.1196(0.0361)                           | $4.55 \times 10^{-4}$ **  | NA <sup>c</sup> |        |

Notes: **a.** Only the primary phenotype for each SNP was tested, using a one-tailed test with effect direction pre-specified by the discovery analysis. With Bonferroni correction for 10 independent tests, results are annotated \*  $P \leq 0.05/10$ ; \*\*  $P \leq 0.01/10$ ; \*\*\*  $P < 0.001/10$ . **b.** Primary phenotype (see Table S7). **c.** Heterogeneity test not performed when followup data were from existing meta-analysis results.

Table S9: Discovery and followup combined results for top 10 SNPs and 5 BP phenotypes

| Locus<br>and SNP         | Phenotype        | Alleles<br>coded/<br>noncoded | — Combined <sup>a</sup> analysis — |                            |                        |
|--------------------------|------------------|-------------------------------|------------------------------------|----------------------------|------------------------|
|                          |                  |                               | <i>N</i>                           | $\beta_{\text{SNP}}$ ( SE) | <i>P</i> value         |
| NOS3<br>rs3918226        | DBP <sup>b</sup> | T/C                           | 43758                              | 0.8079(0.1350)             | $2.19 \times 10^{-9}$  |
|                          | SBP              | T/C                           | 43758                              | 0.9590(0.1970)             | $1.12 \times 10^{-6}$  |
|                          | MAP              | T/C                           | 43758                              | 0.8391(0.1477)             | $1.34 \times 10^{-8}$  |
|                          | PP               | T/C                           | 43758                              | 0.1472(0.1360)             | $2.79 \times 10^{-1}$  |
|                          | HTN              | T/C                           | 46115                              | 0.1440(0.0262)             | $3.95 \times 10^{-8}$  |
| LSP1/TNNT3<br>rs661348   | DBP              | T/C                           | 62009                              | -0.3663(0.0612)            | $2.22 \times 10^{-9}$  |
|                          | SBP              | T/C                           | 62029                              | -0.5938(0.0901)            | $4.32 \times 10^{-11}$ |
|                          | MAP <sup>b</sup> | T/C                           | 62019                              | -0.4454(0.0670)            | $2.98 \times 10^{-11}$ |
|                          | PP               | T/C                           | 62019                              | -0.2567(0.0619)            | $3.37 \times 10^{-5}$  |
|                          | HTN              | T/C                           | 57157                              | -0.0664(0.0134)            | $7.86 \times 10^{-7}$  |
| SOX6<br>rs2014408        | DBP              | T/C                           | 76444                              | 0.3448(0.0699)             | $8.11 \times 10^{-7}$  |
|                          | SBP              | T/C                           | 76440                              | 0.4855(0.1039)             | $2.99 \times 10^{-6}$  |
|                          | MAP <sup>b</sup> | T/C                           | 72692                              | 0.3987(0.0783)             | $3.52 \times 10^{-7}$  |
|                          | PP               | T/C                           | 72692                              | 0.1455(0.0712)             | $4.11 \times 10^{-2}$  |
|                          | HTN              | T/C                           | 67213                              | 0.0640(0.0154)             | $3.20 \times 10^{-5}$  |
| NUCB2-ABCC8<br>rs2074311 | DBP              | G/A                           | 73898                              | -0.1916(0.0579)            | $9.29 \times 10^{-4}$  |
|                          | SBP              | G/A                           | 73887                              | -0.3669(0.0854)            | $1.73 \times 10^{-5}$  |
|                          | MAP              | G/A                           | 73892                              | -0.2463(0.0634)            | $1.03 \times 10^{-4}$  |
|                          | PP <sup>b</sup>  | G/A                           | 73892                              | -0.2319(0.0580)            | $6.33 \times 10^{-5}$  |
|                          | HTN              | G/A                           | 63461                              | -0.0344(0.0129)            | $7.81 \times 10^{-3}$  |
| CACNA1C<br>rs3819526     | DBP <sup>b</sup> | T/C                           | 80690                              | 0.2242(0.0566)             | $7.53 \times 10^{-5}$  |
|                          | SBP              | T/C                           | 80686                              | 0.2942(0.0837)             | $4.40 \times 10^{-4}$  |
|                          | MAP              | T/C                           | 76976                              | 0.2447(0.0632)             | $1.08 \times 10^{-4}$  |
|                          | PP               | T/C                           | 76976                              | 0.1373(0.0577)             | $1.74 \times 10^{-2}$  |
|                          | HTN              | T/C                           | 68693                              | 0.0381(0.0126)             | $2.57 \times 10^{-3}$  |
| MTHFR-NPPB<br>rs4846049  | DBP <sup>b</sup> | T/G                           | 54926                              | -0.4336(0.0688)            | $2.96 \times 10^{-10}$ |
|                          | SBP              | T/G                           | 54922                              | -0.5782(0.1021)            | $1.48 \times 10^{-8}$  |
|                          | MAP              | T/G                           | 54924                              | -0.4724(0.0754)            | $3.71 \times 10^{-10}$ |
|                          | PP               | T/G                           | 54924                              | -0.1708(0.0671)            | $1.10 \times 10^{-2}$  |
|                          | HTN              | T/G                           | 43493                              | -0.0853(0.0170)            | $5.20 \times 10^{-7}$  |
| AGT<br>rs2004776         | DBP              | T/C                           | 109274                             | 0.3716(0.0520)             | $9.03 \times 10^{-13}$ |
|                          | SBP              | T/C                           | 109274                             | 0.4914(0.0797)             | $7.10 \times 10^{-10}$ |
|                          | MAP              | T/C                           | 55272                              | 0.3288(0.0833)             | $7.92 \times 10^{-5}$  |
|                          | PP               | T/C                           | 55272                              | 0.1474(0.0740)             | $4.64 \times 10^{-2}$  |
|                          | HTN <sup>b</sup> | T/C                           | 111630                             | 0.0979(0.0131)             | $6.74 \times 10^{-14}$ |
| NPR3<br>rs1421811        | DBP              | G/C                           | 51882                              | -0.2662(0.0675)            | $8.09 \times 10^{-5}$  |
|                          | SBP <sup>b</sup> | G/C                           | 51850                              | -0.5113(0.1003)            | $3.41 \times 10^{-7}$  |
|                          | MAP              | G/C                           | 51866                              | -0.3494(0.0740)            | $2.36 \times 10^{-6}$  |
|                          | PP               | G/C                           | 51866                              | -0.2907(0.0660)            | $1.07 \times 10^{-5}$  |
|                          | HTN              | G/C                           | 41925                              | -0.0837(0.0166)            | $4.80 \times 10^{-7}$  |
| HFE<br>rs1799945         | DBP <sup>b</sup> | G/C                           | 54985                              | 0.5518(0.0920)             | $1.97 \times 10^{-9}$  |
|                          | SBP              | G/C                           | 54971                              | 0.6523(0.1376)             | $2.12 \times 10^{-6}$  |
|                          | MAP              | G/C                           | 54978                              | 0.5786(0.1013)             | $1.10 \times 10^{-8}$  |
|                          | PP               | G/C                           | 54978                              | 0.1701(0.0894)             | $5.73 \times 10^{-2}$  |
|                          | HTN              | G/C                           | 43485                              | 0.1248(0.0225)             | $2.89 \times 10^{-8}$  |
| ATP2B1<br>rs11105354     | DBP              | G/A                           | 55695                              | -0.4872(0.0887)            | $3.95 \times 10^{-8}$  |
|                          | SBP              | G/A                           | 55692                              | -0.7818(0.1332)            | $4.43 \times 10^{-9}$  |
|                          | MAP              | G/A                           | 55693                              | -0.5794(0.0979)            | $3.25 \times 10^{-9}$  |
|                          | PP               | G/A                           | 55693                              | -0.3402(0.0862)            | $7.86 \times 10^{-5}$  |
|                          | HTN <sup>b</sup> | G/A                           | 43789                              | -0.1412(0.0219)            | $1.14 \times 10^{-10}$ |

Notes: **a.** Our combined analysis was performed using all discovery and followup data. **b.** Primary phenotype (see Table S7).

Table S10: Low frequency variant associations tested using gene dosage model.

| Gene <sup>a</sup>           | -Num RV <sup>b</sup> - |     | -Mean RV <sup>c</sup> - |      | -SD RV <sup>c</sup> - |      | Best pheno <sup>d</sup> | -Association <i>P</i> value- |      |                      |
|-----------------------------|------------------------|-----|-------------------------|------|-----------------------|------|-------------------------|------------------------------|------|----------------------|
|                             | AABN                   | MN  | AABN                    | MN   | AABN                  | MN   |                         | AABN                         | MN   | Combined             |
| <i>TGFBR2</i>               | 43                     | 37  | 0.86                    | 0.75 | 1.28                  | 1.05 | MAP                     | $1.3 \times 10^{-3}$         | 0.43 | $1.9 \times 10^{-3}$ |
| <i>SCP2</i>                 | 21                     | 22  | 0.58                    | 0.63 | 1.3                   | 1.35 | DBP                     | 0.14                         | 0.06 | 0.02                 |
| <i>IGF1R</i>                | 73                     | 73  | 2.85                    | 3.33 | 4.76                  | 5.55 | MAP                     | 0.05                         | 0.20 | 0.02                 |
| <i>PCSK6</i>                | 31                     | 31  | 0.63                    | 0.75 | 0.89                  | 1.08 | HTN                     | 0.16                         | 0.09 | 0.03                 |
| <i>NFKB1</i>                | 35                     | 26  | 1.04                    | 0.58 | 1.66                  | 0.92 | MAP                     | 0.02                         | 0.82 | 0.03                 |
| <i>TRAF2</i>                | 24                     | 21  | 0.42                    | 0.46 | 1                     | 1.02 | HTN                     | 0.08                         | 0.34 | 0.04                 |
| <i>UMOD</i> <sup>e</sup>    | 1                      | 1   | 0.10                    | 0.01 | 0.31                  | 0.12 | DBP                     | 0.07                         | 0.41 | 0.05                 |
| <i>LRP2</i>                 | 27                     | 26  | 0.59                    | 0.8  | 1.04                  | 1.24 | HTN                     | 0.08                         | 0.32 | 0.05                 |
| <i>PPARD</i>                | 46                     | 48  | 1.36                    | 1.38 | 2.77                  | 3.25 | DBP                     | 0.19                         | 0.15 | 0.05                 |
| <i>ABCA4</i>                | 24                     | 24  | 1.02                    | 1.1  | 1.45                  | 1.7  | DBP                     | 0.63                         | 0.02 | 0.05                 |
| <i>NRG3</i>                 | 140                    | 113 | 4.98                    | 3.81 | 4.77                  | 3.91 | HTN                     | 0.04                         | 0.81 | 0.05                 |
| <i>CD36</i>                 | 30                     | 33  | 0.9                     | 0.9  | 2.28                  | 2.63 | SBP                     | 0.89                         | 0.01 | 0.06                 |
| <i>NPPB</i> <sup>e</sup>    | 5                      | 4   | 0.18                    | 0.2  | 0.41                  | 0.43 | PP                      | 0.06                         | 0.45 | 0.06                 |
| <i>IL1R1</i>                | 21                     | 22  | 0.37                    | 0.34 | 0.78                  | 0.77 | PP                      | 0.57                         | 0.03 | 0.06                 |
| <i>F5</i>                   | 39                     | 33  | 0.74                    | 0.79 | 0.9                   | 1.05 | PP                      | 0.03                         | 0.66 | 0.07                 |
| <i>RYR2</i>                 | 65                     | 69  | 1.92                    | 2.29 | 2.23                  | 2.39 | PP                      | 0.40                         | 0.08 | 0.07                 |
| <i>FLT1</i>                 | 22                     | 21  | 0.46                    | 0.62 | 0.81                  | 0.88 | PP                      | 0.07                         | 0.52 | 0.08                 |
| <i>CYP1A2</i> <sup>e</sup>  | 3                      | 3   | 0.14                    | 0.13 | 0.45                  | 0.45 | HTN                     | 0.08                         | 0.59 | 0.08                 |
| <i>PCSK5</i>                | 22                     | 26  | 0.99                    | 0.83 | 1.22                  | 1.14 | PP                      | 0.19                         | 0.28 | 0.09                 |
| <i>ADRB1</i>                | 11                     | 11  | 0.37                    | 0.38 | 0.66                  | 0.68 | SBP                     | 0.39                         | 0.13 | 0.10                 |
| <i>RUNX1</i>                | 30                     | 27  | 0.78                    | 0.69 | 1.41                  | 1.31 | SBP                     | 0.12                         | 0.52 | 0.11                 |
| <i>NPR3</i> <sup>e</sup>    | 1                      | 2   | 0                       | 0    | 0.04                  | 0.03 | DBP                     | 0.39                         | 0.13 | 0.11                 |
| <i>SORCS1</i>               | 50                     | 50  | 1.24                    | 1.41 | 2                     | 2.28 | DBP                     | 0.13                         | 0.48 | 0.11                 |
| <i>ABCC4</i>                | 34                     | 25  | 0.9                     | 0.66 | 1.59                  | 0.98 | PP                      | 0.36                         | 0.12 | 0.12                 |
| <i>NOS1</i>                 | 52                     | 55  | 0.69                    | 0.56 | 1.22                  | 1.07 | PP                      | 0.22                         | 0.38 | 0.13                 |
| <i>PON1</i>                 | 21                     | 23  | 0.3                     | 0.56 | 1                     | 1.1  | HTN                     | 0.14                         | 0.62 | 0.14                 |
| <i>LTB</i>                  | 20                     | 21  | 0.39                    | 0.7  | 0.65                  | 1.2  | HTN                     | 0.03                         | 0.98 | 0.14                 |
| <i>CUBN</i>                 | 36                     | 34  | 1.06                    | 1.4  | 1.77                  | 2.41 | DBP                     | 0.94                         | 0.05 | 0.14                 |
| <i>TFPI</i>                 | 24                     | 20  | 0.53                    | 0.87 | 0.98                  | 1.23 | DBP                     | 0.02                         | 0.93 | 0.15                 |
| <i>IGF1</i>                 | 29                     | 21  | 0.82                    | 1.03 | 1.53                  | 1.75 | DBP                     | 0.16                         | 0.54 | 0.15                 |
| <i>TNNI3K</i>               | 23                     | 22  | 0.49                    | 0.82 | 0.92                  | 1.26 | PP                      | 0.03                         | 0.95 | 0.15                 |
| <i>CPA6</i>                 | 21                     | 20  | 0.49                    | 0.64 | 1.09                  | 1.23 | DBP                     | 0.36                         | 0.27 | 0.15                 |
| <i>PCSK9</i>                | 32                     | 30  | 1.08                    | 1.2  | 1.99                  | 1.97 | HTN                     | 0.36                         | 0.28 | 0.18                 |
| <i>FTO</i>                  | 65                     | 62  | 2.22                    | 2.5  | 2.63                  | 2.9  | PP                      | 0.22                         | 0.52 | 0.18                 |
| <i>MSRA</i>                 | 26                     | 26  | 0.83                    | 0.87 | 1.32                  | 1.42 | PP                      | 0.85                         | 0.03 | 0.19                 |
| <i>PRKCB</i>                | 24                     | 20  | 0.59                    | 0.61 | 0.85                  | 0.84 | PP                      | 0.86                         | 0.03 | 0.20                 |
| <i>AGT</i>                  | 24                     | 17  | 0.78                    | 0.8  | 1.14                  | 1.12 | HTN                     | 0.11                         | 0.84 | 0.21                 |
| <i>CDKN2BAS</i>             | 26                     | 31  | 0.24                    | 0.23 | 0.84                  | 0.88 | HTN                     | 0.08                         | 0.74 | 0.22                 |
| <i>SOX6</i> <sup>e</sup>    | 14                     | 13  | 0.16                    | 0.23 | 0.65                  | 0.87 | DBP                     | 0.32                         | 0.45 | 0.22                 |
| <i>SLC12A3</i> <sup>f</sup> | 6                      | 7   | 0.2                     | 0.21 | 0.44                  | 0.45 | SBP                     | 0.39                         | 0.39 | 0.23                 |
| <i>TNF</i>                  | 20                     | 21  | 0.38                    | 0.72 | 0.62                  | 1.21 | HTN                     | 0.06                         | 0.98 | 0.23                 |
| <i>VDR</i>                  | 26                     | 20  | 0.67                    | 0.62 | 1.16                  | 1.09 | PP                      | 0.54                         | 0.25 | 0.23                 |
| <i>LSP1</i> <sup>e</sup>    | 2                      | 1   | 0.17                    | 0.07 | 0.48                  | 0.26 | PP                      | 0.41                         | 0.28 | 0.23                 |
| <i>LDLR</i>                 | 24                     | 23  | 0.48                    | 0.65 | 0.75                  | 0.87 | PP                      | 0.92                         | 0.08 | 0.25                 |
| <i>GATA4</i> <sup>e</sup>   | 9                      | 9   | 0.08                    | 0.06 | 0.36                  | 0.32 | HTN                     | 0.14                         | 0.80 | 0.25                 |
| <i>ARHGAP6</i>              | 35                     | 43  | 2.22                    | 2.61 | 6.05                  | 6.95 | DBP                     | 0.32                         | 0.54 | 0.25                 |
| <i>PDE4B</i>                | 39                     | 40  | 0.75                    | 1.26 | 1.72                  | 2.17 | SBP                     | 0.51                         | 0.35 | 0.26                 |
| <i>PDE11A</i>               | 20                     | 20  | 0.34                    | 0.33 | 0.67                  | 0.6  | HTN                     | 0.34                         | 0.58 | 0.27                 |
| <i>CHUK</i>                 | 26                     | 28  | 0.89                    | 1.02 | 1.45                  | 1.46 | HTN                     | 0.03                         | 0.18 | 0.27                 |
| <i>ACOT11</i>               | 21                     | 21  | 0.73                    | 0.79 | 1.57                  | 1.52 | PP                      | 0.51                         | 0.01 | 0.28                 |

| Gene <sup>a</sup>          | –Num RV <sup>b</sup> – |    | –Mean RV <sup>c</sup> – |      | –SD RV <sup>c</sup> – |      | Best pheno <sup>d</sup> | –Association <i>P</i> value– |      |          |
|----------------------------|------------------------|----|-------------------------|------|-----------------------|------|-------------------------|------------------------------|------|----------|
|                            | AABN                   | MN | AABN                    | MN   | AABN                  | MN   |                         | AABN                         | MN   | Combined |
| <i>PPARA</i>               | 31                     | 28 | 0.39                    | 0.5  | 0.85                  | 0.82 | PP                      | 0.60                         | 0.30 | 0.29     |
| <i>SCARB1</i>              | 25                     | 24 | 0.53                    | 0.62 | 1.39                  | 1.76 | PP                      | 0.78                         | 0.11 | 0.31     |
| <i>NRG1</i>                | 103                    | 82 | 1.99                    | 2.52 | 3.68                  | 4.04 | DBP                     | 0.07                         | 0.66 | 0.32     |
| <i>ESR1</i>                | 79                     | 82 | 2.13                    | 2.34 | 2.5                   | 2.9  | HTN                     | 0.36                         | 0.71 | 0.34     |
| <i>ALOX5AP</i>             | 27                     | 29 | 0.97                    | 1    | 1.34                  | 1.22 | DBP                     | 0.93                         | 0.16 | 0.34     |
| <i>TMEM117</i>             | 22                     | 29 | 0.69                    | 0.97 | 1.44                  | 1.62 | HTN                     | 0.20                         | 0.88 | 0.34     |
| <i>CLCN6<sup>e</sup></i>   | 4                      | 5  | 0.08                    | 0.27 | 0.27                  | 0.64 | HTN                     | 0.45                         | 0.53 | 0.35     |
| <i>ABCA1</i>               | 25                     | 21 | 0.77                    | 1.04 | 1.29                  | 1.51 | DBP                     | 0.59                         | 0.46 | 0.36     |
| <i>NOS3</i>                | 21                     | 24 | 0.14                    | 0.17 | 0.38                  | 0.41 | MAP                     | 0.94                         | 0.18 | 0.39     |
| <i>LIPC</i>                | 35                     | 30 | 0.84                    | 0.94 | 1.41                  | 1.69 | DBP                     | 0.83                         | 0.34 | 0.40     |
| <i>RXRA</i>                | 49                     | 44 | 0.84                    | 1.13 | 1.08                  | 1.44 | HTN                     | 0.42                         | 0.74 | 0.40     |
| <i>SLC12A1<sup>f</sup></i> | 5                      | 14 | 0.15                    | 0.29 | 0.53                  | 0.81 | HTN                     | 0.35                         | 0.83 | 0.40     |
| <i>TCF7L2</i>              | 21                     | 20 | 0.35                    | 0.33 | 0.6                   | 0.61 | PP                      | 0.83                         | 0.36 | 0.45     |
| <i>KCNH8</i>               | 29                     | 32 | 0.66                    | 0.86 | 1.36                  | 1.72 | PP                      | 0.12                         | 0.67 | 0.45     |
| <i>NPPA<sup>e</sup></i>    | 3                      | 2  | 0.1                     | 0.12 | 0.32                  | 0.34 | PP                      | 0.21                         | 0.84 | 0.45     |
| <i>VLDLR</i>               | 40                     | 29 | 0.84                    | 0.8  | 1.56                  | 1.63 | HTN                     | 0.31                         | 0.86 | 0.45     |
| <i>TNFRSF1B</i>            | 41                     | 31 | 1.18                    | 1.31 | 2.29                  | 2.38 | DBP                     | 0.85                         | 0.37 | 0.46     |
| <i>GAS7</i>                | 34                     | 33 | 0.63                    | 0.68 | 1.06                  | 1.11 | HTN                     | 0.32                         | 0.84 | 0.47     |
| <i>RIPK1</i>               | 32                     | 32 | 1.03                    | 1.06 | 2.15                  | 2.1  | MAP                     | 0.05                         | 0.17 | 0.49     |
| <i>STARD13</i>             | 23                     | 20 | 0.46                    | 0.64 | 1.05                  | 1.3  | PP                      | 0.66                         | 0.60 | 0.49     |
| <i>CDKAL1</i>              | 39                     | 44 | 1.37                    | 1.63 | 1.75                  | 2.23 | PP                      | 0.45                         | 0.83 | 0.50     |
| <i>FDFT1<sup>e</sup></i>   | 6                      | 4  | 0.12                    | 0.05 | 0.45                  | 0.24 | HTN                     | 0.79                         | 0.18 | 0.50     |
| <i>NOS2</i>                | 27                     | 23 | 0.53                    | 0.63 | 0.86                  | 0.91 | PP                      | 0.46                         | 0.87 | 0.51     |
| <i>APOB</i>                | 47                     | 38 | 0.64                    | 0.78 | 0.88                  | 0.93 | PP                      | 0.45                         | 0.91 | 0.52     |
| <i>BCL2</i>                | 67                     | 54 | 1.95                    | 2.03 | 2.3                   | 2.09 | HTN                     | 0.54                         | 0.83 | 0.52     |
| <i>MTHFR<sup>e</sup></i>   | 5                      | 7  | 0.01                    | 0.27 | 0.08                  | 0.64 | HTN                     | 0.91                         | 0.53 | 0.52     |
| <i>AGTR1</i>               | 28                     | 21 | 0.54                    | 0.41 | 1.14                  | 0.86 | PP                      | 0.64                         | 0.68 | 0.54     |
| <i>CACNA1C</i>             | 70                     | 63 | 2.31                    | 2.31 | 2.72                  | 2.68 | HTN                     | 0.84                         | 0.13 | 0.55     |
| <i>CYP1A1<sup>e</sup></i>  | 3                      | 5  | 0.05                    | 0.17 | 0.23                  | 0.4  | PP                      | 0.79                         | 0.41 | 0.59     |
| <i>TNNT3<sup>e</sup></i>   | 1                      | 1  | 0.02                    | 0.02 | 0.13                  | 0.15 | HTN                     | 0.33                         | 0.67 | 0.60     |
| <i>GPR98</i>               | 28                     | 30 | 0.82                    | 0.73 | 1.34                  | 1.3  | HTN                     | 0.67                         | 0.76 | 0.61     |
| <i>CYP17A1<sup>e</sup></i> | 1                      | 1  | 0                       | 0    | 0.03                  | 0.04 | DBP                     | 0.58                         | 0.25 | 0.62     |
| <i>KCNQ1</i>               | 35                     | 28 | 1.13                    | 0.8  | 1.62                  | 1.06 | PP                      | 0.71                         | 0.74 | 0.62     |
| <i>MSR1</i>                | 31                     | 39 | 0.5                     | 1.32 | 0.91                  | 2.82 | PP                      | 0.42                         | 0.87 | 0.66     |
| <i>FAS</i>                 | 22                     | 20 | 0.29                    | 0.38 | 0.63                  | 0.73 | DBP                     | 0.29                         | 0.66 | 0.66     |
| <i>APP</i>                 | 52                     | 51 | 1.87                    | 2.48 | 4.77                  | 5.77 | HTN                     | 0.29                         | 0.47 | 0.66     |
| <i>F13A1</i>               | 23                     | 22 | 0.6                     | 0.6  | 0.83                  | 0.85 | HTN                     | 0.65                         | 0.93 | 0.67     |
| <i>LRP1</i>                | 37                     | 36 | 1.17                    | 1.04 | 1.33                  | 1.17 | PP                      | 0.29                         | 0.49 | 0.67     |
| <i>FURIN<sup>e</sup></i>   | 3                      | 3  | 0.01                    | 0    | 0.11                  | 0.07 | HTN                     | 0.69                         | 0.94 | 0.69     |
| <i>NOS1AP</i>              | 51                     | 51 | 2.16                    | 2.02 | 3.12                  | 2.96 | HTN                     | 0.24                         | 0.21 | 0.70     |
| <i>PPARG</i>               | 28                     | 25 | 0.48                    | 0.6  | 0.98                  | 1.19 | DBP                     | 0.43                         | 0.22 | 0.72     |
| <i>TBXAS1</i>              | 40                     | 37 | 1.02                    | 1.02 | 1.49                  | 1.66 | HTN                     | 0.52                         | 0.65 | 0.78     |
| <i>ATP2B1<sup>e</sup></i>  | 5                      | 5  | 0.22                    | 0.17 | 0.57                  | 0.7  | SBP                     | 0.77                         | 0.91 | 0.90     |

Notes: **a.** We tested all genes with  $\geq 20$  low frequency ( $0 < \text{MAF} \leq 0.05$ ) variants genotyped on the HumanCVD BeadChip, plus genes where either rare or common variant associations had been reported previously. **b.** For each gene, “Num RV” is the number of low frequency SNPs (extending 50kb from transcript ends), reported separately for the UK/Irish ancestry (AIBIII+ASCOT+BRIGHT+NBS; “AABN”) and Nordic ancestry (MDC+NORDIL; “MN”) datasets. **c.** “Mean RV” and “SD RV” are the mean and SD of low frequency allele dosage (count) over individuals. **d.** For each gene we tested association between each BP phenotype and the low frequency allele dosage. For testing five phenotypes and 93 genes, we use a significance threshold  $P < 0.05 / (2.758 \times 93) = 1.9 \times 10^{-4}$  to control the FWER at 5%. Because no associations were significant at this threshold, we present association results only for the most significantly associated phenotype (“best pheno”). **e.** Gene included because nearby common variant association discovered here (Table 1) or previously (Table S12). **f.** Gene included because rare variant association reported previously (Ji *et al.* 2008).

Table S11: **CNV tag-SNP results** for eight index SNPs.

| Locus      | Index SNP  | Tag SNP <sup>a</sup>   | $-r^2$ - <sup>b</sup> |         | CNV<br>Name | -CNV-   |         |      |
|------------|------------|------------------------|-----------------------|---------|-------------|---------|---------|------|
|            |            |                        | index:tag             | tag:CNV |             | Start   | End     | Type |
| MTHFR-NPPB | rs4846049  | NA                     |                       |         |             |         |         |      |
| AGT        | rs2004776  | NA                     |                       |         |             |         |         |      |
| NPR3       | rs1421811  | NA                     |                       |         |             |         |         |      |
| HFE        | rs1799945  | NA                     |                       |         |             |         |         |      |
| NOS3       | rs3918226  | NA                     |                       |         |             |         |         |      |
| LSP1/TNNT3 | rs661348   | rs3817197 <sup>c</sup> | 0.24                  | 1.00    | CNVR5019.1  | 1862691 | 1864048 | gain |
| SOX6       | rs2014408  | NA                     |                       |         |             |         |         |      |
| ATP2B1     | rs11105354 | NA                     |                       |         |             |         |         |      |

Notes: **a.** We obtained lists of CNV-tSNPs from four sources: (i) 261 CNV-tSNPs, which tag CNVs at  $r^2 > 0.8$ , generated at the Broad Institute by typing HapMap samples on the Affymetrix 6.0 array. (ii) 2,174 CNV-tSNPs, which tag CNVs at  $r^2 > 0.8$ , made available by the Genomic Structural Variation consortium and based largely on typing 450 HapMap samples on a custom-made Agilent 105K array that is capable of genotyping  $\sim 3,320$  CNVs in HapMap CEU. (iii) 3,113 CNV-tSNPs, generated using HapMap phase III samples genotyped using Affymetrix 6.0 and Illumina 1M arrays, generated by the HapMap 3 project. (iv) 2,905 CNV-tSNPs, generated using  $\sim 19,000$  samples of European ancestry genotyped by the Wellcome Trust Case Control Consortium (3,000 controls and 2,000 cases for each of 8 diseases) using the same custom-made Agilent 105K array as used in (ii). Because these CNV-tSNP lists were derived using HapMap data but only list the best tagging SNP for each CNV, we first identified all  $r^2 > 0.2$  proxies for our eight index SNPs using HapMap CEU r22, and then searched for all index SNPs plus these proxy SNPs in the CNV-tSNP lists. **b.** For tag SNPs thus identified we report the  $r^2$  between the BP index SNP and the tag SNP, and the  $r^2$  between the tag SNP and the CNV itself. **c.** The only CNV-tSNP identified was rs3817197, which is an almost perfect tag ( $r^2 > 0.99$ ) for CNVR5019.1 and therefore we considered CNV-tSNP genotype to be equivalent to the genotype at the CNV itself. However, the CNV-tSNP rs3817197 is in relatively weak LD with our index SNP rs661348 at the LSP1/TNNT3 locus. The CNV-tSNP rs3817197 shows substantially weaker association with BP in our discovery data ( $P = 3 \times 10^{-4}$  for MAP, compared with  $P = 7 \times 10^{-10}$  for the index SNP,  $BF < 10^{-4}$ , see Table S13) such that the CNV-tSNP genotype (and therefore CNV genotype itself) cannot credibly explain the observed association at the LSP1/TNNT3 locus.



Table S12: Association results for previously reported SNPs.

| Publication <sup>a</sup> | Locus         | Reported SNP | Proxy <sup>b</sup> SNP( $r^2$ ) | $-N^{-c}$ cont./ HTN | Best <sup>d</sup> pheno | Best $P$ value        |
|--------------------------|---------------|--------------|---------------------------------|----------------------|-------------------------|-----------------------|
| Wang2008                 | STK39         | rs6749447    | —( 1 )                          | 17354/21000          | PP                      | 0.125                 |
| Org2009                  | CDH13         | rs11646213   | NA                              |                      |                         |                       |
| Newhouse2009             | WNK1          | rs765250     | rs6489752(0.67)                 | 22693/25050          | SBP                     | 0.328                 |
| Newhouse2009             | WNK1          | rs765250     | rs7980163(0.67)                 | 18969/21327          | SBP                     | 0.082                 |
| Newhouse2009             | WNK1          | rs765250     | rs10774464(0.59)                | 0/ 0                 |                         | NA                    |
| Newhouse2009             | WNK1          | rs765250     | rs10849559(0.57)                | 0/ 0                 |                         | NA                    |
| Cho2009                  | ATP2B1        | rs17249754   | rs11105354( 1 )                 | 22671/25029          | HTN                     | $2.41 \times 10^{-8}$ |
| NewtonCheh2009a          | NPPA/NPPB     | rs5068       | —( 1 )                          | 22663/25021          | DBP                     | $8.48 \times 10^{-5}$ |
| NewtonCheh2009a          | NPPA/NPPB     | rs5068       | rs17375901(0.87)                | 1988/ 1988           |                         | NA                    |
| NewtonCheh2009b          | MTHFR-NPPB    | rs17367504   | —( 1 )                          | 22672/25030          | DBP                     | $3.56 \times 10^{-6}$ |
| NewtonCheh2009b          | MTHFR-NPPB    | rs17367504   | rs17037390( 1 )                 | 22692/25049          | DBP                     | $3.71 \times 10^{-6}$ |
| NewtonCheh2009b          | MTHFR-NPPB    | rs17367504   | rs13306561(0.80)                | 22665/25023          | DBP                     | $3.24 \times 10^{-6}$ |
| NewtonCheh2009b          | MTHFR-NPPB    | rs17367504   | rs17037425(0.77)                | 22686/25044          | DBP                     | $1.22 \times 10^{-5}$ |
| NewtonCheh2009b          | MTHFR-NPPB    | rs17367504   | rs1537514(0.66)                 | 22688/25046          | DBP                     | $1.36 \times 10^{-4}$ |
| NewtonCheh2009b          | MTHFR-NPPB    | rs17367504   | rs17037396(0.66)                | 22688/25046          | DBP                     | $1.81 \times 10^{-4}$ |
| NewtonCheh2009b          | MTHFR-NPPB    | rs17367504   | rs2066470(0.66)                 | 22690/25048          | DBP                     | $7.74 \times 10^{-5}$ |
| NewtonCheh2009b          | MTHFR-NPPB    | rs17367504   | rs13306556(0.55)                | 22698/25056          | DBP                     | $1.27 \times 10^{-4}$ |
| NewtonCheh2009b          | MTHFR-NPPB    | rs17367504   | rs198358(0.55)                  | 22648/25006          | DBP                     | $6.36 \times 10^{-3}$ |
| NewtonCheh2009b          | CYP17A1-NT5C2 | rs11191548   | NA                              |                      |                         |                       |
| NewtonCheh2009b          | PLCD3         | rs12946454   | rs12603813(0.64)                | 0/ 0                 |                         | NA                    |
| NewtonCheh2009b          | FGF5          | rs16998073   | NA                              |                      |                         |                       |
| NewtonCheh2009b          | C10orf107     | rs1530440    | NA                              |                      |                         |                       |
| NewtonCheh2009b          | SH2B3         | rs653178     | rs3184504( 1 )                  | 17334/20981          | DBP                     | $6.98 \times 10^{-3}$ |
| NewtonCheh2009b          | CYP1A1-CSK    | rs1378942    | rs2472304(0.83)                 | 22663/25021          | SBP                     | 0.010                 |
| NewtonCheh2009b          | CYP1A1-CSK    | rs1378942    | rs7085(0.79)                    | 22691/25049          | PP                      | 0.024                 |
| NewtonCheh2009b          | CYP1A1-CSK    | rs1378942    | rs2472300(0.63)                 | 22669/25026          | SBP                     | 0.022                 |
| NewtonCheh2009b          | CYP1A1-CSK    | rs1378942    | rs762551(0.63)                  | 22687/25044          | SBP                     | 0.026                 |
| NewtonCheh2009b          | ZNF652        | rs16948048   | NA                              |                      |                         |                       |
| Levy2009                 | CYP17A1       | rs1004467    | rs3824755( 1 )                  | 22690/25047          | SBP                     | $3.84 \times 10^{-4}$ |
| Levy2009                 | PLEKHA7       | rs381815     | NA                              |                      |                         |                       |
| Levy2009                 | ATP2B1        | rs2681492    | rs11105354(0.92)                | 22671/25029          | HTN                     | $2.41 \times 10^{-8}$ |
| Levy2009                 | SH2B3         | rs3184504    | —( 1 )                          | 17334/20981          | DBP                     | $6.98 \times 10^{-3}$ |
| Levy2009                 | ULK4          | rs9815354    | NA                              |                      |                         |                       |
| Levy2009                 | CACNB2        | rs11014166   | NA                              |                      |                         |                       |
| Levy2009                 | ATP2B1        | rs2681472    | rs11105354( 1 )                 | 22671/25029          | HTN                     | $2.41 \times 10^{-8}$ |
| Levy2009                 | TBX3-TBX5     | rs2384550    | NA                              |                      |                         |                       |
| Levy2009                 | CSK-ULK3      | rs6495122    | NA                              |                      |                         |                       |
| Padmanabhan2010          | UMOD          | rs13333226   | —( 1 )                          | 22691/25049          | SBP                     | $1.39 \times 10^{-4}$ |
| Padmanabhan2010          | UMOD          | rs13333226   | rs11647727(0.65)                | 22688/25046          | MAP                     | $1.72 \times 10^{-4}$ |
| Padmanabhan2010          | UMOD          | rs13333226   | rs4297685(0.51)                 | 22657/25015          | DBP                     | $4.00 \times 10^{-4}$ |
| Takeuchi2010             | CASZ1         | rs880315     | NA                              |                      |                         |                       |
| Johnson2011              | ADRB1         | rs1801253    | —( 1 )                          | 22675/25031          | HTN                     | $2.85 \times 10^{-4}$ |
| Johnson2011              | ADRB1         | rs1801253    | rs7076938(0.93)                 | 22676/25034          | HTN                     | $2.72 \times 10^{-4}$ |
| Johnson2011              | AGT           | rs2004776    | —( 1 )                          | 22686/25042          | HTN                     | $4.28 \times 10^{-9}$ |
| Johnson2011              | AGT           | rs2004776    | rs6687360(0.66)                 | 22642/24998          | HTN                     | $9.09 \times 10^{-9}$ |
| Johnson2011              | AGT           | rs11122587   | rs2004776(0.56)                 | 22686/25042          | HTN                     | $4.28 \times 10^{-9}$ |
| Tomazewski2011           | MTHFR         | rs13306560   | —( 1 )                          | 22687/25045          | MAP                     | 0.027                 |
| Li2010                   | FURIN         | rs2071410    | —( 1 )                          | 17324/20962          | HTN                     | $1.04 \times 10^{-3}$ |
| Li2010                   | FURIN         | rs2071410    | rs6227( 1 )                     | 2009/ 2009           |                         | NA                    |
| Li2010                   | FURIN         | rs2071410    | rs4932370(0.86)                 | 22678/25036          | DBP                     | $5.41 \times 10^{-3}$ |

| Publication <sup>a</sup> | Locus            | Reported SNP | Proxy <sup>b</sup> SNP ( $r^2$ ) | $-N$ <sup>c</sup> cont./ HTN | Best <sup>d</sup> pheno | Best $P$ value        |
|--------------------------|------------------|--------------|----------------------------------|------------------------------|-------------------------|-----------------------|
| Li2010                   | FURIN            | rs2071410    | rs4932178(0.84)                  | 22665/25023                  | DBP                     | $5.33 \times 10^{-3}$ |
| Li2010                   | FURIN            | rs2071410    | rs4932371(0.80)                  | 22662/25020                  | DBP                     | $3.78 \times 10^{-3}$ |
| Ho2011                   | BLK-GATA4        | rs2898290    | rs9329221(0.57)                  | 22663/25020                  | HTN                     | 0.010                 |
| Ho2011                   | BLK-GATA4        | rs2898290    | rs6999466(0.55)                  | 22676/25034                  | MAP                     | $5.91 \times 10^{-3}$ |
| Ho2011                   | BLK-GATA4        | rs2898290    | rs4433149(0.54)                  | 22667/25024                  | HTN                     | 0.013                 |
| Ho2011                   | BLK-GATA4        | rs2898290    | rs11249996(0.53)                 | 22623/24981                  | MAP                     | 0.022                 |
| Ho2011                   | BLK-GATA4        | rs2898290    | rs7005363(0.52)                  | 17344/20990                  | HTN                     | 0.026                 |
| Ho2011                   | BLK-GATA4        | rs2898290    | rs7459532(0.51)                  | 22678/25035                  | DBP                     | 0.018                 |
| Ho2011                   | BLK-GATA4        | rs2898290    | rs1986972(0.51)                  | 22685/25042                  | MAP                     | 0.015                 |
| Hong2011                 | AKAP13           | rs11638762   | rs745191(0.55)                   | 17353/20998                  | SBP                     | 0.224                 |
| Kato2011                 | ST7L-CAPZA1      | rs17030613   | rs3737136(0.95)                  | 22686/25043                  | MAP                     | 0.205                 |
| Kato2011                 | FIGN-GRB14       | rs16849225   | NA                               |                              |                         |                       |
| Kato2011                 | ENPEP            | rs6825911    | NA                               |                              |                         |                       |
| Kato2011                 | NPR3             | rs1173766    | rs1173743(0.85)                  | 22670/25025                  | HTN                     | $5.77 \times 10^{-3}$ |
| Kato2011                 | RPL6-ALDH2       | rs11066280   | NA                               |                              |                         |                       |
| Kato2011                 | TBX3             | rs35444      | NA                               |                              |                         |                       |
| Zhu2011                  | SUB1-NPR3        | rs7726475    | NA                               |                              |                         |                       |
| Ehret2011                | MTHFR-NPPB       | rs17367504   | —( 1 )                           | 22672/25030                  | DBP                     | $3.56 \times 10^{-6}$ |
| Ehret2011                | MTHFR-NPPB       | rs17367504   | rs17037390( 1 )                  | 22692/25049                  | DBP                     | $3.71 \times 10^{-6}$ |
| Ehret2011                | MTHFR-NPPB       | rs17367504   | rs13306561(0.80)                 | 22665/25023                  | DBP                     | $3.24 \times 10^{-6}$ |
| Ehret2011                | MTHFR-NPPB       | rs17367504   | rs17037425(0.77)                 | 22686/25044                  | DBP                     | $1.22 \times 10^{-5}$ |
| Ehret2011                | MTHFR-NPPB       | rs17367504   | rs1537514(0.66)                  | 22688/25046                  | DBP                     | $1.36 \times 10^{-4}$ |
| Ehret2011                | MTHFR-NPPB       | rs17367504   | rs17037396(0.66)                 | 22688/25046                  | DBP                     | $1.81 \times 10^{-4}$ |
| Ehret2011                | MTHFR-NPPB       | rs17367504   | rs2066470(0.66)                  | 22690/25048                  | DBP                     | $7.74 \times 10^{-5}$ |
| Ehret2011                | MTHFR-NPPB       | rs17367504   | rs13306556(0.55)                 | 22698/25056                  | DBP                     | $1.27 \times 10^{-4}$ |
| Ehret2011                | MTHFR-NPPB       | rs17367504   | rs198358(0.55)                   | 22648/25006                  | DBP                     | $6.36 \times 10^{-3}$ |
| Ehret2011                | MOV10            | rs2932538    | NA                               |                              |                         |                       |
| Ehret2011                | SLC4A7           | rs13082711   | NA                               |                              |                         |                       |
| Ehret2011                | ULK4             | rs3774372    | NA                               |                              |                         |                       |
| Ehret2011                | MECOM            | rs419076     | NA                               |                              |                         |                       |
| Ehret2011                | FGF5             | rs1458038    | NA                               |                              |                         |                       |
| Ehret2011                | SLC39A8          | rs13107325   | NA                               |                              |                         |                       |
| Ehret2011                | GUCY1A3-GUCY1B3  | rs13139571   | NA                               |                              |                         |                       |
| Ehret2011                | NPR3-C5orf23     | rs1173771    | rs1173743(0.76)                  | 22670/25025                  | HTN                     | $5.77 \times 10^{-3}$ |
| Ehret2011                | EBF1             | rs11953630   | NA                               |                              |                         |                       |
| Ehret2011                | HFE              | rs1799945    | —( 1 )                           | 22677/25034                  | DBP                     | $7.56 \times 10^{-6}$ |
| Ehret2011                | BAT2-BAT5        | rs805303     | rs805301(0.96)                   | 22675/25033                  | HTN                     | $5.44 \times 10^{-5}$ |
| Ehret2011                | BAT2-BAT5        | rs805303     | rs805304(0.69)                   | 22676/25034                  | HTN                     | $6.71 \times 10^{-4}$ |
| Ehret2011                | BAT2-BAT5        | rs805303     | rs7029(0.61)                     | 22669/25027                  | HTN                     | $3.05 \times 10^{-3}$ |
| Ehret2011                | BAT2-BAT5        | rs805303     | rs2763979(0.54)                  | 22643/25000                  | DBP                     | 0.012                 |
| Ehret2011                | CACNB2(5')       | rs4373814    | NA                               |                              |                         |                       |
| Ehret2011                | CACNB2(3')       | rs1813353    | NA                               |                              |                         |                       |
| Ehret2011                | C10orf107        | rs4590817    | NA                               |                              |                         |                       |
| Ehret2011                | PLCE1            | rs932764     | NA                               |                              |                         |                       |
| Ehret2011                | CYP17A1-NT5C2    | rs11191548   | NA                               |                              |                         |                       |
| Ehret2011                | ADM              | rs7129220    | NA                               |                              |                         |                       |
| Ehret2011                | PLEKHA7          | rs381815     | NA                               |                              |                         |                       |
| Ehret2011                | FLJ32810-TMEM133 | rs633185     | NA                               |                              |                         |                       |
| Ehret2011                | ATP2B1           | rs17249754   | rs11105354( 1 )                  | 22671/25029                  | HTN                     | $2.41 \times 10^{-8}$ |
| Ehret2011                | SH2B3            | rs3184504    | —( 1 )                           | 17334/20981                  | DBP                     | $6.98 \times 10^{-3}$ |
| Ehret2011                | TBX5-TBX3        | rs10850411   | NA                               |                              |                         |                       |
| Ehret2011                | CYP1A1-ULK3      | rs1378942    | rs2472304(0.83)                  | 22663/25021                  | SBP                     | $9.71 \times 10^{-3}$ |
| Ehret2011                | CYP1A1-ULK3      | rs1378942    | rs7085(0.79)                     | 22691/25049                  | PP                      | 0.024                 |
| Ehret2011                | CYP1A1-ULK3      | rs1378942    | rs2472300(0.63)                  | 22669/25026                  | SBP                     | 0.022                 |

| Publication <sup>a</sup> | Locus       | Reported<br>SNP | Proxy <sup>b</sup><br>SNP( $r^2$ ) | $-N$ <sup>c</sup><br>cont./ HTN | Best <sup>d</sup><br>pheno | Best<br>$P$ value     |
|--------------------------|-------------|-----------------|------------------------------------|---------------------------------|----------------------------|-----------------------|
| Ehret2011                | CYP1A1-ULK3 | rs1378942       | rs762551(0.63)                     | 22687/25044                     | SBP                        | 0.026                 |
| Ehret2011                | FURIN-FES   | rs2521501       | rs2071410(0.83)                    | 17324/20962                     | HTN                        | $1.04 \times 10^{-3}$ |
| Ehret2011                | FURIN-FES   | rs2521501       | rs6227(0.83)                       | 2009/ 2009                      | NA                         |                       |
| Ehret2011                | FURIN-FES   | rs2521501       | rs4932370(0.77)                    | 22678/25036                     | DBP                        | $5.41 \times 10^{-3}$ |
| Ehret2011                | FURIN-FES   | rs2521501       | rs4932178(0.75)                    | 22665/25023                     | DBP                        | $5.33 \times 10^{-3}$ |
| Ehret2011                | FURIN-FES   | rs2521501       | rs4932371(0.71)                    | 22662/25020                     | DBP                        | $3.78 \times 10^{-3}$ |
| Ehret2011                | GOSR2       | rs17608766      | NA                                 |                                 |                            |                       |
| Ehret2011                | ZNF652      | rs12940887      | NA                                 |                                 |                            |                       |
| Ehret2011                | JAG1        | rs1327235       | NA                                 |                                 |                            |                       |
| Ehret2011                | GNAS-EDN3   | rs6015450       | NA                                 |                                 |                            |                       |
| Wain2011                 | FIGN        | rs13002573      | NA                                 |                                 |                            |                       |
| Wain2011                 | FIGN        | rs1446468       | NA                                 |                                 |                            |                       |
| Wain2011                 | MAP4        | rs319690        | NA                                 |                                 |                            |                       |
| Wain2011                 | CHIC2       | rs871606        | NA                                 |                                 |                            |                       |
| Wain2011                 | NOV         | rs2071518       | NA                                 |                                 |                            |                       |
| Wain2011                 | PIK3CG      | rs17477177      | NA                                 |                                 |                            |                       |
| Wain2011                 | ADRB1       | rs2782980       | NA                                 |                                 |                            |                       |
| Wain2011                 | ADAMTS8     | rs11222084      | NA                                 |                                 |                            |                       |

Notes: **a.** We considered previously reported, distinct genetic variants robustly associated with BP (defined by us as  $P < 5 \times 10^{-8}$  in an analysis of multiple independent samples, either GWAS meta-analysis or discovery and followup data combined; main text references 4-15), and also for some genetic variants reported to be associated with BP in recent GWAS or candidate gene studies (Wang *et al.* 2008, Newhouse *et al.* 2009, Org *et al.* 2009, Li *et al.* 2010, Hong *et al.* 2011, Zhu *et al.* 2011). **b.** We determined whether the previously reported index SNP or any  $r^2 > 0.5$  proxy was present on the HumanCVD BeadChip. “—” means the reported SNP was itself genotyped (and hence  $r^2 = 1$ ), and “NA” means neither the reported SNP nor any  $r^2 > 0.5$  proxy was genotyped on the HumanCVD BeadChip. **c.** For genotyped SNPs and proxies, we report our discovery meta-analysis sample sizes (“ $N$  cont.” for continuous BP traits and “ $N$  HTN” for HTN). **d.** For SNPs where  $> 50\%$  of the total sample size was analysed, we report the most significantly associated phenotype “Best pheno” and corresponding association  $P$  value in our discovery dataset.

Table S13: Identification of credibly causal SNPs.

| SNP <sup>a</sup>        | $r^2$ | Function <sup>b</sup> | Alleles                                     |                | — Meta-analysis — <sup>c</sup> |                      | —Bayes Factor— <sup>d</sup> |                     |
|-------------------------|-------|-----------------------|---------------------------------------------|----------------|--------------------------------|----------------------|-----------------------------|---------------------|
|                         |       |                       | coded/<br>noncoded                          | Coded<br>freq. | $\hat{\beta}$ (SE )            | $P$ -value           | normal<br>prior             | $t$ -dist.<br>prior |
| <b>MTHFR-NPPB locus</b> |       |                       | <b>DBP; PROCARDIS excluded<sup>e</sup></b>  |                |                                |                      |                             |                     |
| *rs72640208             | 0.28  | TFBS                  |                                             |                | NA                             |                      |                             |                     |
| *rs11586659             | 0.48  | TFBS                  |                                             |                | NA                             |                      |                             |                     |
| *rs55867221             | 0.28  | TFBS                  |                                             |                | NA                             |                      |                             |                     |
| *rs2151654              | 0.28  | TFBS                  |                                             |                | NA                             |                      |                             |                     |
| *rs59375726             | 0.30  | TFBS                  |                                             |                | NA                             |                      |                             |                     |
| rs1537514               | 0.28  |                       | G/C                                         | 0.89           | 0.507 (0.163)                  | 0.0018               | 0.00                        | 0.00                |
| *rs4846049 <sup>f</sup> | 1     | TFBS                  | T/G                                         | 0.33           | -0.512 (0.106)                 | $1.5 \times 10^{-6}$ | 1                           | 1                   |
| *rs3818762              | 0.70  | TFBS                  | G/C                                         | 0.72           | 0.473 (0.110)                  | $1.6 \times 10^{-5}$ | 0.14                        | 0.16                |
| rs13306556              | 0.28  |                       | T/C                                         | 0.11           | -0.510 (0.163)                 | 0.0017               | 0.00                        | 0.00                |
| rs1476413               | 0.74  |                       | T/C                                         | 0.27           | -0.426 (0.111)                 | 0.00012              | 0.03                        | 0.03                |
| *rs1801131              | 0.90  | <i>MTHFR</i> E429A    | T/G                                         | 0.68           | 0.477 (0.107)                  | $8.4 \times 10^{-6}$ | 0.25                        | 0.27                |
| *rs12121543             | 0.65  |                       | C/A                                         | 0.75           | 0.476 (0.114)                  | $3.2 \times 10^{-5}$ | 0.08                        | 0.09                |
| rs1994798               | 0.53  |                       | G/A                                         | 0.41           | -0.351 (0.102)                 | 0.00056              | 0.01                        | 0.01                |
| rs17421511              | 0.30  | TFBS                  | G/A                                         | 0.83           | 0.256 (0.132)                  | 0.052                | 0.00                        | 0.00                |
| *rs45449597             | 0.30  | TFBS                  |                                             |                | NA                             |                      |                             |                     |
| *rs45608437             | 0.30  | TFBS                  |                                             |                | NA                             |                      |                             |                     |
| *rs4846052              | 0.55  | TFBS                  |                                             |                | NA                             |                      |                             |                     |
| rs17037388              | 0.40  | TFBS                  | G/A                                         | 0.16           | -0.53 (0.136)                  | $1.0 \times 10^{-4}$ | 0.02                        | 0.02                |
| *rs17421560             | 0.28  | TFBS                  |                                             |                | NA                             |                      |                             |                     |
| *rs45504202             | 0.30  | TFBS                  |                                             |                | NA                             |                      |                             |                     |
| rs13306553              | 0.28  |                       | G/A                                         | 0.11           | -0.507 (0.162)                 | 0.0017               | 0.00                        | 0.00                |
| rs17037390              | 0.40  |                       | G/A                                         | 0.84           | 0.55 (0.136)                   | $5.5 \times 10^{-5}$ | 0.04                        | 0.04                |
| rs17037396              | 0.28  |                       | T/C                                         | 0.11           | -0.497 (0.162)                 | 0.0022               | 0.00                        | 0.00                |
| rs17367504              | 0.40  | TFBS                  | G/A                                         | 0.16           | -0.557 (0.137)                 | $4.6 \times 10^{-5}$ | 0.04                        | 0.04                |
| rs2066470               | 0.28  | TFBS                  | G/A                                         | 0.89           | 0.534 (0.163)                  | 0.0011               | 0.00                        | 0.00                |
| *rs3753588              | 0.24  | TFBS                  |                                             |                | NA                             |                      |                             |                     |
| *rs3753584              | 0.35  | TFBS                  |                                             |                | NA                             |                      |                             |                     |
| *rs17367629             | 0.21  | TFBS                  |                                             |                | NA                             |                      |                             |                     |
| *rs3753582              | 0.24  | TFBS                  |                                             |                | NA                             |                      |                             |                     |
| rs13306561              | 0.35  | TFBS                  | G/A                                         | 0.16           | -0.557 (0.136)                 | $4.3 \times 10^{-5}$ | 0.04                        | 0.04                |
| rs17037425              | 0.28  |                       | G/A                                         | 0.85           | 0.537 (0.142)                  | 0.00016              | 0.02                        | 0.02                |
| *rs6669371              | 0.37  | TFBS                  |                                             |                | NA                             |                      |                             |                     |
| *rs1023252              | 0.73  | TFBS                  |                                             |                | NA                             |                      |                             |                     |
| rs17350396              | 0.3   |                       | G/A                                         | 0.17           | -0.27 (0.132)                  | 0.041                | 0.00                        | 0.00                |
| rs198375                | 0.35  |                       | T/C                                         | 0.6            | 0.395 (0.102)                  | 0.00011              | 0.03                        | 0.04                |
| rs198388                | 0.21  |                       | T/C                                         | 0.43           | -0.341 (0.101)                 | 0.00071              | 0.01                        | 0.01                |
| *rs198389               | 0.28  | TFBS                  |                                             |                | NA                             |                      |                             |                     |
| *rs6668659              | 0.45  |                       | T/G                                         | 0.65           | 0.446 (0.105)                  | $2.0 \times 10^{-5}$ | 0.13                        | 0.15                |
| <b>AGT locus</b>        |       |                       | <b>HTN; no studies excluded<sup>e</sup></b> |                |                                |                      |                             |                     |
| *rs2493126              | 0.54  | TFBS                  |                                             |                | NA                             |                      |                             |                     |
| *rs12059975             | 0.29  | TFBS                  |                                             |                | NA                             |                      |                             |                     |
| *rs66946803             | 0.29  | TFBS                  |                                             |                | NA                             |                      |                             |                     |
| *rs943580               | 0.56  |                       | G/A                                         | 0.40           | 0.116 (0.021)                  | $2.1 \times 10^{-8}$ | 0.40                        | 0.25                |
| rs11122573              | 0.33  | TFBS                  | T/C                                         | 0.08           | 0.110 (0.037)                  | 0.0026               | 0.00                        | 0.00                |
| *rs10864770             | 0.33  | TFBS                  |                                             |                | NA                             |                      |                             |                     |
| *rs10864771             | 0.33  | TFBS                  |                                             |                | NA                             |                      |                             |                     |
| rs11122575              | 0.33  |                       | G/A                                         | 0.08           | 0.112 (0.037)                  | 0.0023               | 0.00                        | 0.00                |
| rs2493132               | 0.22  | TFBS                  | T/C                                         | 0.71           | -0.070 (0.022)                 | 0.0017               | 0.00                        | 0.00                |

| SNP <sup>a</sup>           | $r^2$            | Function <sup>b</sup> | Alleles<br>coded/<br>noncoded               | Coded<br>freq. | — Meta-analysis — <sup>c</sup><br>$\hat{\beta}$ (SE ) | $P$ -value           | —Bayes Factor— <sup>d</sup><br>normal $t$ -dist.<br>prior prior |      |
|----------------------------|------------------|-----------------------|---------------------------------------------|----------------|-------------------------------------------------------|----------------------|-----------------------------------------------------------------|------|
| *rs3789669                 | 0.75             | TFBS                  |                                             |                | NA                                                    |                      |                                                                 |      |
| <b>AGT locus continued</b> |                  |                       | <b>HTN; no studies excluded<sup>e</sup></b> |                |                                                       |                      |                                                                 |      |
| rs3789670                  | 0.36             | TFBS                  | T/C                                         | 0.11           | 0.131 (0.032)                                         | $5.4 \times 10^{-5}$ | 0.00                                                            | 0.00 |
| *rs3789671                 | 0.83             | TFBS                  | T/G                                         | 0.19           | 0.135 (0.026)                                         | $1.1 \times 10^{-7}$ | 0.05                                                            | 0.05 |
| *rs2493133                 | 0.56             | TFBS                  |                                             |                | NA                                                    |                      |                                                                 |      |
| *rs2478543                 | 0.56             | TFBS                  | T/C                                         | 0.59           | -0.118 (0.021)                                        | $1.2 \times 10^{-8}$ | 0.65                                                            | 0.42 |
| *rs2478539                 | 0.56             | TFBS                  |                                             |                | NA                                                    |                      |                                                                 |      |
| *rs6687360                 | 0.68             | TFBS                  | T/C                                         | 0.36           | 0.122 (0.021)                                         | $8.2 \times 10^{-9}$ | 0.82                                                            | 0.58 |
| *rs699                     | 0.56             | AGT M268T             | G/A                                         | 0.41           | 0.118 (0.021)                                         | $1.1 \times 10^{-8}$ | 0.68                                                            | 0.44 |
| *rs2004776 <sup>f</sup>    | 1                |                       | T/C                                         | 0.24           | 0.139 (0.024)                                         | $4.0 \times 10^{-9}$ | 0.96                                                            | 1    |
| rs3889728                  | 0.32             |                       | T/C                                         | 0.25           | 0.074 (0.023)                                         | 0.0016               | 0.00                                                            | 0.00 |
| *rs2493134                 | 0.56             |                       | T/C                                         | 0.60           | -0.120 (0.021)                                        | $7.0 \times 10^{-9}$ | 1                                                               | 0.68 |
| *rs3827750                 | 0.36             | TFBS                  |                                             |                | NA                                                    |                      |                                                                 |      |
| *rs3789678                 | 0.36             | TFBS                  |                                             |                | NA                                                    |                      |                                                                 |      |
| *rs3789679                 | 0.36             | TFBS                  |                                             |                | NA                                                    |                      |                                                                 |      |
| *rs2148582                 | 0.52             | TFBS                  | G/A                                         | 0.40           | 0.117 (0.021)                                         | $1.6 \times 10^{-8}$ | 0.51                                                            | 0.33 |
| *rs5051                    | 0.58             | TFBS                  | T/C                                         | 0.40           | 0.116 (0.021)                                         | $2.3 \times 10^{-8}$ | 0.37                                                            | 0.23 |
| rs5049                     | 0.36             | TFBS                  | T/C                                         | 0.11           | 0.145 (0.032)                                         | $5.9 \times 10^{-6}$ | 0.00                                                            | 0.00 |
| rs5046                     | 0.36             | TFBS                  | G/A                                         | 0.89           | -0.146 (0.032)                                        | $5.2 \times 10^{-6}$ | 0.00                                                            | 0.00 |
| rs2071405                  | 0.36             |                       | T/C                                         | 0.11           | 0.145 (0.032)                                         | $5.7 \times 10^{-6}$ | 0.00                                                            | 0.00 |
| rs2071404                  | 0.36             |                       | C/A                                         | 0.89           | -0.145 (0.032)                                        | $6.0 \times 10^{-6}$ | 0.00                                                            | 0.00 |
| rs2493137                  | 0.23             |                       | T/C                                         | 0.70           | -0.064 (0.022)                                        | 0.0038               | 0.00                                                            | 0.00 |
| rs1977414                  | 0.28             |                       | T/C                                         | 0.27           | 0.107 (0.023)                                         | $2.4 \times 10^{-6}$ | 0.01                                                            | 0.00 |
| rs4028824                  | 0.39             |                       | G/A                                         | 0.90           | -0.075 (0.033)                                        | 0.024                | 0.00                                                            | 0.00 |
| *rs2493141                 | 0.74             | TFBS                  |                                             |                | NA                                                    |                      |                                                                 |      |
| *rs4847008                 | 0.67             | TFBS                  |                                             |                | NA                                                    |                      |                                                                 |      |
| *rs2478525                 | 0.54             | TFBS                  |                                             |                | NA                                                    |                      |                                                                 |      |
| <b>NPR3 locus</b>          |                  |                       | <b>SBP; no studies excluded<sup>e</sup></b> |                |                                                       |                      |                                                                 |      |
| *rs72740637                | 0.63             | TFBS                  |                                             |                | NA                                                    |                      |                                                                 |      |
| *rs1421811 <sup>f</sup>    | 1                |                       | G/C                                         | 0.39           | -0.668 (0.146)                                        | $4.8 \times 10^{-6}$ | 1                                                               | 1    |
| rs10057069                 | 0.61             |                       | T/C                                         | 0.73           | 0.499 (0.160)                                         | 0.0019               | 0.01                                                            | 0.03 |
| rs976576                   | 0.20             |                       | T/C                                         | 0.25           | 0.151 (0.163)                                         | 0.35                 | 0.00                                                            | 0.00 |
| <b>HFE locus</b>           |                  |                       | <b>DBP; no studies excluded<sup>e</sup></b> |                |                                                       |                      |                                                                 |      |
| *rs56027330                | 0.24             | SLC17A3 G201R,G279R   |                                             |                | NA                                                    |                      |                                                                 |      |
| *rs72834630                | 0.78             | TFBS                  |                                             |                | NA                                                    |                      |                                                                 |      |
| *rs72834647                | 0.85             | TFBS                  |                                             |                | NA                                                    |                      |                                                                 |      |
| *... <sup>g</sup>          | ... <sup>g</sup> | TFBS                  |                                             |                | NA                                                    |                      |                                                                 |      |
| *rs1799945 <sup>f</sup>    | 1                | HFE H40D,H63D         | G/C                                         | 0.15           | 0.616 (0.138)                                         | $7.6 \times 10^{-6}$ | 1                                                               | 1    |
| rs2071303                  | 0.27             |                       | T/C                                         | 0.66           | -0.139 (0.104)                                        | 0.18                 | 0                                                               | 0    |
| *rs198851                  | 0.85             | TFBS                  |                                             |                | NA                                                    |                      |                                                                 |      |
| *rs129128                  | 0.92             | TFBS                  |                                             |                | NA                                                    |                      |                                                                 |      |
| *rs41266821                | 0.32             | HIST1H4G V3A          |                                             |                | NA                                                    |                      |                                                                 |      |
| <b>NOS3 locus</b>          |                  |                       | <b>DBP; no studies excluded<sup>e</sup></b> |                |                                                       |                      |                                                                 |      |
| *rs3918226 <sup>f</sup>    | 1                | TFBS                  | T/C                                         | 0.08           | 0.826 (0.177)                                         | $2.9 \times 10^{-6}$ | 1                                                               | 1    |
| <b>LSP1/TNNT3 locus</b>    |                  |                       | <b>MAP; no studies excluded<sup>e</sup></b> |                |                                                       |                      |                                                                 |      |
| *rs7113809                 | 0.24             | TFBS                  |                                             |                | NA                                                    |                      |                                                                 |      |
| *rs10769814                | 0.25             | TFBS                  |                                             |                | NA                                                    |                      |                                                                 |      |
| *rs2137320                 | 0.34             | TFBS                  |                                             |                | NA                                                    |                      |                                                                 |      |
| *rs673791                  | 0.24             | TFBS                  |                                             |                | NA                                                    |                      |                                                                 |      |
| rs592373                   | 0.30             |                       | G/A                                         | 0.37           | -0.491 (0.110)                                        | $7.5 \times 10^{-6}$ | 0.00                                                            | 0.00 |
| rs2271439                  | 0.29             |                       | C/A                                         | 0.84           | -0.386 (0.143)                                        | 0.0069               | 0.00                                                            | 0.00 |
| *rs621679                  | 0.57             | LSP1 A38T,A100T       |                                             |                | NA <sup>h</sup>                                       |                      |                                                                 |      |

| SNP <sup>a</sup>                  | $r^2$ | Function <sup>b</sup> | Alleles                                              |                | — Meta-analysis — <sup>c</sup> |                       | — Bayes Factor — <sup>d</sup> |                     |
|-----------------------------------|-------|-----------------------|------------------------------------------------------|----------------|--------------------------------|-----------------------|-------------------------------|---------------------|
|                                   |       |                       | coded/<br>noncoded                                   | Coded<br>freq. | $\hat{\beta}$ (SE)             | $P$ -value            | normal<br>prior               | $t$ -dist.<br>prior |
| ★rs661348 <sup>f</sup>            | 1     |                       | T/C                                                  | 0.57           | -0.650 (0.105)                 | $7.0 \times 10^{-10}$ | 1                             | 1                   |
| <b>LSP1/TNNT3 locus continued</b> |       |                       | <b>MAP; no studies excluded<sup>e</sup></b>          |                |                                |                       |                               |                     |
| rs3817197                         | 0.35  |                       | G/A                                                  | 0.53           | -0.381 (0.106)                 | 0.00031               | 0.00                          | 0.00                |
| rs3817198                         | 0.31  |                       | T/C                                                  | 0.68           | 0.348 (0.114)                  | 0.0022                | 0.00                          | 0.00                |
| ★rs517101                         | 0.34  | TFBS                  |                                                      |                | NA                             |                       |                               |                     |
| ★rs542605                         | 0.30  | TFBS                  |                                                      |                | NA                             |                       |                               |                     |
| ★rs576603                         | 0.47  | TFBS                  |                                                      |                | NA                             |                       |                               |                     |
| ★rs810021                         | 0.50  | TFBS                  |                                                      |                | NA                             |                       |                               |                     |
| ★rs1092608                        | 0.25  | TFBS                  |                                                      |                | NA                             |                       |                               |                     |
| ★rs28971510                       | 0.23  | TFBS                  |                                                      |                | NA                             |                       |                               |                     |
| rs909116                          | 0.37  |                       | T/C                                                  | 0.52           | -0.393 (0.105)                 | 0.00018               | 0.00                          | 0.00                |
| <b>SOX6 locus</b>                 |       |                       | <b>MAP; AIBIII+ASCOT+BRIGHT excluded<sup>e</sup></b> |                |                                |                       |                               |                     |
| ★rs2351958                        | 0.32  | TFBS                  |                                                      |                | NA                             |                       |                               |                     |
| ★rs16932862                       | 0.96  |                       | T/C                                                  | 0.20           | 0.429 (0.154)                  | 0.0054                | 0.75                          | 0.79                |
| ★rs12799126                       | 0.96  |                       | T/G                                                  | 0.20           | 0.413 (0.154)                  | 0.0073                | 0.62                          | 0.67                |
| ★rs1401455                        | 0.96  |                       | T/C                                                  | 0.80           | -0.420 (0.153)                 | 0.0061                | 0.69                          | 0.74                |
| ★rs1155685                        | 0.96  | TFBS                  |                                                      |                | NA                             |                       |                               |                     |
| ★rs7101502                        | 0.87  | TFBS                  |                                                      |                | NA                             |                       |                               |                     |
| ★rs297346                         | 0.22  |                       | G/A                                                  | 0.64           | 0.219 (0.129)                  | 0.090                 | 0.12                          | 0.21                |
| ★rs2014408 <sup>f</sup>           | 1     |                       | T/C                                                  | 0.21           | 0.443 (0.152)                  | 0.0036                | 1                             | 1                   |
| <b>ATP2B1 locus</b>               |       |                       | <b>HTN; no studies excluded<sup>e</sup></b>          |                |                                |                       |                               |                     |
| ★rs11105273                       | 0.23  | TFBS                  |                                                      |                | NA                             |                       |                               |                     |
| ★rs11105310                       | 0.45  | TFBS                  |                                                      |                | NA                             |                       |                               |                     |
| ★rs10777184                       | 0.45  | TFBS                  |                                                      |                | NA                             |                       |                               |                     |
| ★rs10858896                       | 0.45  | TFBS                  |                                                      |                | NA                             |                       |                               |                     |
| ★rs10858899                       | 0.45  | TFBS                  |                                                      |                | NA                             |                       |                               |                     |
| ★rs11105319                       | 0.45  | TFBS                  |                                                      |                | NA                             |                       |                               |                     |
| ★rs10858906                       | 0.45  | TFBS                  |                                                      |                | NA                             |                       |                               |                     |
| ★rs2681492                        | 0.91  | TFBS                  |                                                      |                | NA                             |                       |                               |                     |
| ★rs11105354 <sup>f</sup>          | 1     |                       | G/A                                                  | 0.16           | -0.155 (0.028)                 | $2.2 \times 10^{-8}$  | 1                             | 1                   |
| ★rs2280715                        | 0.22  | TFBS                  |                                                      |                | NA                             |                       |                               |                     |

Notes: **a.** For the eight significantly associated index SNPs in our combined discovery and followup analysis ( $P < 8.56 \times 10^{-7}$ ; Table S9), we used 120 phased CEU haplotypes at approx. 6.9M called SNPs from the June 2010 early release of resequencing data from the 1000 Genomes Project Consortium (2010) to non-stringently identify all SNPs in pairwise LD at  $r^2 > 0.2$  with each index SNP. SNPs inferred to be credibly causal are annotated with a star (\*). **b.** We defined as potentially functional any SNP that was not annotated only as “--”, “intrinsic”, “UTR”, “non-coding”, or encoding a synonymous amino acid substitution with respect to known transcripts. In addition, we defined as potentially functional all SNPs within transcription factor binding site (TFBS) peak regions defined by the ENCODE project for a set of 55 transcription factors (The ENCODE Project Consortium 2007, Raney *et al.* 2010), which are listed in detail in Table S15. Here we present data for only 159 of 860 such SNPs, which are (i) SNPs for which we have association data (regardless of functional annotation), plus (ii) SNPs that are potentially functional (regardless of whether we have association data). **c.** NA indicates association meta-analysis not available because the SNP was not genotyped on the HumanCVD BeadArray or failed QC in  $> 50\%$  of total sample size.

See following page for notes **d.–h.**

Table S13 notes continued: **d.** We calculated marginal likelihoods assuming a prospective regression model, and following Wakefield (2009) we used a large sample normal approximation to the likelihood function,  $\hat{\beta} \sim \mathcal{N}(\beta, \text{SE}^2)$ , where  $\hat{\beta}$  is the effect size estimate (for the phenotype most significantly associated with the index SNP),  $\beta$  is the true effect size, and SE is the standard error (assumed known and fixed). Wakefield (2009) derived closed form expressions for the marginal likelihood, assuming a normal prior for  $\beta$ . However, a normal prior may not be sufficiently heavy tailed in the sense that it cannot simultaneously allow a high prior density near zero, a small prior mean effect size, and a flatness in the tails that allows data strongly supporting a large effect size to dominate the prior (Hoggart *et al.* 2008, Stephens and Balding 2009). We therefore computed results for two different priors: A normal prior where  $\beta \sim \mathcal{N}(0, W)$  as assumed by Wakefield (2009), and a heavy tailed prior where  $\beta$  was t-distributed with 1 d.f. and scale chosen such that the central 80% probability interval was the same as the normal prior. We chose prior variance  $W = (0.25\text{mmHg})^2$  for continuous traits, and  $W = (0.05)^2$  on a  $\ln(\text{odds})$  scale for dichotomous hypertension. These priors were motivated by an assumption that associations discovered previously (Levy *et al.* 2009, Newton-Cheh *et al.* 2009) were in the tails of the distribution of effect sizes for all truly associated SNPs, the observation that studies powered for OR around 1.2 did not discover loci for hypertension (Wellcome Trust Case Control Consortium 2007), and that effect sizes scale approximately like  $0.2 \ln(\text{odds})$  per mmHg for previously discovered loci (Newton-Cheh *et al.* 2009). **e.** We analysed the primary BP trait for the index SNP at each locus (Table S7). For model comparison, a fixed set of observed data are necessary. Because all studies filtered at call rate  $\geq 98\%$ , for practical purposes this means a fixed set of studies must be used to compare support for different SNPs at each locus. Meta-analysis results reported here therefore exclude (on a locus-by-locus basis) studies that fail SNP QC for any SNPs that (i) were in  $r^2 \geq 0.8$  with the index SNP and (ii) pass QC for  $\geq 50\%$  of total sample size. **f.** Index SNP at each locus. **g.** 33 SNPs (rs2032444, rs198855, rs198823, rs11755618, rs11751062, rs41266811, chr6:26325824, chr6:26332322, chr6:26332356, chr6:26332382, chr6:26340330, rs16891464, chr6:26348453, rs3734534, rs11751286, chr6:26358008, chr6:26358012, rs11753610, rs11759682, rs3823157, rs11754168, chr6:26392649, rs41266829, rs41266831, chr6:26394705, chr6:26394727, rs11756428, rs57145038, rs34434694, rs73399394, rs11754384, rs6938696, rs73401236, rs61213538, rs61625476) in modest LD ( $0.24 \leq r^2 \leq 0.47$ ) with index SNP. **h.** See Table S14 for association results from directly genotyping this SNP in the BRIGHT case and control samples.

Table S14: *LSP1* p.[Ala38Thr, Ala100Thr] non-synonymous SNP.

| SNP                   | Alleles<br>coded/<br>noncoded | -Single SNP analysis <sup>-a</sup> |                                    | -Multiple SNP analysis <sup>-a</sup> |                    | -Pairwise LD ( $r^2$ ) <sup>-a</sup><br>rs621679 |
|-----------------------|-------------------------------|------------------------------------|------------------------------------|--------------------------------------|--------------------|--------------------------------------------------|
|                       |                               | $\beta_{\text{SNP}}$ ( SE)         | $P$ -value                         | $\beta_{\text{SNP}}$ ( SE)           | $P$ -value         |                                                  |
| rs661348              | T/C                           | -1.551 (0.495)                     | $1.76 \times 10^{-3}$              | -0.891 (0.710)                       | 0.209 <sup>b</sup> | 0.513                                            |
| rs621679 <sup>c</sup> | G/A <sup>d</sup>              | -1.531 (0.486)                     | $1.66 \times 10^{-3}$ <sup>e</sup> | -0.904 (0.697)                       | 0.194 <sup>b</sup> |                                                  |

Notes: **a.** Association with MAP, and pairwise LD, estimated using data on 3108 individuals from BRIGHT (1475 cases and 1633 controls) that were successfully genotyped for both SNPs. **b.** Neither SNP is significantly associated when added to a multivariate regression model that includes the other SNP. **c.** rs621679 genotyped using a KASPAR assay with call rate 97% and Hardy–Weinberg  $P = 1.5 \times 10^{-5}$ . Despite significant heterozygote deficit we infer the genotype calls are mostly correct because of the observed correlation with rs661348 matches the correlation in 1000G data. **d.** G/A alleles at nsSNP rs621679 correspond respectively to Ala/Thr residues, at either position 38 or position 100 depending on the *LSP1* transcript. This amino acid substitution is predicted to be benign by PolyPhen (Ramensky *et al.* 2002). **e.** The nsSNP rs621679 shows only slightly stronger association and therefore it is not surprising that both SNPs are credibly causal. Using the same approach as for Table S13 we obtain a BF for rs661348 vs rs621679 of 0.96 for the normal prior and 0.97 for the t-distribution prior.



Table S15: Individual TFBS containing credibly causal SNPs.

| TFBS peak region <sup>a</sup> | Names <sup>b</sup> (scores <sup>c</sup> )                                                                               | Credibly causal SNPs (BF if not NA) <sup>d</sup>                    |
|-------------------------------|-------------------------------------------------------------------------------------------------------------------------|---------------------------------------------------------------------|
| <b>MTHFR-NPPB locus</b>       |                                                                                                                         |                                                                     |
| chr1:11760–11761kb            | HNF4A (1000)                                                                                                            | rs72640208                                                          |
| chr1:11767–11768kb            | BAF155 (767)                                                                                                            | rs11586659, rs55867221, rs2151654, rs59375726                       |
| chr1:11768–11768kb            | BAF170 (1000)                                                                                                           | rs11586659, rs55867221                                              |
| chr1:11772–11774kb            | STAT1 (1000) <sup>e</sup>                                                                                               | rs4846049 (1.00), rs3818762 (0.16)                                  |
| chr1:11773–11774kb            | BAF155 (531), BAF170 (556)                                                                                              | rs3818762 (0.16)                                                    |
| chr1:11774–11774kb            | c-Fos (510)                                                                                                             | rs3818762 (0.16)                                                    |
| chr1:11780–11781kb            | Brg1 (614), PU.1 (1000)                                                                                                 | rs45449597, rs45608437, rs4846052, rs17421560, rs45504202           |
| chr1:11781–11782kb            | Max (1000)                                                                                                              | rs45504202                                                          |
| chr1:11786–11787kb            | BAF155 (682), HEY1 (1000), BAF170 (603)                                                                                 | rs3753588                                                           |
| chr1:11787–11789kb            | HEY1 (1000)                                                                                                             | rs3753584, rs17367629, rs3753582                                    |
| chr1:11788–11790kb            | Max (1000)                                                                                                              | rs17367629, rs3753582                                               |
| chr1:11788–11789kb            | TAF1 (1000), BAF155 (648), BAF170 (850), SREBP1 (1000), FOSL2 (1000), GABP (886), JunD (1000), p300 (1000), c-Fos (581) | rs17367629, rs3753582                                               |
| chr1:11804–11805kb            | c-Jun (783)                                                                                                             | rs6669371                                                           |
| chr1:11821–11822kb            | Rad21 (618), CTCF (1000)                                                                                                | rs1023252                                                           |
| chr1:11841–11843kb            | NRSF (1000)                                                                                                             | rs198389                                                            |
| chr1:11842–11842kb            | Ini1 (734)                                                                                                              | rs198389                                                            |
| <b>AGT locus</b>              |                                                                                                                         |                                                                     |
| chr1:228897–228898kb          | FOSL2 (879)                                                                                                             | rs2493126, rs12059975, rs66946803                                   |
| chr1:228904–228907kb          | FOSL2 (1000)                                                                                                            | rs10864770, rs10864771                                              |
| chr1:228910–228911kb          | HEY1 (1000)                                                                                                             | rs3789669, rs3789671 (0.05), rs2493133, rs2478543 (0.65), rs2478539 |
| chr1:228911–228912kb          | BAF155 (662), CEBPB (505), RXRA (695)                                                                                   | rs2493133, rs2478543 (0.65), rs2478539, rs6687360 (0.82)            |
| chr1:228911–228911kb          | p300 (1000), BHLHE40 (629)                                                                                              | rs2478543 (0.65)                                                    |
| chr1:228916–228917kb          | TAF1 (512), JunD (1000), Sin3Ak-20 (822), FOSL2 (520), p300 (1000), RXRA (1000), BAF170 (758)                           | rs3827750, rs3789678, rs3789679, rs2148582 (0.51), rs5051 (0.37)    |
| chr1:228931–228932kb          | HNF4A (789)                                                                                                             | rs2493141, rs4847008, rs2478525                                     |
| <b>NPR3 locus</b>             |                                                                                                                         |                                                                     |
| chr5:32746–32746kb            | BAF170 (517)                                                                                                            | rs72740637                                                          |
| chr5:32746–32747kb            | BAF155 (542)                                                                                                            | rs72740637                                                          |
| <b>HFE locus</b>              |                                                                                                                         |                                                                     |
| chr6:26133–26136kb            | HEY1 (1000)                                                                                                             | rs72834630                                                          |
| chr6:26151–26155kb            | HEY1 (1000)                                                                                                             | rs72834647, rs2032444                                               |
| chr6:26151–26153kb            | POU2F2 (1000)                                                                                                           | rs72834647                                                          |
| chr6:26211–26213kb            | JunD (1000)                                                                                                             | rs198855, rs198851                                                  |
| chr6:26212–26214kb            | HEY1 (1000)                                                                                                             | rs198851                                                            |
| chr6:26212–26213kb            | RXRA (629), POU2F2 (1000), PAX5-N19 (628)                                                                               | rs198851                                                            |
| chr6:26230–26236kb            | HEY1 (1000)                                                                                                             | rs198823, rs129128                                                  |
| chr6:26231–26233kb            | TAF1 (1000)                                                                                                             | rs198823                                                            |
| chr6:26322–26326kb            | HEY1 (1000)                                                                                                             | rs11755618, rs11751062, rs41266811, chr6:26325824                   |

| TFBS peak region <sup>a</sup> | Names <sup>b</sup> (scores <sup>c</sup> )                                                                                                                         | Credibly causal SNPs (BF if not NA) <sup>d</sup>     |
|-------------------------------|-------------------------------------------------------------------------------------------------------------------------------------------------------------------|------------------------------------------------------|
| chr6:26324–26326kb            | POU2F2 (1000), TAF1 (1000)                                                                                                                                        | rs11755618, rs11751062, rs41266811, chr6:26325824    |
| chr6:26324–26324kb            | PAX5-C20 (1000)                                                                                                                                                   | rs11755618, rs11751062                               |
| chr6:26324–26325kb            | PAX5-N19 (1000), PAX5-C20 (614), BCL3 (694)                                                                                                                       | rs41266811                                           |
| chr6:26325–26325kb            | SP1 (1000), TCF12 (1000), IRF4 (583)                                                                                                                              | rs41266811                                           |
| chr6:26332–26333kb            | HEY1 (634), TAF1 (936)                                                                                                                                            | chr6:26332322, chr6:26332356, chr6:26332382          |
| chr6:26340–26343kb            | HEY1 (1000)                                                                                                                                                       | chr6:26340330, rs16891464                            |
| chr6:26341–26343kb            | POU2F2 (1000), BCL3 (1000)                                                                                                                                        | rs16891464                                           |
| chr6:26341–26344kb            | TAF1 (1000)                                                                                                                                                       | rs16891464                                           |
| chr6:26342–26343kb            | ZBTB33 (1000)                                                                                                                                                     | rs16891464                                           |
| chr6:26348–26350kb            | POU2F2 (1000), TAF1 (1000)                                                                                                                                        | chr6:26348453, rs3734534, rs11751286                 |
| chr6:26349–26350kb            | PAX5-N19 (1000), PAX5-C20 (1000)                                                                                                                                  | rs11751286                                           |
| chr6:26358–26359kb            | HEY1 (1000), POU2F2 (1000), PAX5-N19 (502), Pbx3 (927), TAF1 (1000), BCL3 (795)                                                                                   | chr6:26358008, chr6:26358012                         |
| chr6:26359–26360kb            | SP1 (522)                                                                                                                                                         | rs11753610                                           |
| chr6:26360–26360kb            | c-Fos (536), TAF1 (1000)                                                                                                                                          | rs11753610                                           |
| chr6:26378–26380kb            | POU2F2 (1000), BCL11A (659), Pbx3 (604)                                                                                                                           | rs11759682                                           |
| chr6:26379–26380kb            | TAF1 (1000), c-Fos (607)                                                                                                                                          | rs3823157                                            |
| chr6:26392–26394kb            | HEY1 (1000)                                                                                                                                                       | rs11754168, chr6:26392649, rs41266829, rs41266831    |
| chr6:26393–26394kb            | POU2F2 (1000), TAF1 (1000), JunD (933), IRF4 (541), SP1 (547), Pbx3 (591), PAX5-N19 (1000), TCF12 (575), p300 (932), NRSF (911), Sin3Ak-20 (851), PAX5-C20 (1000) | rs41266829, rs41266831                               |
| chr6:26393–26395kb            | c-Myc (561)                                                                                                                                                       | rs41266829, rs41266831, chr6:26394705, chr6:26394727 |
| chr6:26395–26395kb            | HSF1 (1000), CEBPB (616)                                                                                                                                          | chr6:26394705, chr6:26394727                         |
| chr6:26413–26413kb            | BAF155 (553)                                                                                                                                                      | rs11756428                                           |
| chr6:26419–26420kb            | HSF1 (583)                                                                                                                                                        | rs57145038                                           |
| chr6:26428–26428kb            | PU.1 (1000)                                                                                                                                                       | rs34434694                                           |
| chr6:26430–26431kb            | Max (782)                                                                                                                                                         | rs73399394, rs11754384                               |
| chr6:26431–26431kb            | USF-1 (1000), BAF170 (624)                                                                                                                                        | rs11754384                                           |
| chr6:26436–26437kb            | HSF1 (1000), CEBPB (552), Pol3 (699)                                                                                                                              | rs6938696                                            |
| chr6:26436–26436kb            | BAF170 (525)                                                                                                                                                      | rs6938696                                            |
| chr6:26440–26440kb            | Ini1 (815)                                                                                                                                                        | rs73401236                                           |
| chr6:26445–26446kb            | BAF155 (649)                                                                                                                                                      | rs61213538, rs61625476                               |
| chr6:26445–26445kb            | Brg1 (514)                                                                                                                                                        | rs61213538, rs61625476                               |
| <b>NOS3 locus</b>             |                                                                                                                                                                   |                                                      |
| chr7:150321–150321kb          | SIX5 (1000) <sup>e</sup>                                                                                                                                          | rs3918226 (1)                                        |
| <b>LSP1/TNNT3 locus</b>       |                                                                                                                                                                   |                                                      |
| chr11:1830–1834kb             | NFKB (653)                                                                                                                                                        | rs7113809, rs10769814                                |
| chr11:1830–1833kb             | POU2F2 (1000)                                                                                                                                                     | rs7113809                                            |
| chr11:1841–1841kb             | BAF155 (1000), Ini1 (588)                                                                                                                                         | rs2137320                                            |
| chr11:1841–1842kb             | BAF155 (1000), Max (514), c-Jun (511), Ini1 (1000)                                                                                                                | rs673791                                             |
| chr11:1868–1869kb             | POU2F2 (993)                                                                                                                                                      | rs517101, rs542605                                   |
| chr11:1869–1869kb             | BCL3 (989)                                                                                                                                                        | rs542605                                             |
| chr11:1870–1871kb             | BCL3 (935)                                                                                                                                                        | rs576603                                             |

| TFBS peak region <sup>a</sup> | Names <sup>b</sup> (scores <sup>c</sup> )                                    | Credibly causal SNPs (BF if not NA) <sup>d</sup> |
|-------------------------------|------------------------------------------------------------------------------|--------------------------------------------------|
| chr11:1871–1872kb             | BCL3 (924)                                                                   | rs810021, rs1092608, rs28971510                  |
| <b>SOX6 locus</b>             |                                                                              |                                                  |
| chr11:16204–16205kb           | GR (1000)                                                                    | rs2351958                                        |
| chr11:16271–16272kb           | Ini1 (573), Brg1 (601)                                                       | rs1155685                                        |
| chr11:16305–16305kb           | Ini1 (946), Brg1 (1000)                                                      | rs7101502                                        |
| <b>ATP2B1 locus</b>           |                                                                              |                                                  |
| chr12:88311–88312kb           | Brg1 (768), Ini1 (657)                                                       | rs11105273                                       |
| chr12:88442–88444kb           | Ini1 (552), BAF155 (584)                                                     | rs11105310, rs10777184, rs10858896               |
| chr12:88442–88443kb           | BAF170 (596)                                                                 | rs11105310                                       |
| chr12:88443–88443kb           | CTCF (508)                                                                   | rs11105310                                       |
| chr12:88444–88444kb           | SRF (859), SP1 (1000)                                                        | rs10777184, rs10858896                           |
| chr12:88448–88448kb           | Rad21 (704), CTCF (956)                                                      | rs10858899                                       |
| chr12:88451–88452kb           | NRSF (1000)                                                                  | rs11105319                                       |
| chr12:88451–88451kb           | BAF170 (599)                                                                 | rs11105319                                       |
| chr12:88458–88459kb           | Brg1 (691)                                                                   | rs10858906                                       |
| chr12:88459–88459kb           | GR (658)                                                                     | rs10858906                                       |
| chr12:88537–88537kb           | c-Jun (575), c-Fos (723)                                                     | rs2681492                                        |
| chr12:88625–88628kb           | Max (543), BAF155 (727)                                                      | rs2280715                                        |
| chr12:88625–88629kb           | Ini1 (745)                                                                   | rs2280715                                        |
| chr12:88626–88628kb           | TAF1 (1000), HEY1 (1000)                                                     | rs2280715                                        |
| chr12:88627–88628kb           | TCF12 (1000), PAX5-C20 (1000),<br>SP1 (1000), PAX5-N19 (1000), Brg1<br>(570) | rs2280715                                        |

Notes: **a.** Transcription factor binding site (TFBS) peak region start and stop coordinates were rounded to the nearest kilobase before condensing identical regions into single table rows. **b.** Name of the antibody to a target transcription factor (from a set of 55; using the ENCODE controlled vocabulary) used in ChIP-Seq experiment data reported by the ENCODE consortium (The ENCODE Project Consortium 2007, Raney *et al.* 2010). **c.** Only TFBS peak regions with an ENCODE-defined score  $\geq 500$  are reported here. The score combines peaks called from processed data from multiple cell lines and experimental conditions into an overall measure of support for the region, on a 0–1000 scale. To approximately calibrate the observed overlap between these TFBS peak regions and BP associated SNPs, we noted that of all 38,122 SNPs on the HumanCVD BeadChip for which we had association test statistics with  $\geq 50\%$  of our full sample size, only 3445 SNPs (9.04% of the total) occur within ENCODE defined TFBS peak regions with score  $\geq 500$ . **d.** Credibly causal SNPs either have no association data and are in  $r^2 > 0.2$  with the index SNP, or have association data and Bayes Factor BF  $> 0.05$ . Here we report the maximum of the BF from the normal prior and the  $t$ -distribution prior, see Table S13 for details. **e.** After identifying which of our credibly causal SNPs were within ENCODE defined TFBS peak regions, we examined the raw (aligned read density) signal data from the underlying ChIP-Seq experiments (Johnson *et al.* 2007, Rozowsky *et al.* 2009), to confirm the signal strength relative to control experiments, and to determine more precisely the position of the SNPs relative to the signal peak. Figure S13 illustrates two TFBS peak regions where the underlying raw data showed striking enrichment of aligned read density near our BP associated SNPs. For some other ENCODE defined TFBS we were not able to identify such visually clear signal enrichment by simply plotting the underlying raw signal data, and further analyses using more sophisticated normalization and peak identification algorithms (Valouev *et al.* 2008, Zhang *et al.* 2008, Rozowsky *et al.* 2009) are required to confirm the evidence for each TFBS along with their precise locations relative to the BP-associated SNPs.

Table S16: eSNP analyses in monocytes and the whole blood and tissue panel.

| Locus      | Index SNP <sup>a</sup> ( $r^2$ ) | Tissue                      | Transcript <sup>b</sup>           | — Index SNP<br>P-value | — Top eSNP <sup>c</sup> ( $r^2$ ) | — Top eSNP<br>P-value  | —<br>P adj. <sup>e</sup> |
|------------|----------------------------------|-----------------------------|-----------------------------------|------------------------|-----------------------------------|------------------------|--------------------------|
| MTHFR-NPPB | rs1801131                        | (0.93) monocytes            | <i>MTHFR</i> (-) <sup>f</sup>     | $3.1 \times 10^{-36}$  | rs1476413 (0.73)                  | $1.7 \times 10^{-45}$  | $1.9 \times 10^{-11}$    |
| MTHFR-NPPB | rs4846049                        | ( $\equiv 1$ ) blood/tissue | <i>MTHFR</i> (-) <sup>f</sup>     | $1.9 \times 10^{-82}$  | rs3818762 (0.69)                  | $3.2 \times 10^{-99}$  | $1.4 \times 10^{-6}$     |
| MTHFR-NPPB | rs4846049                        | ( $\equiv 1$ ) blood        | <i>MTHFR</i> (-) <sup>f</sup>     | $2.9 \times 10^{-19}$  | rs3818762 (0.69)                  | $1.3 \times 10^{-25}$  | 0.021                    |
| MTHFR-NPPB | rs4846049                        | ( $\equiv 1$ ) blood/tissue | <i>CLCN6</i> (-) <sup>f</sup>     | $1.6 \times 10^{-8}$   | rs3818762 (0.69)                  | $8.8 \times 10^{-15}$  | $5.1 \times 10^{-10}$    |
| HFE        | rs129128                         | (1.00) monocytes            | <i>HIST1H2BK</i> (+) <sup>g</sup> | $8.5 \times 10^{-5}$   | $\equiv 1$                        | $8.5 \times 10^{-5}$   | NA                       |
| HFE        | rs1799945                        | ( $\equiv 1$ ) blood/tissue | <i>HIST1H2AA</i> (+) <sup>g</sup> | $2.9 \times 10^{-4}$   | rs129128 (1.00)                   | $8.1 \times 10^{-5}$   | 0.61                     |
| ATP2B1     | rs2681472                        | (1.00) monocytes            | <i>GALNT4</i> (+) <sup>h</sup>    | $2.3 \times 10^{-11}$  | rs3958726 (0.09)                  | $6.4 \times 10^{-171}$ | $2.7 \times 10^{-160}$   |

Notes: **a.** Association between transcript levels and SNP genotypes was tested in monocytes for 6 index SNPs (the SNPs most significantly associated with BP, or where available  $r^2 \geq 0.9$  proxies for the SNPs most significantly associated with BP), and in the whole blood and tissue panel for 8 index SNPs (the SNPs most significantly associated with BP at 8 loci, indicated by  $r^2 \equiv 1$  because proxies were not used). **b.** We report the transcripts significantly associated with index SNPs, as described in Table S3, along with a (+) or (-) symbol according to whether the index SNP allele associated with higher blood pressure is associated with higher or lower transcript level. **c.** To determine whether the BP and transcript association signals were coincident, we followed the approach of Voight *et al.* (2010). We first identified the top eSNP for each transcript (the SNP with the most significant *cis*- association for the transcript) and report the pairwise LD ( $r^2$ ) between the top eSNP and the index SNP, writing  $r^2 \equiv 1$  when they are the same SNP. When the index SNP and the top eSNP are not the same, two conditional analyses were then performed: **d.** Association between transcript level and index SNP genotype, including the top eSNP genotype as a covariate; **e.** Association between transcript level and top eSNP genotype, including the index SNP genotype as a covariate. We interpret the results of these conditional analyses as follows: **f.** The BP and transcript association signals for the *MTHFR* and *CLCN6* transcripts are coincident: The index SNPs tag top eSNPs that are more strongly associated with transcript levels, with both conditional analyses showing attenuated significance and  $P$  adj.<sup>e</sup> more significant. The top eSNP rs3818762 shows similar strength of association with BP as the index SNP (Table S13). **g.** The BP and transcript association signals for the *HIST1H2BK* and *HIST1H2AA* transcripts are perfectly coincident: For *HIST1H2BK* the SNPs are the same ( $r^2 \equiv 1$ ) and hence no conditional analyses were performed, and for *HIST1H2AA* either perfectly tags the other and hence both conditional analyses are non-significant. **h.** The BP and transcript association signals for the *GALNT4* transcripts are not coincident: The index SNP is a poor tag for the much-more-significantly-associated top eSNP.

Table S17: **MTHFR-NPPB locus conditional analysis.**

| SNP <sup>a</sup> | alleles<br>coded/<br>noncoded | -Single SNP analyses- <sup>b</sup>       |                        | -Multiple SNP analyses- <sup>b</sup>     |                        | -Pairwise LD ( $r^2$ )- |        |
|------------------|-------------------------------|------------------------------------------|------------------------|------------------------------------------|------------------------|-------------------------|--------|
|                  |                               | $\beta_{\text{SNP}}$ ( SE <sup>c</sup> ) | $P$ value <sup>c</sup> | $\beta_{\text{SNP}}$ ( SE <sup>c</sup> ) | $P$ value <sup>c</sup> | rs17367504              | rs5068 |
| rs4846049        | T/G                           | -0.5411 (0.0963)                         | $1.92 \times 10^{-8}$  | -0.3865 (0.1208)                         | $1.37 \times 10^{-3}$  | 0.333                   | 0.076  |
| rs17367504       | G/A                           | -0.6009 (0.1237)                         | $1.20 \times 10^{-6}$  | -0.1547 (0.1751)                         | 0.38                   |                         | 0.258  |
| rs5068           | G/A                           | -0.8083 (0.1943)                         | $3.18 \times 10^{-5}$  | -0.3895 (0.2326)                         | 0.094                  |                         |        |

Notes: **a.** Conditional analyses were performed for three SNPs at the MTHFR-NPPB locus that showed strong association with DBP in our meta-analysis but that were in weak/moderate pairwise LD. **b.** Effect size estimates ( $\beta_{\text{SNP}}$ ), standard errors and P-values for single SNP regression analyses, and for an otherwise identical three-SNP multiple regression analysis, meta-analysed over all studies in our discovery analysis. For each SNP in the multi-SNP regression performed within each study, the effect size estimate and confidence interval for a partial t-test correspond to an association analysis for the given SNP with other SNPs included as covariates, and hence were combined over studies using a standard inverse variance weighted meta-analysis with our modified weighting scheme for ascertained and non-ascertained studies. **c.** Because genomic control cannot be applied in the multiple regression analysis, we present all results in this table without genomic control.

### 3 Acknowledgments

This work was supported by the British Heart Foundation (grant number PG/07/131/24254 to P.B.M.) for HumanCVD BeadChip genotyping for the AIBIII, ASCOT, BRIGHT, MDC and NORDIL cohorts; by the Wellcome Trust (grant number 093078/Z/10/Z to T.J.); and in part by a VIP award from the Wellcome Trust to Queen Mary University of London in the 2009/2010 academic year.

Additional data collection and analysis for specific cohorts and individuals was supported as follows. **AIBIII:** This work was supported by the Higher Education Authority (Ireland), Programme for Research in Third-Level Institutions Cycle 3, Programme for Human Genomics. We thank the Allied Irish Bank and their employees for facilitating the study. **ASCOT:** This work was supported by Pfizer, New York, NY, USA, for the ASCOT study and the collection of the ASCOT DNA repository; by Servier Research Group, Paris, France; and by Leo Laboratories, Copenhagen, Denmark. We thank all ASCOT trial participants, physicians, nurses, and practices in the participating countries for their important contribution to the study. In particular we thank Clare Muckian and David Toomey for their help in DNA extraction, storage, and handling. **BRIGHT:** This work was supported by the Medical Research Council of Great Britain (grant number G9521010D); and by the British Heart Foundation (grant number PG/02/128). A.F.D. was supported by the British Heart Foundation (grant numbers RG/07/005/23633, SP/08/005/25115); and by the European Union Ingenious HyperCare Consortium: Integrated Genomics, Clinical Research, and Care in Hypertension (grant number LSHM-C7-2006-037093). The BRIGHT study is extremely grateful to all the patients who participated in the study and the BRIGHT nursing team. We would also like to thank the Barts Genome Centre staff for their assistance with this project. This work forms part of the research themes contributing to the translational research portfolio for Barts and the London Cardiovascular Biomedical Research Unit, which is supported and funded by the National Institute for Health Research. **BRHS:** This work was supported by the British Heart Foundation (grant numbers FS05/125 and PG/97012), for DNA extraction and for collection of phenotypic information. **BWHHS:** This work was supported by the British Heart Foundation (grant number PG/07/131/24254) for genotyping work; and by the Department of Health Policy Research Programme (England). We thank all participants and the GPs, nurses and staff who supported data collection and preparation. The views expressed in this paper are those of the authors and not necessarily those of any funding body. **Cardiogenics:** This work was supported by the European Union (grant number LSHM-CT 2006-037593). Healthy subjects were recruited from the National Institute for Health Research funded Cambridge BioResource. **ELSA:** This work was supported by National Institute on Aging in the United States (grant number R01 AG017644-09S1), for the English Longitudinal Study of Ageing (ELSA) DNA Repository (EDNAR), which contributed samples used in this work. This work was also supported by a consortium of United Kingdom Government departments coordinated by the Office for National Statistics. ELSA was developed by a team of researchers based at University College of London, the National Centre for Social Research, and the Institute for Fiscal Studies. We thank participants of the ELSA study. The developers and funders of ELSA do not bear any responsibility for the analyses or interpretations presented here. **GRAPHIC:** This work was supported by the British Heart Foundation (grant numbers RG/2001004, PG/07/132/24256) for recruitment and genotyping of the GRAPHIC cohort. N.J.S. was supported by a British Heart Foundation Chair of Cardiology (grant number CH/03/001). M.D.T. was supported by a Medical Research Council Clinician Scientist Fellowship (grant number G0501942). This study is part of the research portfolio supported by the Leicester National Institute for Health Research Biomedical Research Unit in Cardiovascular Disease. **HYPERGENES** This work was supported by a Large Cooperative Project funded by the European Union within the Seventh Framework Programme (grant number HEALTH-F4-2007-201550) for a European Network for Genetic-Epidemiological Studies: Building a method to dissect complex genetic traits, using essential hypertension as a disease model. The following HYPERGENES groups participated: (1) University of Milano and Fondazione Filarete with Daniele Cusi, Project Coordinator, Fabio Macciardi co-PI, Andrea Stucchi, Cristina Barlassina, Erika Salvi, Francesca Frau, Sara Lupoli, Federica Rizzi, Andrea Calabria, Maurizio Marconi, Gianna Petrini, Vincenzo Toschi, Giancarlo Mariotti, Maurizio Turiel; (2) University of Leuven, Division of Hypertension and Cardiovascular Rehabilitation, Department of Cardiovascular Diseases, with Robert Fagard, Yu Jin, Tatiana Kuznetsova, Tom Richart, Jan A. Staessen, and Lutgarde Thijs; (3) Jagiellonian University Medical College, Krakow, with Kalina Kawecka-Jaszcz, Katarzyna Stolarz-Skrzypek, Agnieszka Olszanecka, Wiktoria Wojciechowska, Małgorzata Kloch-Badełek; (4) IBM Israel Science and Technology LTD, with Amnon Shabo, Ariel Frakash, Simona Cohen, Boaz Carmeli, Dan Pelleg, Michal Rosen-Zvi, Hani Neuvirth-Telem; (5) I.M.S. Istituto di Management Sanitario S.r.l., Milan, with Pietro Conti, Costanza Conti, Mariella DAlessio; (6) Institute of

Internal Medicine, Siberian Branch of Russian Academy of Medical Science, Novosibirsk, with Yuri Nikitin, Galina Simonova, Sofia Malyutina, Elena Pello; (7) Imperial College of Science, Technology and Medicine, with Paolo Vineis and Clive J Hoggart; (8) INSERM Institut National de la Santé U772, with Xavier Jeunemaitre, Pierre-François Plouin, Michel Azizi (9) University of Warwick. Cardiovascular Medicine and Epidemiology Group, Clinical Sciences Research Institute, with Francesco P Cappuccio, Michelle A Miller, Chen Ji; (10) Università degli Studi di Sassari-AOU. Hypertension and Cardiovascular Prevention Centre, with Nicola Glorioso, Giuseppe Argiolas, Silvia Pitzoi, Emanuela Bulla, Roberta Zaninello, Patrizia Bulla, Simone Fadda, Gianclaudia Cappai, Siria Motroni, Chiara Maria Troffa; (11) STMICROELECTRONICS SRL, with Tony Barbuzzi; (12) University of Lausanne. Department of Medical Genetics, with Carlo Rivolta, Jacques S. Beckmann, Zoltan Kutalik, Paola Benaglio, Sven Bergmann, Murielle Bochud, Diana Marek, and Bastian Peter; (13) Pharnext S.A.S., Paris, with Matthieu Bouaziz, Caroline Paccard, Mickaël Guedj, and Ilya Chumakov; (14) Softeco Sismat Spa, Genova, with Sefano Bianchi; (15) Shanghai Institute of Hypertension, with Jiguang Wang and Li Yan; (16) Charles University in Prague. Department of Internal Medicine II, Pilsen, with Jan Filipovsky, Jitka Seidlerova, Otto Mayer Jr., Milena Dolejsova, Jana Hirmerova, Jana Strizova; (17) University of Padova, Department of Clinical and Experimental Medicine, with Edoardo Casiglia and Valérie Tikhonoff; (18) Medical University of Gdansk. Hypertension Unit, Department of Hypertension and Diabetology, with Krzysztof Narkiewicz, Marzena Chrostowska, Wojciech Sakiewicz, Michal Wojtowicz, Michal Hoffmann; (19) University Vita-Salute San Raffaele, with Paolo Manunta, Chiara Lanzani, Maria Teresa Sciarrone, Lorena Citterio, Laura Zagato, Giuseppe Bianchi; (20) Licia Iacoviello, Università Cattolica del Sacro Cuore, Campobasso, Italy. Regarding the present work, cases and controls were recruited within specific cohorts/networks: FLEMENGHO/EPOGH cohort (Coordinator J. Staessen, contributing Units 2, 3, 6, 16, 17, 18); Wandsworth Heart and Stroke Study (WHSS, Coordinator F. Cappuccio, contributing Unit 9); IMMIDIET cohort (coordinator L. Iacoviello, contributing Unit 20); Milano-Sassari cohort (coordinator D. Cusi, contributing Units 1, 10, 19); SOPHIA cohort (coordinator N. Glorioso, contributing Unit 10). **HYPEST:** This work was supported by the Wellcome Trust (grant numbers 070191/Z/03/Z, 070191/Z/03/A) International Senior Research Fellowship to M.L.; by an Estonian Ministry of Education and Science core grant (grant number 0182721s06 to M.L.); by the Estonians Science Foundation (grant number ETF7491 to E.O.), by an Estonian core grant (grant number SF0140027s07 to M.V.); and by the European Union European Regional Development Fund. Piret Kelgo is acknowledged for technical assistance. **INTERGENE:** This work was supported by the Västra Götaland County Council; by the Swedish Council for Working Life and Social Research; by the Swedish Research Council (EpiLife); by the Swedish Research Council for Environment and Spatial Planning; by the Swedish Heart and Lung Foundation; and by AstraZeneca R&D Sweden. **MDC:** This work was supported by the Swedish Medical Research Council; by the Swedish Heart and Lung Foundation; by the Medical Faculty of Lund University, Malmö University Hospital; by the Albert Pålsson Research Foundation; by the Crafoord foundation; by the Ernhold Lundströms Research Foundation, the Region Skane; by the Hulda and Conrad Mossfelt Foundation; by the King Gustaf V and Queen Victoria Foundation; by the Lennart Hanssons Memorial Fund; and by the Marianne and Marcus Wallenberg Foundation. **MRC NSHD:** This work was supported by the Medical Research Council. We are very grateful to the members of this birth cohort for their continuing interest and participation in the study. **NBS:** This work was supported by the Wellcome Trust (grant number 076113/C/04/Z); by the National Institute for Health Research (grant number RP-PG-0310-1002) programme grant to NHSBT, and a National Institute for Health Research grant to the Cambridge Comprehensive Biomedical Research Centre; and by the British Heart Foundation (grant number PG/07/132/24256) for HumanCVD BeadChip genotyping for the UKBS-CC cohort. We acknowledge use of DNA from the United Kingdom Blood Services collection of Common Controls (UKBS-CC collection), funded by the Wellcome Trust and by the National Institute for Health Research. The collection was established as part of the Wellcome Trust Case Control Consortium (WTCCC 2007). **NORDIL:** This work was supported by the British Heart Foundation (grant number CH/98001 to A.F.D., RG/07/005/23633 to A.F.D., S.P. and C.D.) and a Special Project, for genotyping of the Swedish extremes from the NORDIL and MDC cohorts; and by Pharmacia. We thank Professor Thomas Hedner (Department of Clinical Pharmacology, Sahlgrenska Academy, Gotheburg, Sweden) and Professor Sverre Kjeldsen (Ullevaal University Hospital, University of Oslo, Oslo, Norway), who are investigators of the NORDIL study. Professor Kjeldsen is also an investigator of the ASCOT trial. **OHGS:** This work was supported by the Canadian Institutes of Health Research (grant numbers MOP82810 to R.R., MOP172605 to Ruth McPherson, MOP77682 to A.F.R.S.); by the Canada Foundation for Innovation (grant number 11966 to R.R.), and by the Heart and Stroke Foundation of Ontario (grant number NA6001 to Ruth McPherson). **P.E.** was supported in part by

the Imperial College Healthcare National Health Service Trust Comprehensive Biomedical Research Centre, funded by the National Institute for Health Research. P.E. is a National Institute for Health Research Senior Investigator. **Peripheral blood and tissue eSNP data:** This work was supported by the Netherlands Genomics Initiative (grant number 93519031) Horizon Breakthrough grant to L.F.; by NWO (grant number 916.10.135) VENI grant; and by the European Community Health Seventh Framework Programme (grant number FP7/2007-2013) under grant agreement number 259867. **PROCARDIS:** This work was supported by the British Heart Foundation; by the European Community Sixth Framework Programme (grant number LSHM-CT-2007-037273); and by AstraZeneca AB. R.C., M.F. and H.W. are supported by the British Heart Foundation Centre for Research Excellence; M.F. and H.W. acknowledge support from the Wellcome Trust; R.C. acknowledges support from the Medical Research Council; A.H. obtained support for this project from the Swedish Heart-Lung Foundation; from the Swedish Medical Research Council (grant number 8691); from the Knut and Alice Wallenberg Foundation; from the Karolinska Institute; and from the Stockholm County Council (grant number 560183). **WHII:** This work was supported by the British Heart Foundation (grant numbers PG/07/133/24260, RG/08/008, SP/07/007/23671), Senior Fellowship to A.D.H. (grant number FS/2005/125), Chair for S.E.H.; by the National Heart Lung and Blood Institute (grant number HL36310) for M.Kivimaki's and M.Kumari's contributions to this work; by the Medical Research Council (grant number G0802432) Population Health Scientist Fellowship to M.V.H.; by the Health and Safety Executive; by the Department of Health; by the National Institute on Aging in the United States (grant number AG13196); by the Agency for Health Care Policy Research (grant number HS06516); by the John D. and Catherine T. MacArthur Foundation Research Networks on Successful Midlife Development and Socio-economic Status and Health.

**Conflicts of interest.** The following authors declare the following potential conflicts of interest: F.N. is a full time employee at AstraZeneca. J.W. is a full time employee at GlaxoSmithKline. N.R.P. has received financial support from several pharmaceutical companies which manufacture either blood pressure lowering or lipid lowering agents, or both, and consultancy fees. P.S. has received research awards from Pfizer Inc. No other authors reported conflicts of interest.



## 4 Internet resources

On 12 October 2011 we verified the internet resource URLs for the detailed study and reagent descriptions, for public releases of genotype and sequence data, for data annotation, and for software used for this work:

- Birdseed genotype calling algorithm  
<http://www.broadinstitute.org/mpg/birdsuite/birdseed.html>
- BRITish Genetics of HyperTension (BRIGHT) study  
<http://www.brightstudy.ac.uk>
- British Regional Heart Study (BRHS)  
<http://www.ucl.ac.uk/pcph/research-groups-themes/brhs-pub>
- British Womens Heart and Health Study (BWHHS)  
<http://www.lshtm.ac.uk/eph/ncde/research/bwhhs>
- Cardiogenics consortium  
<https://www.cardiogenics.org>
- ENCODE project ChIP-Seq raw signal data and TFBS peak regions  
<http://genome.ucsc.edu/cgi-bin/hgTables>
- ENCODE project controlled vocabulary for antibodies used for ChIP-Seq  
<http://genome.ucsc.edu/cgi-bin/hgEncodeVocab?ra=encode/cv.ra&type=Antibody>
- HYPERGENES European network for genetic-epidemiological studies  
<http://www.hypergenes.eu>
- Illumina HumanCVD BeadChip genotyping array  
[http://www.illumina.com/products/humancvd.whole\\_genome\\_genotyping\\_kits.ilmn](http://www.illumina.com/products/humancvd.whole_genome_genotyping_kits.ilmn)
- Illuminus genotype calling algorithm  
<http://homepages.lshtm.ac.uk/tgclark/downloads>
- International HapMap project  
<http://hapmap.ncbi.nlm.nih.gov>
- KASPAR genotyping systems  
<http://www.kbioscience.co.uk/reagents/KASP.html>
- Medical Research Council National Survey of Health and Development (MRC NSHD)  
<http://www.nshd.mrc.ac.uk>
- National Human Genome Resource Institute catalog of published GWAS  
<http://www.genome.gov/gwastudies>
- Online Mendelian Inheritance in Man (OMIM)  
<http://www.omim.org>
- PLINK genetic analysis software  
<http://pngu.mgh.harvard.edu/~purcell/plink>
- PRecOcius Coronary ARtery DISease (PROCARDIS) study  
<http://www.procardis.org>
- R software for statistical computing and graphics  
<http://www.r-project.org>
- SNPTEST genetic association analysis software  
[https://mathgen.stats.ox.ac.uk/genetics\\_software/snptest/snptest.html](https://mathgen.stats.ox.ac.uk/genetics_software/snptest/snptest.html)
- Thousand genomes (1000G) project  
<http://www.1000genomes.org>
- Thousand genomes (1000G) project June 2010 early release data  
<http://sph.umich.edu/csg/abecasis/MACH/download/1000G-2010-06.html>

## 5 Author contributions

T.J. and P.B.M. designed the study and wrote analysis plans. T.J. performed statistical analyses. T.J. and P.B.M. interpreted the results and wrote the paper. All authors revised and approved the manuscript.

Additional contributions for specific cohorts were as follows.

**AIBIII:** Recruitment and Phenotyping: E.T.O'B., A.V.S.; Genotyping and Association Analyses: P.J.H., T.J., P.B.M., S.J.N., A.O., S.S.-H.

**ASCOT:** Recruitment and Phenotyping: M.J.C., N.R.P., P.S., S.T.; Genotyping and Association Analyses: D.C.S., P.J.H., T.J., P.B.M., S.J.N., A.O., S.S.-H.

**BRHS:** Recruitment and Phenotyping: R.W.M., S.G.W., P.H.W.; Genotyping and Association Analyses: A.D.H., R.W.M.

**BRIGHT:** Recruitment and Phenotyping: M.J.B., J.M.C., M.J.C., A.F.D., P.B.M., N.J.S.; Genotyping and Association Analyses: R.J.D., P.J.H., T.J., C.A.M., P.B.M., S.J.N., A.O., S.S.-H., C.W.

**BWHHS:** Recruitment and Phenotyping: J.-P.C., D.A.L., G.D.S.; Genotyping and Association Analyses: I.N.M.D., T.R.G.

**Cardiogenics Consortium:** eSNP analyses: A.H.G., C.P.N., N.J.S.

**EAS:** Recruitment and Phenotyping: F.G.F., I.T.; Genotyping and Association Analyses: I.T.

**ELSA:** Recruitment and Phenotyping: M.Kumari; Genotyping and Association Analyses: T.J., M.Kumari

**Global BPgen Consortium:** Contributions are described in full elsewhere (Newton-Cheh *et al.* 2009)

**GRAPHIC:** Recruitment and Phenotyping: P.R.B., N.J.S., M.D.T., M.T.; Genotyping and Association Analyses: P.S.B., C.P.N., N.J.S., M.T., P.v.d.H.

**HYPERGENES:** Recruitment and Phenotyping: D.C., N.D., N.G., X.J., P.-F.P., A.S., J.A.S., J.T.; Genotyping and Association Analyses: D.C., H.N., E.S.

**HYPEST:** Recruitment and Phenotyping: P.J., M.Laan, E.O., M.P., G.V., M.V.; Genotyping and Association Analyses: M.Laan, S.Söber

**INTERGENE:** Recruitment and Phenotyping: F.N., A.R., D.S.T.; Genotyping and Association Analyses: A.L., F.N.

**MDC/NORDIL:** Recruitment and Phenotyping: A.F.D., C.E.H., T.H., W.K.L., O.M., S.P., B.W.; Genotyping and Association Analyses: A.F.D., C.E.H., T.J., S.J.N., W.K.L., S.P.

**MRC NHSD:** Recruitment and Phenotyping: R.H., D.K., A.W.; Genotyping and Association Analyses: R.H., D.K., A.W.

**NBS:** Recruitment and Phenotyping: W.H.O., J.Sambrook, J.Stephens; Genotyping and Association Analyses: P.S.B., N.J.S.

**NPHSII:** Genotyping and Association Analyses: J.A.C., S.E.H., J.P., P.J.T.

**OHGS:** Recruitment and Phenotyping: R.R., G.A.W.; Genotyping and Association Analyses: L.C., A.F.R.S.

**Peripheral blood and tissue eSNP data:** eSNP analyses: L.F., H.-J.W., M.G.M.W.

**PROCARDIS:** Recruitment and Phenotyping: R.C., M.F., M.G.F., A.H., M.Lathrop, J.F.P., U.S., H.W.; Genotyping and Association Analyses: M.F., A.G., M.Lathrop, J.F.P.

**WHII:** Recruitment and Phenotyping: F.D., M.Kivimaki, M.Kumari, S.Shah; Genotyping and Association Analyses: J.-P.C., F.D., A.D.H., M.V.H., S.E.H., M.Kivimaki, M.Kumari, S.Shah, T.S., J.W.

## 6 Global BPgen (GBPG) consortium members and affiliations

Christopher Newton-Cheh<sup>1,2,3,94</sup>, Toby Johnson<sup>4,5,6,94</sup>, Vesela Gateva<sup>7,94</sup>, Martin D Tobin<sup>8,94</sup>, Murielle Bochud<sup>5</sup>, Lachlan Coin<sup>9</sup>, Samer S Najjar<sup>10</sup>, Jing Hua Zhao<sup>11,12</sup>, Simon C Heath<sup>13</sup>, Susana Eyheramendy<sup>14,15</sup>, Konstantinos Papadakis<sup>16</sup>, Benjamin F Voight<sup>1,3</sup>, Laura J Scott<sup>7</sup>, Feng Zhang<sup>17</sup>, Martin Farrall<sup>18,19</sup>, Toshiko Tanaka<sup>20,21</sup>, Chris Wallace<sup>22,23</sup>, John C Chambers<sup>9</sup>, Kay-Tee Khaw<sup>12,24</sup>, Peter Nilsson<sup>25</sup>, Pim van der Harst<sup>26</sup>, Silvia Polidoro<sup>27</sup>, Diederick E Grobbee<sup>28</sup>, N Charlotte Onland-Moret<sup>28,29</sup>, Michiel L Bots<sup>28</sup>, Louise V Wain<sup>8</sup>, Katherine S Elliott<sup>19</sup>, Alexander Teumer<sup>30</sup>, Jian'an Luan<sup>11</sup>, Gavin Lucas<sup>31</sup>, Johanna Kuusisto<sup>32</sup>, Paul R Burton<sup>8</sup>, David Hadley<sup>16</sup>, Wendy L McArdle<sup>33</sup>, Wellcome Trust Case Control Consortium<sup>34</sup>, Morris Brown<sup>35</sup>, Anna Dominiczak<sup>36</sup>, Stephen J Newhouse<sup>22</sup>, Nilesh J Samani<sup>37</sup>, John Webster<sup>38</sup>, Eleftheria Zeggini<sup>19,39</sup>, Jacques S Beckmann<sup>4,40</sup>, Sven Bergmann<sup>4,6</sup>, Noha Lim<sup>41</sup>, Kijoung Song<sup>41</sup>, Peter Vollenweider<sup>42</sup>, Gerard Waeber<sup>42</sup>, Dawn M Waterworth<sup>41</sup>, Xin Yuan<sup>41</sup>, Leif Groop<sup>43,44</sup>, Marju Orho-Melander<sup>25</sup>, Alessandra Allione<sup>27</sup>, Alessandra Di Gregorio<sup>27,45</sup>, Simonetta Guarrera<sup>27</sup>, Salvatore Panico<sup>46</sup>, Fulvio Ricceri<sup>27</sup>, Valeria Romanazzi<sup>27,45</sup>, Carlotta Sacerdote<sup>47</sup>, Paolo Vineis<sup>9,27</sup>, Inês Barroso<sup>12,39</sup>, Manjinder S Sandhu<sup>11,12,24</sup>,

Robert N Luben<sup>12,24</sup>, Gabriel J. Crawford<sup>3</sup>, Pekka Jousilahti<sup>48</sup>, Markus Perola<sup>48,49</sup>, Michael Boehnke<sup>7</sup>, Lori L Bonnycastle<sup>50</sup>, Francis S Collins<sup>50</sup>, Anne U Jackson<sup>7</sup>, Karen L Mohlke<sup>51</sup>, Heather M Stringham<sup>7</sup>, Timo T Valle<sup>52</sup>, Cristen J Willer<sup>7</sup>, Richard N Bergman<sup>53</sup>, Mario A Morcken<sup>50</sup>, Angela Döring<sup>15</sup>, Christian Gieger<sup>15</sup>, Thomas Illig<sup>15</sup>, Thomas Meitinger<sup>54,55</sup>, Elin Org<sup>56</sup>, Arne Pfeufer<sup>54</sup>, H Erich Wichmann<sup>15,57</sup>, Sekar Kathiresan<sup>1,2,3</sup>, Jaume Marrugat<sup>31</sup>, Christopher J O'Donnell<sup>58,59</sup>, Stephen M Schwartz<sup>60,61</sup>, David S Siscovick<sup>60,61</sup>, Isaac Subirana<sup>31,62</sup>, Nelson B Freimer<sup>63</sup>, Anna-Liisa Hartikainen<sup>64</sup>, Mark I McCarthy<sup>19,65,66</sup>, Paul F O'Reilly<sup>9</sup>, Leena Peltonen<sup>39,49</sup>, Anneli Pouta<sup>64,67</sup>, Paul E de Jong<sup>68</sup>, Harold Snieder<sup>69</sup>, Wiek H van Gilst<sup>26</sup>, Robert Clarke<sup>70</sup>, Anuj Goel<sup>18,19</sup>, Anders Hamsten<sup>71</sup>, John F Peden<sup>18,19</sup>, Udo Seedorf<sup>72</sup>, Ann-Christine Syvänen<sup>73</sup>, Giovanni Tognoni<sup>74</sup>, Edward G Lakatta<sup>10</sup>, Serena Sanna<sup>75</sup>, Paul Scheet<sup>76</sup>, David Schlessinger<sup>77</sup>, Angelo Scuteri<sup>78</sup>, Marcus Dörr<sup>79</sup>, Florian Ernst<sup>30</sup>, Stephan B Felix<sup>79</sup>, Georg Homuth<sup>30</sup>, Roberto Lorbeer<sup>80</sup>, Thorsten Reffelmann<sup>79</sup>, Rainer Rettig<sup>81</sup>, Uwe Völker<sup>30</sup>, Pilar Galan<sup>82</sup>, Ivo G Gut<sup>13</sup>, Serge Hercberg<sup>82</sup>, G Mark Lathrop<sup>13</sup>, Diana Zeleneka<sup>13</sup>, Panos Deloukas<sup>12,39</sup>, Nicole Soranzo<sup>17,39</sup>, Frances M Williams<sup>17</sup>, Guangju Zhai<sup>17</sup>, Veikko Salomaa<sup>48</sup>, Markku Laakso<sup>32</sup>, Roberto Elosua<sup>31,62</sup>, Nita G Forouhi<sup>11</sup>, Henry Völzke<sup>80</sup>, Cuno S Uiterwaal<sup>28</sup>, Yvonne T van der Schouw<sup>28</sup>, Mattijs E Numans<sup>28</sup>, Giuseppe Matullo<sup>27,45</sup>, Gerjan Navis<sup>68</sup>, Göran Berglund<sup>25</sup>, Sheila A Bingham<sup>12,83</sup>, Jaspal S Kooner<sup>84</sup>, Andrew D Paterson<sup>85</sup>, John M Connell<sup>36</sup>, Stefania Bandinelli<sup>86</sup>, Luigi Ferrucci<sup>21</sup>, Hugh Watkins<sup>18,19</sup>, Tim D Spector<sup>17</sup>, Jaakko Tuomilehto<sup>52,87,88</sup>, David Altshuler<sup>1,3,89,90</sup>, David P Strachan<sup>16</sup>, Maris Laan<sup>56</sup>, Pierre Meneton<sup>91</sup>, Nicholas J Wareham<sup>11,12</sup>, Manuela Uda<sup>75</sup>, Marjo-Riitta Jarvelin<sup>9,67,92</sup>, Vincent Mooser<sup>41</sup>, Olle Melander<sup>25</sup>, Ruth JF Loos<sup>11,12</sup>, Paul Elliott<sup>9,95</sup>, Gonçalo R Abecasis<sup>93,95</sup>, Mark Caulfield<sup>22,95</sup>, Patricia B Munroe<sup>22,95</sup>

1. Center for Human Genetic Research, Massachusetts General Hospital, 185 Cambridge Street, Boston, MA 02114, USA
2. Cardiovascular Research Center, Massachusetts General Hospital, Boston, Massachusetts 02114, USA
3. Program in Medical and Population Genetics, Broad Institute of Harvard and Massachusetts Institute of Technology, Cambridge, Massachusetts, 02142, USA
4. Department of Medical Genetics, University of Lausanne, 1005 Lausanne, Switzerland
5. University Institute for Social and Preventative Medicine, Centre Hospitalier Universitaire Vaudois (CHUV) and University of Lausanne, 1005 Lausanne, Switzerland
6. Swiss Institute of Bioinformatics, Switzerland
7. Department of Biostatistics and Center for Statistical Genetics, University of Michigan, Ann Arbor, MI 48109, USA
8. Departments of Health Sciences & Genetics, Adrian Building, University of Leicester, University Road, Leicester LE1 7RH
9. Department of Epidemiology and Public Health, Imperial College London, St Mary's Campus, Norfolk Place, London W2 1PG, UK
10. Laboratory of Cardiovascular Science, Intramural Research Program, National Institute on Aging, National Institutes of Health, Baltimore, Maryland, USA 21224
11. MRC Epidemiology Unit, Institute of Metabolic Science, Addenbrooke's Hospital, Cambridge CB2 0QQ, UK
12. Cambridge - Genetics of Energy Metabolism (GEM) Consortium, Cambridge, UK
13. Centre National de Génotypage, 2 rue Gaston Crémieux, CP 5721, 91 057 Evry Cedex, France
14. Pontificia Universidad Católica de Chile, Vicuña Mackenna 4860, Facultad de Matemáticas, Casilla 306, Santiago 22, Chile, 7820436
15. Institute of Epidemiology, Helmholtz Zentrum München, German Research Centre for Environmental Health, 85764 Neuherberg, Germany
16. Division of Community Health Sciences, St Georges, University of London, London SW17 0RE, UK
17. Dept of Twin Research & Genetic Epidemiology, King's College London, London SE1 7EH
18. Dept. Cardiovascular Medicine, University of Oxford
19. The Wellcome Trust Centre for Human Genetics, Roosevelt Drive, Oxford, OX3 7BN, UK
20. Medstar Research Institute, 3001 S. Hanover Street, Baltimore, MD 21250, USA
21. Clinical Research Branch, National Institute on Aging, Baltimore, MD, 21250 USA
22. Clinical Pharmacology and The Genome Centre, William Harvey Research Institute, Barts and The London School of Medicine and Dentistry, Queen Mary University of London, London EC1M 6BQ
23. JDRF/WT Diabetes and Inflammation Laboratory, Cambridge Institute for Medical Research University of Cambridge, Wellcome Trust/MRC Building, Addenbrooke's Hospital Cambridge, CB2 0XY

24. Department of Public Health and Primary Care, Institute of Public Health, University of Cambridge, Cambridge CB2 2SR, UK
25. Department of Clinical Sciences, Lund University, Malmö University Hospital, SE-20502 Malmö, Sweden
26. Department of Cardiology University Medical Center Groningen, University of Groningen, Hanzeplein 1, 9700 RB Groningen, The Netherlands
27. ISI Foundation (Institute for Scientific Interchange), Villa Gualino, Torino, 10133, Italy
28. Julius Center for Health Sciences and Primary Care, University Medical Center Utrecht, STR 6.131, PO Box 85500, 3508 GA Utrecht, The Netherlands
29. Complex Genetics Section, Department of Medical Genetics - DBG, University Medical Center Utrecht, STR 2.2112, PO Box 85500, 3508 GA Utrecht, The Netherlands.
30. Interfaculty Institute for Genetics and Functional Genomics, Ernst-Moritz-Arndt-University Greifswald, 17487 Greifswald, Germany
31. Cardiovascular Epidemiology and Genetics, Institut Municipal d'Investigació Mèdica, Barcelona, Spain
32. Department of Medicine University of Kuopio 70210 Kuopio, Finland
33. ALSPAC Laboratory, Department of Social Medicine, University of Bristol, BS8 2BN, UK
34. A full list of authors is provided elsewhere.
35. Clinical Pharmacology Unit, University of Cambridge, Addenbrookes Hospital, Cambridge, UK CB2 2QQ
36. BHF Glasgow Cardiovascular Research Centre, University of Glasgow, Glasgow, UK G12 8TA
37. Dept of Cardiovascular Science, University of Leicester, Glenfield Hospital, Groby Road, Leicester, LE3 9QP, UK
38. Aberdeen Royal Infirmary, Aberdeen, UK
39. Wellcome Trust Sanger Institute, Wellcome Trust Genome Campus, Hinxton, Cambridge CB10 1SA, UK
40. Service of Medical Genetics, Centre Hospitalier Universitaire Vaudois (CHUV), Lausanne, 1011, Switzerland
41. Genetics Division, GlaxoSmithKline, King of Prussia, PA 19406, USA
42. Department of Internal Medicine, Centre Hospitalier Universitaire Vaudois (CHUV) 1011 Lausanne, Switzerland
43. Department of Clinical Sciences, Diabetes and Endocrinology Research Unit, University Hospital, Malmö
44. Lund University, Malmö S-205 02, Sweden
45. Department of Genetics, Biology and Biochemistry, University of Torino, Torino, 10126, Italy
46. Department of Clinical and Experimental Medicine, Federico II University, Naples, 80100, Italy
47. Unit of Cancer Epidemiology, University of Turin and Centre for Cancer Epidemiology and Prevention (CPO Piemonte), Turin, 10126, Italy
48. National Institute for Welfare and Health P.O. Box 30, FI-00271 Helsinki, Finland
49. Institute for Molecular Medicine Finland FIMM, University of Helsinki and National Public Health Institute
50. Genome Technology Branch, National Human Genome Research Institute, Bethesda, MD 20892, USA
51. Department of Genetics, University of North Carolina, Chapel Hill, NC 27599, USA
52. Diabetes Unit, Department of Epidemiology and Health Promotion, National Public Health Institute, 00300 Helsinki, Finland
53. Physiology and Biophysics USC School of Medicine 1333 San Pablo Street, MMR 626 Los Angeles, California 90033
54. Institute of Human Genetics, Helmholtz Zentrum München, German Research Centre for Environmental Health, 85764 Neuherberg, Germany
55. Institute of Human Genetics, Technische Universität München, 81675 Munich, Germany
56. Institute of Molecular and Cell Biology, University of Tartu, 51010 Tartu, Estonia
57. Ludwig Maximilians University, IBE, Chair of Epidemiology, Munich
58. Cardiovascular Research Center and Cardiology Division, Massachusetts General Hospital, Boston, Massachusetts 02114, USA

59. Framingham Heart Study and National, Heart, Lung, and Blood Institute, Framingham, Massachusetts 01702, USA
60. Cardiovascular Health Research Unit, Departments of Medicine and Epidemiology, University of Washington, Seattle, Washington, 98101 USA
61. Department of Epidemiology, University of Washington, Seattle, Washington, 98195 USA
62. CIBER Epidemiología y Salud Pública, Barcelona, Spain
63. Center for Neurobehavioral Genetics, Gonda Center, Room 3506, 695 Charles E Young Drive South, Box 951761, UCLA, Los Angeles, CA 90095.
64. Department of Clinical Sciences Obstetrics and Gynecology, P.O. Box 5000 Fin-90014, University of Oulu, Finland
65. Oxford Centre for Diabetes, Endocrinology and Metabolism, University of Oxford, Churchill Hospital, Old Road, Headington, Oxford OX3 7LJ, UK
66. Oxford NIHR Biomedical Research Centre, Churchill Hospital, Old Road, Headington, Oxford, UK OX3 7LJ
67. Department of Child and Adolescent Health, National Public Health Institute (KTL), Aapistie 1, P.O. Box 310, FIN-90101 Oulu, Finland
68. Division of Nephrology, Department of Medicine University Medical Center Groningen, University of Groningen, Hanzplein 1, 9700 RB Groningen, The Netherlands
69. Unit of Genetic Epidemiology and Bioinformatics, Department of Epidemiology University Medical Center Groningen, University of Groningen, Hanzplein 1, 9700 RB Groningen, The Netherlands
70. Clinical Trial Service Unit and Epidemiological Studies Unit (CTSU), University of Oxford, Richard Doll Building, Roosevelt Drive, Oxford, OX3 7LF, UK
71. Atherosclerosis Research Unit, Department of Medicine Solna, Karolinska Institutet, Karolinska University Hospital Solna, Building L8:03, S-17176 Stockholm, Sweden
72. Leibniz-Institut für Arterioskleroseforschung an der Universität Münster, Domagkstr. 3, D-48149, Münster, Germany
73. Molecular Medicine, Dept. Medical Sciences, Uppsala University, SE-751 85 Uppsala, Sweden
74. Consorzio Mario Negri Sud, Via Nazionale, 66030 Santa Maria Imbaro (Chieti), Italy
75. Istituto di Neurogenetica e Neurofarmacologia, CNR, Monserrato, 09042 Cagliari, Italy
76. Department of Epidemiology, Univ. of Texas M. D. Anderson Cancer Center, Houston, TX 77030
77. Laboratory of Genetics, Intramural Research Program, National Institute on Aging, National Institutes of Health, Baltimore, Maryland, USA 21224
78. Unit Operativa Geriatria, Istituto Nazionale Ricovero e Cura per Anziani (INRCA) IRCCS, Rome, Italy
79. Department of Internal Medicine B, Ernst-Moritz-Arndt-University Greifswald, 17487 Greifswald, Germany
80. Institute for Community Medicine, Ernst-Moritz-Arndt-University Greifswald, 17487 Greifswald, Germany
81. Institute of Physiology, Ernst-Moritz-Arndt-University Greifswald, 17487 Greifswald, Germany
82. U557 Institut National de la Santé et de la Recherche Médicale, U1125 Institut National de la Recherche Agronomique, Université Paris 13, 74 rue Marcel Cachin, 93017 Bobigny Cedex, France
83. MRC Dunn Human Nutrition Unit, Wellcome Trust/MRC Building, Cambridge CB2 0XY, U.K
84. National Heart and Lung Institute, Imperial College London SW7 2AZ
85. Program in Genetics and Genome Biology, Hospital for Sick Children, Toronto, Canada, Dalla Lana School of Public Health, University of Toronto, Toronto, Canada M5T 3M7
86. Geriatric Rehabilitation Unit, Azienda Sanitaria Firenze (ASF), 50125, Florence, Italy
87. Department of Public Health, University of Helsinki, 00014 Helsinki, Finland
88. South Ostrobothnia Central Hospital, 60220 Seinäjoki, Finland
89. Department of Medicine and Department of Genetics, Harvard Medical School, Boston, Massachusetts 02115, USA
90. Diabetes Unit, Massachusetts General Hospital, Boston, Massachusetts 02114, USA
91. U872 Institut National de la Santé et de la Recherche Médicale, Faculté de Médecine Paris Descartes, 15 rue de l'Ecole de Médecine, 75270 Paris Cedex, France

92. Institute of Health Sciences and Biocenter Oulu, Aapistie 1, FIN-90101, University of Oulu, Finland
93. Center for Statistical Genetics, Department of Biostatistics, University of Michigan, Ann Arbor, Michigan 48109 USA
94. These authors contributed equally
95. These authors contributed equally

## 7 Cardiogenics WP5 members and affiliations

Tony Attwood<sup>1</sup>, Stephanie Belz<sup>2</sup>, Peter Braund<sup>3</sup>, Jessy Brocheton<sup>4</sup> François Cambien<sup>4</sup>, Jason Cooper<sup>5</sup>, Abi Crisp-Hihn<sup>1</sup>, Patrick Diemert (formerly Linsel-Nitschke)<sup>2</sup>, Panos Deloukas<sup>6</sup>, Jeanette Eardman<sup>2</sup>, Nicola Foad<sup>1</sup>, Tiphaine Godefroy<sup>4</sup>, Alison H Goodall<sup>3,11</sup>, Jay Gracey<sup>3</sup>, Emma Gray<sup>6</sup>, Rhian Gwilliams<sup>6</sup>, Susanne Heimerl<sup>7</sup>, Christian Hengstenberg<sup>7</sup>, Jennifer Jolley<sup>1</sup>, Unni Krishnan<sup>3</sup>, Heather Lloyd-Jones<sup>1</sup>, Ulrika Liljedahl<sup>8</sup>, Ingrid Lugauer<sup>7</sup>, Per Lundmark<sup>8</sup>, Seraya Maouche<sup>2,4</sup>, Jasbir S Moore<sup>3</sup>, Gilles Montalescot<sup>4</sup>, David Muir<sup>1</sup>, Elizabeth Murray<sup>1</sup>, Chris P Nelson<sup>3</sup>, Jessica Neudert<sup>9</sup>, David Niblett<sup>6</sup>, Karen O'Leary<sup>1</sup>, Willem H Ouwehand<sup>1,6</sup>, Helen Pollard<sup>3</sup>, Carole Proust<sup>4</sup>, Angela Rankin<sup>1</sup>, Augusto Rendon<sup>12</sup>, Catherine M Rice<sup>6</sup>, Hendrik B Sager<sup>2</sup>, Nilesh J Samani<sup>3,11</sup>, Jennifer Sambrook<sup>1</sup>, Gerd Schmitz<sup>10</sup>, Michael Scholz<sup>9</sup>, Laura Schroeder<sup>2</sup>, Heribert Schunkert<sup>2</sup>, Jonathan Stephens<sup>1</sup>, Ann-Christine Syvannen<sup>8</sup>, Stefanie Tennstedt (formerly Gulde)<sup>2</sup>, Chris Wallace<sup>5</sup>

1. Department of Haematology, University of Cambridge, Long Road, Cambridge, CB2 2PT, UK and National Health Service Blood and Transplant, Cambridge Centre, Long Road, Cambridge, CB2 2PT, UK
2. Medizinische Klinik 2, Universität zu Lübeck, Lübeck, Germany
3. Department of Cardiovascular Sciences, University of Leicester, Glenfield Hospital, Groby Road, Leicester, LE3 9QP, UK
4. INSERM UMRS 937, Pierre and Marie Curie University (UPMC, Paris 6) and Medical School, 91 Bd de l'Hôpital 75013, Paris, France
5. Juvenile Diabetes Research Foundation/Wellcome Trust Diabetes and Inflammation Laboratory, Department of Medical Genetics, Cambridge Institute for Medical Research, University of Cambridge, Wellcome Trust/MRC Building, Cambridge, CB2 0XY, UK
6. The Wellcome Trust Sanger Institute, Wellcome Trust Genome Campus, Hinxton, Cambridge CB10 1SA, UK
7. Klinik und Poliklinik für Innere Medizin II, Universität Regensburg, Germany
8. Molecular Medicine, Department of Medical Sciences, Uppsala University, Uppsala, Sweden
9. Trium, Analysis Online GmbH, Hohenlindenerstr. 1, 81677, München, Germany
10. Institut für Klinische Chemie und Laboratoriumsmedizin, Universität Regensburg, D-93053 Regensburg, Germany
11. Leicester NIHR Biomedical Research Unit in Cardiovascular Disease, Glenfield Hospital, Leicester, LE3 9QP, UK
12. European Bioinformatics Institute, Wellcome Trust Genome Campus, Hinxton, Cambridge, CB10 1SD, UK

## References

- 1000 Genomes Project Consortium (2010) A map of human genome variation from population-scale sequencing. *Nature* **467**:1061–1073. doi:10.1038/nature09534.
- Berg, C., G. Lappas, A. Wolk, E. Strandhagen, K. Torén, A. Rosengren, D. Thelle and L. Lissner (2009) Eating patterns and portion size associated with obesity in a Swedish population. *Appetite* **52**:21–26.
- Berglund, G., S. Elmstahl, L. Janzon and S. A. Larsson (1993) The Malmö diet and cancer study. Design and feasibility. *J. Intern. Med.* **233**:45–51.
- Caulfield, M., P. Munroe, J. Pembroke, N. Samani, A. Dominiczak, M. Brown, N. Benjamin, J. Webster, P. Ratcliffe, S. O’Shea, J. Papp, E. Taylor, R. Dobson, J. Knight, S. Newhouse, J. Hooper, W. Lee, N. Brain, D. Clayton, G. M. Lathrop, M. Farrall and J. Connell (2003) Genome-wide mapping of human loci for essential hypertension. *The Lancet* **361**:2118–2123.
- Clarke, R., J. F. Peden, J. C. Hopewell, T. Kyriakou, A. Goel, S. C. Heath, S. Parish, S. Barlera, M. G. Franzosi, S. Rust, D. Bennett, A. Silveira, A. Malarstig, F. R. Green, M. Lathrop, B. Gigante, K. Leander, U. de Faire, U. Seedorf, A. Hamsten, R. Collins, H. Watkins, M. Farrall and PROCARDIS Consortium (2009) Genetic variants associated with Lp(a) lipoprotein level and coronary disease. *N. Engl. J. Med.* **351**:2518–28.
- Cooper, J. A., G. J. Miller, K. A. Bauer, J. H. Morrissey, T. W. Meade, D. J. Howarth, S. Barzegar, J. P. Mitchell and R. D. Rosenberg (2000) Comparison of novel hemostatic factors and conventional risk factors for prediction of coronary heart disease. *Circulation* **102**:2816–2822.
- Dahlöf, B., P. S. Sever, N. R. Poulter, H. Wedel, G. Beevers, M. Caulfield, R. Collins, S. E. Kjeldsen, A. Kristinsson, G. T. McInnes, J. Mehlsen, M. Nieminen, E. O’Brien and J. Östergren for the ASCOT investigators (2005) Prevention of cardiovascular events with an antihypertensive regimen of amlodipine adding perindopril as required versus atenolol adding bendroflumethiazide as required, in the Anglo-Scandinavian Cardiac Outcomes Trial–Blood Pressure Lowering Arm (ASCOT-BPLA): A multicentre randomised controlled trial. *The Lancet* **366**:896–906. doi:10.1016/S0140-6736(05)67185-1.
- Euskirchen, G. M., J. S. Rozowsky, C.-L. Wei, W. H. Lee, Z. D. Zhang, S. Hartman, O. Emanuelsson, V. Stolc, S. Weissman, M. B. Gerstein, Y. Ruan and M. Snyder (2007) Mapping of transcription factor binding regions in mammalian cells by ChIP: Comparison of array- and sequencing-based technologies. *Genome Research* **17**:898–909. doi:10.1101/gr.5583007.
- Golara, M., C. Jones and M. R. A. H. Shennan (2002) Inflationary oscillometric blood pressure monitoring: Validation of the OMRON-MIT. *Blood Press. Monit.* **7**:325–328.
- Hansson, L., T. Hedner, P. Lund-Johansen, S. E. Kjeldsen, L. H. Lindholm, J. O. Syvertsen, J. Lanke, U. de Faire, B. Dahlöf and B. E. K. BE (2000) Randomised trial of effects of calcium antagonists compared with diuretics and beta-blockers on cardiovascular morbidity and mortality in hypertension: The Nordic Diltiazem (NORDIL) study. *Lancet* **356**:359–365.
- Hoggart, C. J., J. C. Whittaker, M. De Iorio and D. J. Balding (2008) Simultaneous analysis of all SNPs in genome-wide and re-sequencing association studies. *PLoS Genetics* **4**:e1000130. doi:10.1371/journal.pgen.1000130.
- Hong, K. W., J. E. Lim and B. Oh (2011) A regulatory SNP in *AKAP13* is associated with blood pressure in Koreans. *J. Hum. Genet.* **56**:205–210. doi:10.1038/jhg.2010.167.
- International HapMap Consortium (2007) A second generation human haplotype map of over 3.1 million SNPs. *Nature* **449**:851–862. doi:10.1038/nature06258.
- Ji, W., J. N. Foo, B. J. O’Roak, H. Zhao, M. G. Larson, D. B. Simon, C. Newton-Cheh, M. W. State, D. Levy and R. P. Lifton (2008) Rare independent mutations in renal salt handling genes contribute to blood pressure variation. *Nature Genetics* **40**:592–599. doi:10.1038/ng.118.

- Johnson, D. S., A. Mortazavi, R. M. Myers and B. Wold (2007) Genome-wide mapping of *in vivo* protein-DNA interactions. *Science* **316**:1497–1502.
- Kathiresan, S., O. Melander, D. Anevski, C. Guiducci, N. P. Burt, C. Roos, J. N. Hirschhorn, G. Berglund, B. Hedblad, L. Groop, D. M. Altshuler, C. Newton-Cheh and M. Orho-Melander (2008) Polymorphisms associated with cholesterol and risk of cardiovascular events. *N. Engl. J. Med.* **358**:1240–1249.
- Levy, D., G. B. Ehret, K. Rice, G. C. Verwoert, L. J. Launer, A. Dehghan, N. L. Glazer, A. C. Morrison, A. D. Johnson, T. Aspelund, Y. Aulchenko, T. Lumley, A. Kottgen, R. S. Vasani, F. Rivadeneira, G. Eiriksdottir, X. Guo, D. E. Arking, G. F. Mitchell, F. U. S. Mattace-Raso, A. V. Smith, K. Taylor, R. B. Scharpf, S.-J. Hwang, E. J. G. Sijbrands, J. Bis, T. B. Harris, S. K. Ganesh, C. J. O'Donnell, A. Hofman, J. I. Rotter, J. Coresh, E. J. Benjamin, A. G. Uitterlinden, G. Heiss, C. S. Fox, J. C. M. Witteman, E. Boerwinkle, T. J. Wang, V. Gudnason, M. G. Larson, A. Chakravarti, B. M. Psaty and C. M. van Duijn (2009) Genome-wide association study of blood pressure and hypertension. *Nature Genetics* **41**:677–687. doi:10.1038/ng.384.
- Li, J. and L. Ji (2005) Adjusting multiple testing in multilocus analyses using the Eigenvalues of a correlation matrix. *Heredity* **95**:221–227.
- Li, N., W. Luo, Z. Juhong, J. Yang, H. Wang, L. Zhou and J. Chang (2010) Associations between genetic variations in the *FURIN* gene and hypertension. *BMC Medical Genetics* **11**:124. doi:10.1186/1471-2350-11-124.
- Marchini, J., B. Howie, S. Myers, G. McVean and P. Donnelly (2007) A new multipoint method for genome-wide association studies by imputation of genotypes. *Nature Genetics* **39**:906–913. doi:10.1038/ng2088.
- Newhouse, S., M. Farrall, C. Wallace, M. Hoti, B. Burke, P. Howard, A. Onipinla, K. Lee, S. Shaw-Hawkins, R. Dobson, M. Brown, N. J. Samani, A. F. Dominiczak, J. M. Connell, G. M. Lathrop, J. Kooner, J. Chambers, P. Elliott, R. Clarke, R. Collins, M. Laan, E. Org, P. Juhanson, G. Veldre, M. Viigimaa, S. Eyheramendy, F. P. Cappuccio, C. Ji, R. Iacone, P. Strazzullo, M. Kumari, M. Marmot, E. Brunner, M. Caulfield and P. B. Munroe (2009) Polymorphisms in the *WNK1* gene are associated with blood pressure variation and urinary potassium excretion. *PLoS ONE* **4**:e5003. doi:10.1371/journal.pone.0005003.
- Newton-Cheh, C., T. Johnson, V. Gateva, M. D. Tobin, M. Bochud, L. Coin, S. S. Najjar, J. H. Zhao, S. C. Heath, S. Eyheramendy, K. Papadakis, B. F. Voight, L. J. Scott, F. Zhang, M. Farrall, T. Tanaka, C. Wallace, J. C. Chambers, K.-T. Khaw, P. Nilsson, P. van der Harst, S. Polidoro, D. E. Grobbee, N. C. Onland-Moret, M. L. Bots, L. V. Wain, K. S. Elliott, A. Teumer, J. Luan, G. Lucas, J. Kuusisto, P. R. Burton, D. Hadley, W. L. McArdle, M. Brown, A. Dominiczak, S. J. Newhouse, N. J. Samani, J. Webster, E. Zeggini, J. S. Beckmann, S. Bergmann, N. Lim, K. Song, P. Vollenweider, G. Waeber, D. M. Waterworth, X. Yuan, L. Groop, M. Orho-Melander, A. Allione, A. D. Gregorio, S. Guarrera, S. Panico, F. Ricceri, V. Romanuzzi, C. Sacerdote, P. Vineis, I. Barroso, M. S. Sandhu, R. N. Luben, G. J. Crawford, P. Jousilahti, M. Perola, M. Boehnke, L. L. Bonnycastle, F. S. Collins, A. U. Jackson, K. L. Mohlke, H. M. Stringham, T. T. Valle, C. J. Willer, R. N. Bergman, M. A. Morken, A. Doring, C. Gieger, T. Illig, T. Meitinger, E. Org, A. Pfeufer, H. E. Wichmann, S. Kathiresan, J. Marrugat, C. J. O'Donnell, S. M. Schwartz, D. S. Siscovick, I. Subirana, N. B. Freimer, A.-L. Hartikainen, M. I. McCarthy, P. F. O'Reilly, L. Peltonen, A. Pouta, P. E. de Jong, H. Snieder, W. H. van Gilst, R. Clarke, A. Goel, A. Hamsten, J. F. Peden, U. Sedorf, A.-C. Syvanen, G. Tognoni, E. G. Lakatta, S. Sanna, P. Scheet, D. Schlessinger, A. Scuteri, M. Dorr, F. Ernst, S. B. Felix, G. Homuth, R. Lorbeer, T. Reffelmann, R. Rettig, U. Volker, P. Galan, I. G. Gut, S. Herceberg, G. M. Lathrop, D. Zelenika, P. Deloukas, N. Soranzo, F. M. Williams, G. Zhai, V. Salomaa, M. Laakso, R. Elosua, N. G. Forouhi, H. Volzke, C. S. Uitterwaal, Y. T. van der Schouw, M. E. Numans, G. Matullo, G. Navis, G. Berglund, S. A. Bingham, J. S. Kooner, J. M. Connell, S. Bandinelli, L. Ferrucci, H. Watkins, T. D. Spector, J. Tuomilehto, D. Altshuler, D. P. Strachan, M. Laan, P. Meneton, N. J. Wareham, M. Uda, M.-R. Jarvelin, V. Mooser, O. Melander, R. J. Loos, P. Elliott, G. R. Abecasis, M. Caulfield and P. B. Munroe (2009) Genome-wide association study identifies eight loci associated with blood pressure. *Nature Genetics* **41**:666–676. doi:10.1038/ng.361.
- Nyholt, D. R. (2004) A simple correction for multiple testing for single-nucleotide polymorphisms in linkage disequilibrium with each other. *Am. J. Hum. Genet.* **74**:765–769.



- Org, E., S. Eyheramendy, P. Juhanson, C. Gieger, P. Lichtner, N. Klopp, G. Veldre, A. Döring, M. Viigimaa, S. Söber, K. Tomberg, G. Eckstein, KORA, P. Kelgo, T. Rebane, S. Shaw-Hawkins, P. Howard, A. Onipinla, R. J. Dobson, S. J. Newhouse, M. Brown, A. Dominiczak, J. Connell, N. Samani, M. Farrall, BRIGHT, M. J. Caulfield, P. B. Munroe, T. Illig, H.-E. Wichmann, T. Meitinger and M. Laan (2009) Genome-wide scan identifies *CDH13* as a novel susceptibility locus contributing to blood pressure determination in two European populations. *Human Molecular Genetics* **18**:2288–2296. doi:10.1093/hmg/ddp135.
- Price, A. L., N. J. Patterson, R. M. Plenge, M. E. Weinblatt, N. A. Shadick and D. Reich (2006) Principal components analysis corrects for stratification in genome-wide association studies. *Nature Genetics* **38**:904–909. doi:10.1038/ng1847.
- Purcell, S., B. Neale, K. Todd-Brown, L. Thomas, M. A. R. Ferreira, D. Bender, J. Maller, P. Sklar, P. I. W. de Bakker, M. J. Daly and P. C. Sham (2007) PLINK: A tool set for whole-genome association and population-based linkage analyses. *Am. J. Hum. Genet.* **81**:559–575. doi:10.1086/519795.
- R Development Core Team (2004) *R: A Language and Environment for Statistical Computing*. R Foundation for Statistical Computing, Vienna, Austria. 3-900051-07-0.
- Ramensky, V., P. Bork and S. Sunyaev (2002) Human non-synonymous SNPs: Server and survey. *Nucleic Acids Res.* **30**:3894–3900.
- Raney, B. J., M. S. Cline, K. R. Rosenbloom, T. R. Dreszer, K. Learned, G. P. Barber, L. R. Meyer, C. A. Sloan, V. S. Malladi, K. M. Roskin, B. B. Suh, A. S. Hinrichs, H. Clawson, A. S. Zweig, V. Kirkup, P. A. Fujita, B. Rhead, K. E. Smith, A. Pohl, R. M. Kuhn, D. Karolchik, D. Haussler and W. J. Kent (2010) ENCODE whole-genome data in the UCSC genome browser (2011 update). *Nucleic Acids Research* p. on line ahead of print. doi:10.1093/nar/gkq1017.
- Rozowsky, J., G. Euskirchen, R. K. Auerbach, Z. D. Zhang, T. Gibson, R. Bjornson, N. Carriero, M. Snyder and M. B. Gerstein (2009) PeakSeq enables systematic scoring of ChIP-seq experiments relative to controls. *Nature Biotechnology* **27**:66–75.
- Sever, P. S., B. Dahlöf, N. R. Poulter, H. Wedel, G. Beevers, M. Caulfield, R. Collins, S. E. Kjeldsen, A. Kristinsson, G. T. McInnes, J. Mehlsen, M. Nieminen, E. O'Brien and J. Östergren for the ASCOT investigators (2003) Prevention of coronary and stroke events with atorvastatin in hypertensive patients who have average or lower-than-average cholesterol concentrations, in the Anglo-Scandinavian Cardiac Outcomes Trial–Lipid Lowering Arm (ASCOT-LLA): A multicentre randomised controlled trial. *The Lancet* **361**:1149–1158.
- Sever, P. S., B. Dahlöf, N. R. Poulter, H. Wedel, G. Beevers, M. Caulfield, R. Collins, S. E. Kjeldsen, G. T. McInnes, J. Mehlsen, M. Nieminen, E. O'Brien and J. Östergren (2001) Rationale, design, methods and baseline demography of participants of the anglo-scandinavian cardiac outcomes trial. *J. Hypertension* **19**:1139–1147.
- Stephens, M. and D. J. Balding (2009) Bayesian statistical methods for genetic association studies. *Nature Reviews Genetics* **10**:681–690.
- Strandhagen, E., C. Berg, L. Lissner, L. Nunez, A. Rosengren, K. Torén and D. S. Thelle (2010) Selection bias in a population survey with registry linkage: Potential effect on socioeconomic gradient in cardiovascular risk. *Eur. J. Epidemiol.* **25**:163–72.
- Teo, Y. Y., M. Inouye, K. S. Small, R. Gwilliam, P. Deloukas, D. P. Kwiatkowski and T. G. Clark (2007) A genotype calling algorithm for the Illumina BeadArray platform. *Bioinformatics* **23**:2741–2746. doi:10.1093/bioinformatics/btm443.
- The ENCODE Project Consortium (2007) Identification and analysis of functional elements in 1% of the human genome by the ENCODE pilot project. *Nature* **447**:799–816. doi:10.1038/nature05874.
- Tobin, M. D., M. Tomaszewski, P. S. Braund, C. Hajat, S. M. Raleigh, T. M. Palmer, M. Caulfield, P. R. Burton and N. J. Samani (2008) Common variants in genes underlying monogenic hypertension and hypotension and blood pressure in the general population. *Hypertension* **51**:1658–1664. doi:10.1161/HYPERTENSIONAHA.108.11266.

- Tusher, V. G., R. Tibshirani and G. Chu (2001) Significance analysis of microarrays applied to the ionizing radiation response. *Proc. Natl. Acad. Sci. USA* **98**:5116–5121.
- Valouev, A., D. S. Johnson, A. Sundquist, C. Medina, E. Anton, S. Batzoglou, R. M. Myers and A. Sidow (2008) Genome-wide analysis of transcription factor binding sites based on ChIP-Seq data. *Nature Methods* **5**:829–834.
- Voight, B. F., L. J. Scott, V. Steinthorsdottir, A. P. Morris, C. Dina, R. P. Welch, E. Zeggini, C. Huth, Y. S. Aulchenko, G. Thorleifsson, L. J. McCulloch, T. Ferreira, H. Grallert, N. Amin, G. Wu, C. J. Willer, S. Raychaudhuri, S. A. McCarroll, C. Langenberg, O. M. Hofmann, J. Dupuis, L. Qi, A. V. Segre, M. van Hoek, P. Navarro, K. Ardlie, B. Balkau, R. Benediktsson, A. J. Bennett, R. Blagieva, E. Boerwinkle, L. L. Bonnycastle, K. B. Bostrom, B. Bravenboer, S. Bumpstead, N. P. Burt, G. Charpentier, P. S. Chines, M. Cornelis, D. J. Couper, G. Crawford, A. S. F. Doney, K. S. Elliott, A. L. Elliott, M. R. Erdos, C. S. Fox, C. S. Franklin, M. Ganser, C. Gieger, N. Grarup, T. Green, S. Griffin, C. J. Groves, C. Guiducci, S. Hadjadj, N. Hassanali, C. Herder, B. Isomaa, A. U. Jackson, P. R. V. Johnson, T. Jorgensen, W. H. L. Kao, N. Klopp, A. Kong, P. Kraft, J. Kuusisto, T. Lauritzen, M. Li, A. Lieveise, C. M. Lindgren, V. Lyssenko, M. Marre, T. Meitinger, K. Midtthjell, M. A. Morken, N. Narisu, P. Nilsson, K. R. Owen, F. Payne, J. R. B. Perry, A.-K. Petersen, C. Platou, C. Proenca, I. Prokopenko, W. Rathmann, N. W. Rayner, N. R. Robertson, G. Rocheleau, M. Roden, M. J. Sampson, R. Saxena, B. M. Shields, P. Shrader, G. Sigurdsson, T. Sparso, K. Strassburger, H. M. Stringham, Q. Sun, A. J. Swift, B. Thorand, J. Tichet, T. Tuomi, R. M. van Dam, T. W. van Haeften, T. van Herpt, J. V. van Vliet-Ostaptchouk, G. B. Walters, M. N. Weedon, C. Wijmenga, J. Witteman, R. N. Bergman, S. Cauchi, F. S. Collins, A. L. Gloyn, U. Gyllenstein, T. Hansen, W. A. Hide, G. A. Hitman, A. Hofman, D. J. Hunter, K. Hveem, M. Laakso, K. L. Mohlke, A. D. Morris, C. N. A. Palmer, P. P. Pramstaller, I. Rudan, E. Sijbrands, L. D. Stein, J. Tuomilehto, A. Uitterlinden, M. Walker, N. J. Wareham, R. M. Watanabe, G. R. Abecasis, B. O. Boehm, H. Campbell, M. J. Daly, A. T. Hattersley, F. B. Hu, J. B. Meigs, J. S. Pankow, O. Pedersen, H.-E. Wichmann, I. Barroso, J. C. Florez, T. M. Frayling, L. Groop, R. Sladek, U. Thorsteinsdottir, J. F. Wilson, T. Illig, P. Froguel, C. M. van Duijn, K. Stefansson, D. Altshuler, M. Boehnke and M. I. McCarthy (2010) Twelve type 2 diabetes susceptibility loci identified through large-scale association analysis. *Nature Genetics* **42**:579–589. doi:10.1038/ng.609.
- Wadsworth, M., D. Kuh, M. Richards and R. Hardy (2006) Cohort profile: The 1946 national birth cohort (MRC national survey of health and development). *Int. J. Epidemiol.* **35**:49–54. doi:10.1093/ije/dyi201.
- Wakefield, J. (2009) Bayes factors for genome-wide association studies: Comparison with p-values. *Genetic Epidemiology* **33**:79–86.
- Wang, Y., J. R. O'Connell, P. F. McArdle, J. B. Wade, S. E. Dorff, S. J. Shah, X. Shi, L. Pan, E. Rampsaud, H. Shen, J. D. Kim, A. R. Subramanya, N. I. Steinle, A. Parsa, C. C. Ober, P. A. Welling, A. Chakravarti, A. B. Weder, R. S. Cooper, B. D. Mitchell, A. R. Shuldiner and Y.-P. C. Chang (2008) Whole-genome association study identifies *STK39* as a hypertension susceptibility gene. *Proc. Natl. Acad. Sci. USA* **106**:226–231. doi:10.1073/pnas.0808358106.
- Wellcome Trust Case Control Consortium (2007) Genome-wide association study of 14,000 cases of seven common diseases and 3,000 shared controls. *Nature* **447**:661–678. doi:10.1038/nature05911.
- Zhang, Y., T. Liu, C. A. Meyer, J. Eeckhoute, D. S. Johnson, B. E. Bernstein, C. Nusbaum, R. M. Myers, M. Brown, W. Li and X. S. Liu (2008) Model-based analysis of ChIP-Seq (MACS). *Genome Biology* **9**:R137. doi:10.1186/gb-2008-9-9-r137.
- Zhu, X., J. H. Young, E. Fox, B. J. Keating, N. Franceschini, S. Kang, B. Tayo, A. Adeyemo, Y. V. Sun, Y. Li, A. Morrison, C. Newton-Cheh, K. Liu, S. K. Ganesh, A. Kutlar, R. S. Vasani, A. Dreisbach, S. Wyatt, J. Polak, W. Palmas, S. Musani, H. Taylor, R. Fabsitz, R. R. Townsend, D. Dries, J. Glessner, C. W. Chiang, T. Mosley, S. Kardina, D. Curb, J. N. Hirschhorn, C. Rotimi, A. Reiner, C. Eaton, J. I. Rotter, R. S. Cooper, S. Redline, A. Chakravarti and D. L. D (2011) Combined admixture mapping and association analysis identifies a novel blood pressure genetic locus on 5p13: Contributions from the CARE consortium. *Hum. Mol. Genet.* **20**:2285–2295. doi:10.1093/hmg/ddr113.
